# Supplementary material for: Is teenage pregnancy an obstetric risk in a welfare society? A population-based study in Finland, from 2006 to 2011
Source: PubMed Central journal article supplement — BMJ Open. 2013 Aug 17;3(8):e003225. doi: 10.1136/bmjopen-2013-003225 (PMC3753503; doi:10.1136/bmjopen-2013-003225), 2013-08-17
Supplement: bmjopen-2013-003225.draft_revisions.pdf [file bmjopen-2013-003225.draft_revisions.pdf]

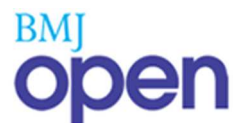

**Is teenage pregnancy an obstetric risk in a welfare society?  
A population-based study in Finland, from 2006 to 2011.**

|                                    |                                                                                                                                                                                                                                                                        |
|------------------------------------|------------------------------------------------------------------------------------------------------------------------------------------------------------------------------------------------------------------------------------------------------------------------|
| Journal:                           | <i>BMJ Open</i>                                                                                                                                                                                                                                                        |
| Manuscript ID:                     | bmjopen-2013-003225                                                                                                                                                                                                                                                    |
| Article Type:                      | Research                                                                                                                                                                                                                                                               |
| Date Submitted by the Author:      | 14-May-2013                                                                                                                                                                                                                                                            |
| Complete List of Authors:          | Leppälahti, Suvi; Kätilöopisto Hospital, Ob&Gyn<br>Gissler, M; THL National Institute for Health and Welfare, Information<br>Mentula, Maarit; Kätilöopisto Hospital, Ob&Gyn<br>Heikinheimo, Oskari; Helsinki University Central Hospital, Obstetrics and<br>gynecology |
| <b>Primary Subject<br>Heading</b>: | Obstetrics and gynaecology                                                                                                                                                                                                                                             |
| Secondary Subject Heading:         | Epidemiology, Reproductive medicine, Sexual health                                                                                                                                                                                                                     |
| Keywords:                          | Maternal medicine < OBSTETRICS, PERINATOLOGY, PUBLIC HEALTH,<br>Adolescent                                                                                                                                                                                             |
|                                    |                                                                                                                                                                                                                                                                        |

SCHOLARONE™  
Manuscripts

1  
2  
3  
4  
5  
6  
7 **TITLE PAGE**  
8  
9

10  
11  
12 **Is teenage pregnancy an obstetric risk in a welfare society? A population-based study**  
13  
14 **in Finland, from 2006 to 2011.**  
15  
16

17  
18  
19  
20  
21 Suvi Leppälahti, Mika Gissler, Maarit Mentula, Oskari Heikinheimo  
22

23  
24  
25  
26  
27  
28 Department of Obstetrics and Gynecology/Kätilöopisto Hospital, *University of Helsinki and Helsinki*  
29  
30 *University Central Hospital*, P.O. Box 610, 00029-HUS, Helsinki, Finland. Suvi Leppälahti, specialising  
31  
32 physician, Maarit Mentula, consultant gynaecologist, Oskari Heikinheimo, chief physician  
33  
34

35  
36 Mika Gissler, THL National Institute for Health and Welfare, P.O. BOX 30, 00271 Helsinki, Finland.  
37

38  
39 Mika Gissler, research professor  
40

41  
42 Correspondence to: Oskari Heikinheimo: [oskari.heikinheimo@helsinki.fi](mailto:oskari.heikinheimo@helsinki.fi)  
43  
44

45  
46 Keywords: Pregnancy, adolescence, complications, prenatal care  
47

48  
49 Word count: 4335  
50

51  
52 Number of tables: 5  
53  
54

55  
56 Number of figures: 1  
57  
58  
59  
60

## ABSTRACT

**Objective:** To assess obstetric outcomes in teenage pregnancies in a country with a low teenage delivery rate and comprehensive high-quality prenatal care.

**Design:** Retrospective population-based register study.

**Setting:** Finland.

**Participants:** All nulliparous teenagers (13–15 years [n=84], 16–17 years [n=1234], 18–19 years [n=5987]) and controls (25–29-year-old women [n=51 142]) with singleton deliveries in 2006–2011.

**Main outcome measures:** Risk of adverse obstetric outcomes adjusted for demographic factors and clinically relevant pregnancy complications.

**Results:** Teenage mothers were more likely than controls to live in rural areas (16.0% [n=1168] vs. 11.8% [n=6035]), smoke (36.4% [n=2661] vs. 7.0% [n=3580]) and misuse alcohol or drugs (1.1% [n=82] vs. 0.2% [n=96]) ( $p<0.001$  for all). Teenagers made a good mean number of antenatal clinic visits (16.4 vs. 16.5), but were more likely to have attended fewer than half of the recommended visits (2.9% [n=155] vs. 1.4% [n=716]).

Teenagers faced increased risks of several obstetric complications, e.g. anaemia (adjusted odds ratio 1.8, 95% confidence interval 1.6 to 2.1), proteinuria (1.8, 1.2 to 2.6) urinary tract infection (UTI) (2.9, 1.8 to 4.8) pyelonephritis (6.3, 3.8 to 10.4) and eclampsia (3.2, 1.4 to 7.3), the risks increasing with descending age for most outcomes. Elevated risks of pre-eclampsia (3.7, 1.5 to 9.0) and preterm delivery (2.5, 1.2 to 5.3) were also found among 13–15-year-olds. However, teenage mothers were

1  
2  
3 more likely to have vaginal delivery (1.9, 1.7 to 2.0) without complications. Inadequate prenatal care  
4  
5 among teenagers was a risk factor of eclampsia (12.6, 2.6 to 62.6), UTI (5.8, 1.7 to 19.7) and adverse  
6  
7 neonatal outcomes.  
8  
9

10  
11 **Conclusions:** Pregnant teenagers tended to be socioeconomically disadvantaged vs. controls and  
12  
13 faced higher risks of various pregnancy complications. Special attention should be paid to enrolling  
14  
15 teenagers into adequate prenatal care in early pregnancy.  
16  
17

18  
19  
20 Word count: 292  
21  
22  
23  
24  
25  
26  
27  
28  
29  
30  
31  
32  
33  
34  
35  
36  
37  
38  
39  
40  
41  
42  
43  
44  
45  
46  
47  
48  
49  
50  
51  
52  
53  
54  
55  
56  
57  
58  
59  
60

## ARTICLE SUMMARY

### Article focus

- Teenage pregnancy is associated with maternal anaemia and preterm birth. Association with other adverse obstetric outcomes, especially maternal complications, is less clear.
- Adequate antenatal care among teenagers has been shown to decrease adverse neonatal outcomes, but comprehensive care to all women was not offered in the previous study settings.
- We examined age-specific risks of adverse obstetric outcomes among teenagers, focusing on maternal pregnancy complications and the role of inadequate antenatal care.

### Key messages

- In addition to a higher risk of anaemia, elevated risks of urinary tract infection, pyelonephritis, proteinuria and eclampsia were found among teenagers as well as pre-eclampsia and preterm delivery among the youngest girls.
- Inadequate antenatal care may place teenagers at markedly elevated risks of urinary tract infection, eclampsia and adverse neonatal outcomes even in a welfare society offering high-quality care to all pregnant women.

### Strengths and limitations of this study

- The present study was nationwide, giving a realistic reflection of the situation regarding obstetric challenges among all teenage pregnancies during the study period.
- We were able to investigate a number of factors that have been sparsely reported in connection with teenage pregnancies, including proteinuria, cystitis and pyelonephritis during pregnancy, fear of childbirth and pain relief during delivery.
- Our study was retrospective and we could not look at the socioeconomic or educational status of women.

## INTRODUCTION

Pregnancy during teenage years is associated with socioeconomic and health inequalities as regards both mother and child,<sup>1-5</sup> including higher risks of deprivation,<sup>2</sup> behavioural and emotional difficulties,<sup>2</sup> maltreatment,<sup>1</sup> morbidity<sup>1</sup> and premature mortality.<sup>1 4</sup> Therefore, it is a global concern. Although most pronounced in developing countries, teenage pregnancy also remains a significant problem in the developed world. The incidence of teenage pregnancy ending in delivery varies widely, with Nordic countries having comparatively low rates: 6/1000 in Sweden<sup>6</sup> and 9/1000 in Finland,<sup>6</sup> compared with 24/1000 in England and Wales<sup>7</sup> and 34/1000 in the USA in 2010.<sup>8</sup>

Obstetric risks are often divided into categories of maternal complications, mode of delivery and its complications, and neonatal outcome. Teenage pregnancies are associated with maternal anaemia,<sup>9-12</sup> hypertensive problems<sup>13 14</sup> and premature birth,<sup>15-17</sup> while low risks as regards delivery complications have been reported in studies carried out in industrialised countries.<sup>9-12 17</sup> However, results concerning several adverse outcomes vary largely, possibly as a result of the great number of confounding factors. Poor socioeconomic conditions,<sup>1 9 10</sup> risky health behaviour,<sup>9 12</sup> inadequate prenatal care<sup>17-19</sup> and biological immaturity<sup>15-17</sup> have been suggested as possible explanations for adverse obstetric outcomes.

Although the issue of teenage pregnancy has been widely studied, a consensus of opinion on obstetric risks is lacking. Comprehensive, age-specific studies concerning maternal complications remain sparse.<sup>9 16</sup> In addition, the role of prenatal care<sup>9</sup> in regard to these problems is not well established.

The objective of the present study was to investigate the risks of adverse obstetric outcomes in teenagers in a country with a low rate of adolescent births and comprehensive high-quality prenatal

1  
2  
3 care, with special focus on maternal complications during pregnancy. Secondly, we aimed to focus on  
4  
5  
6 the effect on these outcomes of a low number of visits to antenatal clinics.  
7  
8

## 9 **MATERIAL AND METHODS**

### 10 **Study population**

11  
12  
13  
14  
15  
16  
17 We identified all childbirths (n=354 833, of which 349 531 were singleton births) between 1 January  
18  
19 2006 and 31 December 2011 in Finland using the national Medical Birth Register (MBR). Only  
20  
21  
22 singleton pregnancies of nulliparous women (n=97 838) were included. Cases of major congenital  
23  
24 anomaly were excluded (n=4149). After exclusion, there was a total of 7305 singleton childbirths  
25  
26 among 13—19-year-old nulliparous girls and women, further divided into three groups: 13—15-year-  
27  
28 olds (n=84), 16—17-year-olds (n=1234), and 18—19-year-olds (n=5987). Singleton deliveries (n=51  
29  
30 142) among women aged 25—29 years served as reference material. Women with histories of  
31  
32 abortion and miscarriage (n=11 703, 20.1%) were included.  
33  
34  
35  
36  
37

### 38 **Data collection**

39  
40  
41  
42 The study data were obtained from the MBR and the Hospital Discharge Register (HDR), maintained  
43  
44 by the National Institute for Health and Welfare. Reporting to these national registers is obligatory  
45  
46 and the data has been shown to be valid and to reflect good coverage.<sup>20</sup>  
47  
48

49  
50 Data for the MBR is collected at all maternity hospitals in Finland.<sup>21</sup> It covers all live births and  
51  
52 stillbirths with a birth weight of 500 grams or more or with a gestational age of 22 weeks or more. The  
53  
54  
55  
56  
57  
58  
59  
60

1  
2  
3 register includes information on maternal demographic factors, prenatal care, interventions and  
4  
5 common diagnoses during pregnancy and delivery and neonatal outcomes until the age of seven days.  
6  
7

8  
9 The HDR contains information on all in-patient periods in public and private hospitals and out-patient  
10  
11 visits in the public sector. The information includes diagnosis (ICD-10 codes), dates of admission and  
12  
13 discharge and the code of the hospital or other institution. We collected the data separately for  
14  
15 pregnancy and delivery (delivery complications include diagnoses reported from the start of delivery  
16  
17 until 42 days postpartum). Each complication was noted once per woman.  
18  
19  
20

## 21 22 **Study variables**

23  
24  
25  
26 The choice of study variables was based on previous literature and clinical relevance. All study  
27  
28 variables are listed with ICD-10 codes, unless derived from the MBR in a separate check-box.  
29

30  
31 **Maternal outcomes** of interest were anaemia (haemoglobin below 100 g/l), pregnancy-induced  
32  
33 hypertension (PIH) (O13, O16), pre-eclampsia (O14), eclampsia, gestational diabetes, intrahepatic  
34  
35 cholestasis of pregnancy (O26.6), *placenta praevia*, sexually transmitted infections (*Chlamydia*  
36  
37 *trachomatis* [A56], *Neisseria gonorrhoeae* and syphilis [A51-A54]), urinary tract infection (UTI) (N30,  
38  
39 N34, N39.0, O23.1–O23.4, O23.9), pyelonephritis (N10, N12, O23.0), chorioamnionitis (O41.1),  
40  
41 proteinuria (O12 excluding O12.0), preterm contractions (before 37 weeks of gestation; O47.0),  
42  
43 bleeding in early pregnancy (O20) and fear of childbirth (O99.80).  
44  
45  
46  
47  
48

49  
50 **Delivery outcomes** of interest were mode of delivery (vaginal delivery, vaginal breech delivery,  
51  
52 assisted vaginal delivery [vacuum extraction or forceps] and Caesarean section [elective, urgent and  
53  
54 emergency]), induction of labour, use of oxytocin, episiotomy, pain relief during delivery (regional  
55  
56 anaesthesia, other medication and non-medical pain relief), anal sphincter rupture, shoulder dystocia,  
57  
58  
59  
60



1  
2  
3 placental abruption, uterine curettage, abnormal bleeding during (O67) and after delivery (O72),  
4  
5  
6 uterine rupture (O71.0–O71.1) and postpartum infection (O85, O86, N71, N72).  
7  
8

9 **Neonatal outcomes** selected for analysis were premature birth (extremely premature [<28 weeks]  
10  
11 and premature [<37 weeks of gestation]), birth weight adjusted for gestational age<sup>22</sup> (divided into  
12  
13 small-for-gestational-age [SGA], average-for-gestational-age [AGA] and large-for-gestational age  
14  
15 [LGA]), 5-min Apgar score below 7, cord blood pH below 7.05 at birth, resuscitation of the newborn,  
16  
17 use of a respirator, use of antibiotics, phototherapy, admission to a neonatal intensive care unit,  
18  
19 intrauterine fetal death (delivery of a stillborn at 22 weeks of gestation or later) and neonatal death  
20  
21 (death of a live-born at 0–6 days of age).  
22  
23  
24  
25  
26

27 **Demographic factors** are presented in Table 1. Of these, alcohol or drug misuse during pregnancy  
28  
29 (Z72.1–Z72.2), pre-existing diabetes (E10–E12, O24.0–O24.3) and pre-existing hypertension (I10,  
30  
31 O10–O11) were derived from the HDR and other variables from the MBR.  
32  
33  
34  
35  
36  
37  
38  
39  
40  
41  
42  
43  
44  
45  
46  
47  
48  
49  
50  
51  
52  
53  
54  
55  
56  
57  
58  
59  
60

Table 1. Demographic characteristics according to age group (years)

|                                                | 13–15     | 16–17      | 18–19       | All teenagers | 25–29         | P for difference |
|------------------------------------------------|-----------|------------|-------------|---------------|---------------|------------------|
| <b>n</b>                                       | 84        | 1234       | 5987        | 7305          | 51 142        |                  |
| <b>Cohabitation status</b>                     |           |            |             |               |               |                  |
| Married/cohabiting                             | 13 (15.5) | 598 (48.5) | 4248 (71.0) | 4859 (66.5)   | 45 262 (88.5) | <0.001           |
| Single                                         | 45 (53.6) | 471 (38.2) | 1132 (18.9) | 1644 (22.5)   | 2608 (5.1)    |                  |
| Missing data                                   | 26 (30.9) | 165 (13.3) | 607 (10.1)  | 802 (11.0)    | 3272 (6.4)    |                  |
| <b>Type of residence</b>                       |           |            |             |               |               |                  |
| Urban                                          | 52 (61.9) | 820 (66.5) | 3980 (66.5) | 4852 (66.4)   | 37589 (73.5)  | <0.001           |
| Densely populated                              | 14 (16.7) | 185 (15.0) | 1050 (17.5) | 1249 (17.1)   | 7313 (14.3)   |                  |
| Rural                                          | 16 (19.0) | 222(18.0)  | 930 (15.5)  | 1168 (16.0)   | 6035 (11.8)   |                  |
| Missing data                                   | 2 (2.4)   | 7 (0.5)    | 27 (0.5)    | 36 (0.5)      | 205 (0.4)     |                  |
| <b>Smoking during pregnancy</b>                |           |            |             |               |               |                  |
| Yes                                            | 28 (33.3) | 506 (41.3) | 2127 (35.5) | 2661 (36.4)   | 3580 (7.0)    | <0.001           |
| Quit during 1st trimester                      | 11(13.1)  | 157 (12.7) | 725 (12.1)  | 893 (12.2)    | 3324 (6.5)    |                  |
| Missing data                                   | 6 (7.1)   | 37 (3.0)   | 171 (2.9)   | 214 (2.9)     | 921 (1.8)     |                  |
| <b>Alcohol or drug misuse during pregnancy</b> | 3 (3.6)   | 14 (1.1)   | 65 (1.1)    | 82 (1.1)      | 96 (0.2)      | <0.001           |
| <b>BMI before pregnancy</b>                    |           |            |             |               |               |                  |
| Underweight*                                   | 16 (19.0) | 155 (12.6) | 57 (9.6)    | 228 (10.3)    | 1841 (3.6)    | <0.001           |
| Obese**                                        | 109 (1.3) | 63 (5.1)   | 395 (6.6)   | 567 (6.3)     | 4347 (8.5)    |                  |
| Missing data                                   | 6 (7.1)   | 57 (4.6)   | 174 (2.9)   | 237 (3.2)     | 1074 (2.1)    |                  |
| <b>History of spontaneous abortion(s)</b>      | 2 (2.4)   | 51 (4.1)   | 479 (8.0)   | 532 (7.3)     | 5984 (11.7)   | <0.001           |
| <b>Pre-existing hypertension</b>               | 0 (0)     | 1 (0.1)    | 6 (0.1)     | 7 (0.1)       | 102 (0.2)     | 0.026            |
| <b>Pre-existing diabetes</b>                   | 0 (0)     | 7 (0.6)    | 42 (0.7)    | 49 (0.7)      | 358 (0.7)     | 0.834            |

Data expressed as n (%).

\*BMI <18.5 kg/m<sup>2</sup>\*\*BMI ≥ 30.0 kg/m<sup>2</sup>

1  
2  
3  
4  
5  
6  
7 The area of residence at the time of delivery was divided into urban, densely populated or rural  
8  
9 according to national classification by Statistics Finland.<sup>23</sup> Pre-pregnancy BMI was calculated on the  
10  
11 basis of height and weight measures reported by the pregnant women. As the “adult” BMI curve  
12  
13 plateau is seen at 15–16 years of age, and the total number of teenagers below this age was small in  
14  
15 our study, we used the same BMI for adolescents and adults instead of using the ISO-BMI for  
16  
17 adolescents.  
18  
19

20  
21  
22 Adequacy of prenatal care was calculated on the basis of the expected number of antenatal clinic  
23  
24 visits<sup>24</sup> adjusted for gestational age at birth. Inadequate prenatal care was defined as attendance at  
25  
26 fewer than half of the recommended number of visits.  
27  
28  
29

### 30 31 **Statistical analysis** 32

33  
34  
35 To assess differences between age groups, the  $\chi^2$  test and Fisher’s exact test were used as  
36  
37 appropriate. A P-value <0.05 was defined as statistically significant. To determine the estimated risks  
38  
39 of adverse outcomes we calculated unadjusted and adjusted odds ratios (ORs) with their 95%  
40  
41 confidence intervals (CIs), using binary logistic regression. To minimise confounding effects, we used  
42  
43 several multivariate models depending on the outcome variable analysed. Our basic multivariate  
44  
45 model included all demographic factors presented in Table 1 (except for history of spontaneous  
46  
47 abortions, which was used for preterm birth only) and adequacy of prenatal care. Pregnancy  
48  
49 complications were added to the model when found to be clinically relevant. Variables were removed  
50  
51 from the model when necessary as a result of small numbers of cases regarding rare adverse  
52  
53 outcomes.  
54  
55  
56  
57  
58  
59  
60

1  
2  
3 A subgroup analysis was carried out including only teenagers, dividing the group into those with  
4  
5 inadequate and adequate prenatal care. We analysed unadjusted and adjusted estimates of risk (ORs)  
6  
7 with their 95% CIs using the group with adequate care as the control group. For the multivariate  
8  
9 model, we used the basic multivariate model (see above), excluding pre-existing hypertension and  
10  
11 diabetes as a result of small numbers of cases. We also used preterm birth as a confounding factor  
12  
13 when analysing the estimated risks of a low Apgar score, need of intensive care, and death. We did  
14  
15 not use other confounding factors in the subgroup analysis because teenagers with inadequate  
16  
17 prenatal care might have been diagnosed with pregnancy complications less often as a result of a low  
18  
19 number of visits, thus causing possible bias.  
20  
21  
22  
23  
24

25  
26 To further minimise bias, we used list-wise deletion in logistic regression analysis when data was  
27  
28 missing. The percentages of missing cases as regards demographic factors are shown in Table 1.  
29  
30  
31

32 IBM SPSS statistics 19.0 and 20.0 for Windows were used for the statistical analyses.  
33  
34  
35

## 36 RESULTS

### 37 Demographics

38  
39  
40 All the demographic characteristics of the teen agers vs. the reference women differed significantly,  
41  
42 except for pre-existing diabetes (Table 1). Pregnant teenagers were more likely to be single, live in a  
43  
44 rural area, smoke and be diagnosed with misuse of alcohol or drugs during pregnancy. Pre-existing  
45  
46 hypertension was more common in the reference group.  
47  
48  
49  
50  
51  
52  
53  
54  
55  
56  
57  
58  
59  
60

All groups showed a good mean number of visits to an antenatal clinic (Table 2). However, teenagers started their prenatal care significantly later in pregnancy. All teenage groups were also more likely to show a significantly lower attendance rate.

**Table 2: Prenatal care according to age group (years)**

|                                                | 13–15      | 16–17      | 18–19      | All teenagers | 25–29      | P for difference |
|------------------------------------------------|------------|------------|------------|---------------|------------|------------------|
| <b>n</b>                                       | 84         | 1234       | 5987       | 7305          | 51 142     |                  |
| <b>All prenatal visits (Mean ± SD)</b>         | 14.6 ± 6.0 | 16.1 ± 5.8 | 16.5 ± 5.3 | 16.4 ± 5.4    | 16.5 ± 4.7 | <0.001           |
| <b>Hospital polyclinic visits (Mean ± SD)</b>  | 4.3 ± 2.3  | 3.7 ± 2.9  | 3.1 ± 2.7  | 3.2 ± 2.8     | 2.7 ± 2.5  | <0.001           |
| <b>First prenatal visit, gestational weeks</b> | 18.8 ± 9.0 | 12.6 ± 7.2 | 10.2 ± 5.0 | 10.7 ± 5.6    | 9.0 ± 3.1  | <0.001           |
| <b>Low attendance (%)</b>                      |            |            |            |               |            |                  |
| <50% of expected visits                        | 4 (4.9)    | 7 (5.4)    | 144 (2.4)  | 155 (2.9)     | 716 (1.4)  | <0.001           |

## Pregnancy complications

Significantly increased risks of anaemia, eclampsia, proteinuria, UTIs and pyelonephritis were noted among the teenagers. The youngest group of teenagers (13–15-year-olds) had an elevated risk of pre-eclampsia and a small excess risk was also noted among 18–19-year-olds after controlling for confounding factors (Table 3). The frequency of gestational diabetes (5.3% [n=385] vs. 8.2% [n=4173], adjusted odds ratio [adj. OR] 0.7, 95% CI 0.6 to 0.7) and *placenta praevia* (0.04% [n=3] vs. 0.3% [n=161], adj. OR 0.1, 0.01 to 0.8) was lower among 13–19-year-olds, whereas teenagers were more often diagnosed with preterm contractions (4.0% [n=289] vs. 2.6% [n=1333], adj. OR 1.5, 1.3 to 1.7) compared with reference women. The differences between 13–15-year-olds and the reference group were non-significant as regards gestational diabetes, *placenta praevia* and preterm contractions, as was the case between 16–17-year-olds and the reference group as regards *placenta praevia*.

Table 3: Maternal complications during pregnancy according to age group

|                                    | n                | Maternal age in years |                   |                   |                   |            |
|------------------------------------|------------------|-----------------------|-------------------|-------------------|-------------------|------------|
|                                    |                  | 13–15                 | 16–17             | 18–19             | All teenagers     | 25–29      |
| <b>Anaemia<sup>*M1</sup></b>       | n (%)            | 6 (7.1)               | 64 (5.2)          | 245 (4.1)         | 315 (4.3)         | 1227 (2.4) |
|                                    | OR (95% CI)      | 3.2 (1.4 to 7.3)      | 2.3 (1.7 to 2.9)  | 1.8 (1.5 to 2.0)  | 1.9 (1.7 to 2.1)  |            |
|                                    | Adj. OR (95% CI) | 3.1 (1.3 to 7.3)      | 2.2 (1.7 to 2.9)  | 1.8 (1.2 to 2.1)  | 1.8 (1.6 to 2.1)  | 1 (Ref.)   |
| <b>Pre-eclampsia<sup>M2</sup></b>  | n (%)            | 6 (7.1)               | 26 (2.1)          | 182 (3.0)         | 214 (2.9)         | 1522 (3.0) |
|                                    | OR (95% CI)      | 2.5 (1.1 to 5.8)      | 0.7 (0.5 to 1.0)  | 1.0 (0.9 to 1.2)  | 1.0 (0.9 to 1.1)  |            |
|                                    | Adj. OR (95% CI) | 3.7 (1.5 to 9.0)      | 0.9 (0.6 to 1.4)  | 1.2 (1.0 to 1.5)  | 1.2 (1.0 to 1.4)  | 1 (Ref.)   |
| <b>Eclampsia<sup>M4</sup></b>      | n (%)            | 0 (0.0)               | 2 (0.2)           | 9 (0.2)           | 11 (0.2)          | 26 (0.1)   |
|                                    | OR (95% CI)      | -                     | 3.2 (0.8 to 13.5) | 3.9 (1.4 to 6.3)  | 3.0 (1.4 to 6.0)  |            |
|                                    | Adj. OR (95% CI) | -                     | 2.3 (0.3 to 18.2) | 3.3 (1.4 to 7.8)  | 3.2 (1.4 to 7.3)  | 1 (Ref.)   |
| <b>Proteinuria<sup>M3</sup></b>    | n (%)            | 2 (2.4)               | 9 (0.7)           | 32 (0.5)          | 43 (0.6)          | 171 (0.3)  |
|                                    | OR (95% CI)      | 7.3 (1.8 to 29.8)     | 2.2 (1.1 to 4.3)  | 1.6 (1.1 to 2.3)  | 1.8 (1.3 to 2.5)  |            |
|                                    | Adj. OR (95% CI) | 12.3 (2.8 to 53.6)    | 2.4 (1.1 to 5.2)  | 1.6 (1.0 to 2.5)  | 1.8 (1.2 to 2.6)  | 1 (Ref.)   |
| <b>UTI<sup>M5</sup></b>            | n (%)            | 0 (0.0)               | 6 (0.5)           | 21 (0.4)          | 27 (0.4)          | 75 (0.1)   |
|                                    | OR (95% CI)      | -                     | 3.3 (1.4 to 7.7)  | 2.4 (1.5 to 3.9)  | 2.5 (1.6 to 3.9)  |            |
|                                    | Adj. OR (95% CI) | -                     | 4.1 (1.7 to 10.2) | 2.7 (1.6 to 4.6)  | 2.9 (1.8 to 4.8)  | 1 (Ref.)   |
| <b>Pyelonephritis<sup>M6</sup></b> | n (%)            | 0 (0.0)               | 8 (0.6)           | 27 (0.5)          | 35 (0.5)          | 45 (0.1)   |
|                                    | OR (95% CI)      | -                     | 7.4 (3.5 to 15.8) | 5.1 (3.2 to 8.3)  | 5.5 (3.5 to 8.5)  |            |
|                                    | Adj. OR (95% CI) | -                     | 9.6 (4.2 to 21.9) | 5.8 (3.4 to 10.0) | 6.3 (3.8 to 10.4) | 1 (Ref.)   |

\* Haemoglobin < 100 g/l. All the variables are adjusted according to multivariate models:

**M1:** Demographic variables (Table 1 – history of spontaneous abortions) + adequacy of prenatal care

**M2:** M1 + (hypertension and proteinuria)

**M3:** M1 + hypertension

**M4:** M3 – misuse of alcohol or drugs and pre-existing hypertension

**M5:** M1 – misuse of alcohol or drugs

**M6:** M1 – pre-existing hypertension

1  
2  
3  
4 There were no statistically significant differences between the groups as regards PIH (3.2% [n=233] vs.  
5  
6 4.2% [n=2158]), chorioamnionitis (0.6% [n=44] vs. 0.7% [n=377]), STIs (0.05% [n=10] vs. 0.02% [n=34])  
7  
8  
9 bleeding in early pregnancy (0.4% for both [n=27 vs. 190]), intrahepatic cholestasis of pregnancy  
10  
11 (1.1% [n=79] vs. 0.9% [n=460]) or fear of childbirth (1.3% for both [n=98 vs. 659]).  
12  
13

14  
15  
16  
17  
18  
19 Regarding pregnancy complications among teenagers, we evaluated their effects on other adverse  
20  
21 obstetric outcomes. Anaemia was a risk factor for very preterm birth (unadjusted odds ratio 2.5, 1.4  
22  
23 to 4.6), 5-min Apgar score of less than 7 (1.6, 1.2 to 2.1) and shoulder dystocia (2.8, 1.4 to 5.5).  
24  
25  
26 Proteinuria was found to be a risk factor for pre-eclampsia (7.7, 5.4 to 10.8), but not for eclampsia or  
27  
28  
29 adverse neonatal outcomes. UTI did not affect the risk of adverse obstetric outcomes, whereas  
30  
31  
32 pyelonephritis was a risk factor for IUGR (3.7, 1.1 to 12.0) among teenagers, but not adults.  
33  
34

### 35 **Delivery outcomes**

36  
37  
38 The estimated risks (adj. OR) among all teenagers (13–19 years of age) compared with the reference  
39  
40 women were: Caesarean section 0.6 (0.6 to 0.7), operative vaginal delivery 0.6 (0.6 to 0.7), anal  
41  
42 sphincter rupture 0.4 (0.3 to 0.5) and breech presentation 0.7 (0.6 to 0.8) (Figure 1). However, when  
43  
44  
45 analysed in subgroups according to age, the estimated risks among 13–15-year-olds did not differ  
46  
47  
48 significantly from those in the reference group, except for Caesarean section.  
49  
50

51  
52 The percentages of planned Caesarean sections were similar among 13–15-year-olds and the  
53  
54 reference women (4.8 % [n=4] vs. 4.5% [n=2301]), but significantly lower among 16–17- and 18–19-  
55  
56 year-olds (2.4 % [n=30] and 3.2% [n=192], respectively). Regarding urgent Caesarean sections, the  
57  
58  
59  
60

1  
2  
3 frequencies were lower among all teenagers (7.2% [n=524] vs. 11.7% [n=5996]) and descended  
4  
5 according to age. In the case of emergency Caesarean sections, however, there were no significant  
6  
7 differences (1.1% [n=83] vs. 1.5% [n=766]).  
8  
9

10  
11 The frequencies of induction of labour and use of oxytocin during labour were similar in the teenagers  
12  
13 and reference women (16.8% 1226 vs. 17.2% 8788 and 49.7% [n=3630] vs. 50.3% [n=25744]  
14  
15 respectively). Episiotomy was performed less often in all teenage groups (39.1% [n=2861] vs. 41.2%  
16  
17 [n=21511]), although the difference was non-significant as regards 13—15-year-olds. Combined  
18  
19 regional anaesthesia was used significantly more often in all teenage groups compared with the  
20  
21 reference women (72.5% [n=5296] vs. 66.3% [n=33907]).  
22  
23  
24  
25  
26

27  
28 The incidence of uterine curettage after childbirth was lower among all 13—19-year-olds (0.5% [n=40]  
29  
30 vs. 0.9% [n=446]), but the significance disappeared when the subgroups were analysed separately.  
31  
32 Differences in the incidence of abnormal bleeding after childbirth were non-significant between 13—  
33  
34 15-year-olds (4.8% [n=4]) and the reference group (3.5% [n=1772]), but significantly lower among  
35  
36 16—17- and 18—19-year-olds (1.8% [n=22] and 2.1% [n=125] respectively). No differences were seen  
37  
38 as regards shoulder dystocia (0.2% for both [n=9 vs. 116]), placental abruption (0.2% for both [n=19 vs.  
39  
40 13]), uterine rupture (none vs. 0.05% [n=24]), abnormal bleeding during delivery (0.2% for both [n=3  
41  
42 vs. 135]) and postpartum infection (0.5% [n=36] vs. 0.4% [n=229]).  
43  
44  
45  
46  
47

## 48 Neonatal outcomes

49  
50 Table 4 summarises the incidences of various neonatal outcomes. No significant differences emerged  
51  
52 between the 13—19- and 25—29-year-olds as regards the proportions with a 5-min Apgar score of  
53  
54 less than 7 (2.5% [n=161] vs. 2.8% [n=1213]), cord blood pH below 7.05 at birth (1.9% [n=139] vs. 1.5%  
55  
56  
57  
58  
59  
60



1  
2  
3 [n=767]), resuscitation of the newborn (1.0% for both [n= 70 vs. 522]), use of a respirator (1.0% [n=74]  
4  
5  
6 vs. 0.9% [n=456]) or use of antibiotics (6.6% [n=481] vs. 6.8% [n=3498]). Phototherapy was used  
7  
8 similarly among all groups, although the frequency was significantly lower among 18—19-year-olds  
9  
10 compared with the reference women (5.9% [n=443] vs. 6.8% [n=3457]).  
11  
12  
13  
14  
15  
16  
17  
18  
19  
20  
21  
22  
23  
24  
25  
26  
27  
28  
29  
30  
31  
32  
33  
34  
35  
36  
37  
38  
39  
40  
41  
42  
43  
44  
45  
46  
47  
48  
49  
50  
51  
52  
53  
54  
55  
56  
57  
58  
59  
60

For peer review only

Table 4: Neonatal outcomes according to age group

|                                                |                  | <u>Maternal age in years</u>   |                  |                  |                  |             |
|------------------------------------------------|------------------|--------------------------------|------------------|------------------|------------------|-------------|
|                                                |                  | 13–15                          | 16–17            | 18–19            | All teenagers    | 25–29       |
| <b>n</b>                                       |                  | 84                             | 1234             | 5987             | 7305             | 51 142      |
| <b>Extremely preterm &lt;28 w<sup>M3</sup></b> | n (%)            | 2 (2.4)                        | 3 (0.2)          | 23 (0.4)         | 28 (0.4)         | 149 (0.3)   |
|                                                | OR (95% CI)      | 8.5 (2.1 to 35.1)              | 0.8 (0.3 to 2.7) | 1.3 (0.9 to 2.1) | 1.3 (0.9 to 2.0) |             |
|                                                | Adj. OR (95% CI) | 5.4 (0.7 to 41.5)              | 0.3 (0.0 to 2.4) | 1.1 (0.6 to 1.9) | 1.0 (0.6 to 1.7) | 1 (Ref.)    |
| <b>Preterm &lt;37 w<sup>M2</sup></b>           | n (%)            | 11 (13.1)                      | 68 (5.5)         | 296 (4.9)        | 375 (5.1)        | 2440 (4.8)  |
|                                                | OR (95% CI)      | 3.0 (1.6 to 5.7)               | 1.1 (0.9 to 1.5) | 1.0 (0.9 to 1.2) | 1.1 (1.0 to 1.2) |             |
|                                                | Adj. OR (95% CI) | 2.5 (1.2 to 5.3)               | 1.0 (0.8 to 1.4) | 0.9 (0.8 to 1.1) | 1.0 (0.8 to 1.1) | 1 (Ref.)    |
| <b>SGA<sup>M1</sup></b>                        | n (%)            | 2 (2.4)                        | 52 (4.2)         | 199 (3.3)        | 253 (3.5)        | 1262 (2.5)  |
|                                                | OR (95% CI)      | 0.9 (0.2 to 3.5)               | 1.7 (1.3 to 2.3) | 1.4 (1.2 to 1.6) | 1.4 (1.2 to 1.6) |             |
|                                                | Adj. OR (95% CI) | 0.5 (0.1 to 2.1)               | 1.2 (0.9 to 1.6) | 1.0 (0.8 to 1.1) | 1.0 (0.8 to 1.2) | 1 (Ref.)    |
| <b>IUGR<sup>M1</sup></b>                       | n (%)            | 0 (0.0)                        | 40 (3.2)         | 145 (2.4)        | 185 (2.5)        | 570 (1.1)   |
|                                                | OR (95% CI)      | -                              | 3.0 (2.1 to 4.1) | 2.2 (1.8 to 2.6) | 2.3 (1.9 to 2.7) |             |
|                                                | Adj. OR (95% CI) | -                              | 2.3 (1.6 to 3.2) | 1.7 (1.4 to 2.1) | 1.8 (1.5 to 2.1) | 1 (Ref.)    |
| <b>Intensive care<sup>M4</sup></b>             | n (%)            | 19 (22.6)                      | 138 (11.2)       | 654 (10.9)       | 811 (11.1)       | 5566 (10.9) |
|                                                | OR (95% CI)      | 2.4 (1.4 to 4.0)               | 1.0 (0.9 to 1.2) | 1.0 (0.9 to 1.1) | 1.0 (0.9 to 1.1) |             |
|                                                | Adj. OR (95% CI) | 1.9 (1.0 to 3.4)               | 0.9 (0.7 to 1.1) | 0.9 (0.8 to 1.0) | 0.9 (0.8 to 1.0) | 1 (Ref.)    |
| <b>Stillbirth/neonatal death<sup>M5</sup></b>  | n (%)            | 2 (2.4)                        | 4 (0.3)          | 34 (0.6)         | 40 (0.5)         | 180 (0.4)   |
|                                                | OR (95% CI)      | 6.9 (1.7 to 28.3)              | 0.9 (0.3 to 2.5) | 1.6 (1.1 to 2.3) | 1.6 (1.1 to 2.2) |             |
|                                                | Adj. OR (95% CI) | 0.4 (0.0 to 5.1) <sup>M6</sup> | 0.6 (0.1 to 2.7) | 1.4 (0.8 to 2.4) | 1.2 (0.7 to 2.1) | 1 (Ref.)    |

All the variables are adjusted according to multivariate models:

**M1:** Demographic variables (Table 1 – history of spontaneous abortions) + adequacy of prenatal care, gestational diabetes, PIH, placental abruption, chorioamnionitis, pre-eclampsia, eclampsia

**M2:** M1 + anaemia + history of spontaneous abortions

**M3:** M2 – misuse of alcohol or drugs

**M4:** M1 + preterm birth and IUGR

**M5:** M4 – (misuse of alcohol or drugs and pre-existing hypertension)

**M6:** M5 – (BMI and pre-existing diabetes)

## Adequacy of prenatal care

To investigate the effect of low antenatal clinic attendance on obstetric outcomes, we performed a subgroup analysis of 210 teenagers with inadequate prenatal care compared with 6 905 teenagers with adequate care. Teenagers with inadequate prenatal care were significantly more likely to be single (33.3% [n=67] vs. 22.1% [n=1526],  $P<0.001$ ) and to live in an urban area (73.9% [n=155] vs. 66.4% [n=485],  $P=0.03$ ). Although the rate of smoking during pregnancy did not differ statistically significantly in the two groups (43.9% [n=92] vs. 37.3% [n=2576],  $P=0.07$ ), teenagers with inadequate prenatal care were less likely to quit smoking during the 1<sup>st</sup> trimester (6.3% [n=13] vs. 12.8% [n=884],  $P=0.008$ ). No differences between the groups emerged as regards being underweight (11.4% [n=138] vs. 10.4% [n=718],  $P=0.62$ ) or obese (4.7% [n=10] vs. 6.3% [n=435],  $P=0.40$ ), or as regards misuse of alcohol or drugs during pregnancy (0.5% [n=1] vs. 1.2% [n=81],  $P=0.73$ ).

Teenagers with inadequate prenatal care were at significantly higher risks of eclampsia and UTI, even after adjustment for confounding factors (Table 5). No excess risks as regards delivery complications were seen. The increased risk of perinatal and neonatal mortality was almost entirely explained by premature births among teenagers with inadequate prenatal care.

**Table 5: Maternal complications during pregnancy and neonatal outcomes according to adequacy of prenatal care**

|                                                |                  | Inadequate prenatal care | Adequate prenatal care |
|------------------------------------------------|------------------|--------------------------|------------------------|
|                                                | <b>n</b>         | <b>210</b>               | <b>6905</b>            |
| <b>PREGNANCY COMPLICATIONS</b>                 |                  |                          |                        |
| <b>Eclampsia<sup>M4</sup></b>                  | n (%)            | 2 (1.0)                  | 7 (0.1)                |
|                                                | OR (95% CI)      | 9.5 (2.0 to 45.9)        |                        |
|                                                | Adj. OR (95% CI) | 12.6 (2.6 to 62.6)       | 1 (Ref.)               |
| <b>UTI<sup>M3</sup></b>                        | n (%)            | 3 (1.4)                  | 24 (0.3)               |
|                                                | OR (95% CI)      | 4.2 (1.2 to 13.9)        |                        |
|                                                | Adj. OR (95% CI) | 5.8 (1.7 to 19.7)        | 1 (Ref.)               |
| <b>NEONATAL OUTCOMES</b>                       |                  |                          |                        |
| <b>Extremely preterm &lt;28 w<sup>M6</sup></b> | n (%)            | 5 (2.4)                  | 20 (0.3)               |
|                                                | OR (95% CI)      | 8.4 (3.1 to 22.6)        |                        |
|                                                | Adj. OR (95% CI) | 0.7 (0.1 to 5.1)         | 1 (Ref.)               |
| <b>Preterm &lt;37 w<sup>M1</sup></b>           | n (%)            | 35 (16.7)                | 319 (4.6)              |
|                                                | OR (95% CI)      | 4.1 (2.8 to 6.0)         |                        |
|                                                | Adj. OR (95% CI) | 1.1 (0.7 to 1.7)         | 1 (Ref.)               |
| <b>Apgar at 5 min &lt;7<sup>M2</sup></b>       | n (%)            | 10 (5.8)                 | 140 (2.3)              |
|                                                | OR (95% CI)      | 2.7 (1.4 to 5.1)         |                        |
|                                                | Adj. OR (95% CI) | 1.9 (0.8 to 4.3)         | 1 (Ref.)               |
| <b>Intensive care<sup>M2</sup></b>             | n (%)            | 33 (15.7)                | 733 (10.6)             |
|                                                | OR (95% CI)      | 1.6 (1.1 to 2.3)         |                        |
|                                                | Adj. OR (95% CI) | 1.0 (0.6 to 1.7)         | 1 (Ref.)               |
| <b>Pre/neonatal death<sup>M5</sup></b>         | n (%)            | 5 (2.4)                  | 28 (0.4)               |
|                                                | OR (95% CI)      | 6.0 (2.3 to 15.7)        |                        |
|                                                | Adj. OR (95% CI) | 0.7 (0.1 to 7.1)         | 1 (Ref.)               |

All the variables are adjusted according to multivariate models:

**M1:** Demographic variables (Table 1 – pre-existing hypertension and diabetes)

**M2:** M1 + preterm birth – history of spontaneous abortions

**M3:** M1 – misuse of alcohol or drugs – history of spontaneous abortions

**M4:** M1 – misuse of alcohol or drugs, BMI and history of spontaneous abortions

**M5:** M2 – misuse of alcohol or drugs

Missing data as regards confounding variables in inadequate vs. adequate prenatal care group: cohabitation 17.1% vs. 9.7%, smoking 10.0% vs. 2.2%, BMI 19.5% vs. 2.1%.

## DISCUSSION

Our comprehensive population-based study indicated that pregnant teenagers are at an increased risk of eclampsia, proteinuria, cystitis, pyelonephritis and anaemia. The youngest teenagers also had a higher risk of pre-eclampsia. However, teenagers were more likely to have a normal vaginal delivery without excessive risks of delivery complications when compared with women “at the best age for delivery” (25—29 years). Regarding neonatal outcomes, the risk of preterm birth was increased among the youngest teenagers, whereas older teenagers were at risk of having SGA infants and infants with IUGR. An increased risk of stillbirth/neonatal death was also found. Inadequate prenatal care among teenagers increased the risks of eclampsia, UTI and several adverse neonatal outcomes. Confounding factors affected the risks of most neonatal outcomes, but their roles as regards maternal complications were less significant.

The registers used for our study are of high quality and have been shown to be in accordance with delivery records.<sup>20</sup> We were able to investigate a number of factors that have been sparsely reported in connection with teenage pregnancies, such as proteinuria, cystitis and pyelonephritis during pregnancy, fear of childbirth and pain relief during delivery. Our study was nationwide, giving a complete and realistic reflection of the situation regarding obstetric challenges among all teenage pregnancies during the study period.

In Finland, prenatal care, including routine visits to general practitioners and nurses/midwives, is provided free of charge by municipalities and used by virtually all pregnant women.<sup>25</sup> Specialised

1  
2  
3 maternity units in public hospitals take care of practically all obstetric patients and births. In addition,  
4  
5 fetal screening including early ultrasonography with a nuchal translucency scan, blood tests and  
6  
7 structural ultrasonography is offered to all pregnant women.<sup>26</sup> Thus, the opportunity to receive  
8  
9 comprehensive prenatal care is available to all regardless of socioeconomic status or residence. This  
10  
11 minimises the confounding effects which often complicate studies of this kind. We also divided  
12  
13 teenagers into categories by age. Although evidence suggests that the risks of neonatal problems are  
14  
15 higher in younger, biologically immature adolescents,<sup>15-17</sup> the majority of studies, especially those on  
16  
17 maternal outcomes, have involved the use of a dichotomised study setting, neglecting the different  
18  
19 stages of biological and psychological maturation in adolescents.<sup>10 12 27-32</sup> The importance of choosing  
20  
21 the right reference group cannot be underestimated. The age of 20—24 years has often been used for  
22  
23 reference, but age groups of even 20—39 years are seen. Childbearing has commonly been  
24  
25 postponed in recent decades. The mean age of primigravid women in Finland was approximately 28  
26  
27 years during the study period; thus we chose primigravid women of 25—29 years of age as a  
28  
29 reference group.  
30  
31  
32  
33  
34  
35  
36  
37  
38

39 Our study is retrospective, which remains a limitation. The reliability of the data depends on the  
40  
41 accuracy of reporting. There was more missing data regarding confounding effects in the teenage  
42  
43 group, as in the subgroup of teenagers with inadequate prenatal care. We could not look at the  
44  
45 socioeconomic or educational status of adolescents in this study. The MBR includes information on  
46  
47 maternal occupation, which is, however, less relevant as regards teenagers and young adults.  
48  
49

50 Unfortunately, there is no information on fathers in the MBR as a result of confidentiality rules. If  
51  
52 socioeconomic status had been used in logistic regression analysis as a confounding factor, the risks of  
53  
54 some outcomes among teenagers might have been smaller. We were not able to obtain information  
55  
56  
57  
58  
59  
60

1  
2  
3 on weight gain during pregnancy. Poor weight gain is a known risk factor of adverse neonatal  
4  
5  
6 outcomes, such as low birth weight. Our study group of 13—15-year-olds was small in number, thus  
7  
8 leading to lack of power in detecting risks of rare outcomes. However, we felt it important to analyse  
9  
10 this group separately to discover the effect of very young age on the risk of adverse obstetric  
11  
12 outcomes.  
13  
14

### 15 16 17 **Relevant results in relation to those of other studies** 18

19  
20 Overall, there was a high rate of attendance at antenatal clinics, which was expected, as antenatal  
21  
22 care is offered free of charge to all pregnant mothers. It can be speculated that women not reached  
23  
24 by the antenatal care system may be socially disadvantaged in various areas of life. Poor  
25  
26 socioeconomic status is often known to precede teenage pregnancy.<sup>33 34</sup> This view is supported by  
27  
28 our finding that teenagers smoked and were diagnosed with misuse of alcohol or drugs significantly  
29  
30 more often than reference women. Similar findings come from many parts of the developed world,<sup>9</sup>  
31  
32  
33  
34  
35  
36  
37  
38  
39  
40  
41  
42  
43  
44  
45  
46  
47  
48  
49  
50  
51  
52  
53  
54  
55  
56  
57  
58  
59  
60  
11 35 36 whereas early marriage and childbirth are more common in other, often developing parts of  
the world, thus leading to different social circumstances and possibly different pregnancy outcomes.

The increased risk of anaemia seen among teenagers is in accordance with findings from several  
earlier studies.<sup>10-12 29</sup> Physical growth and menstruation results in an increase in iron requirements  
that is often not met by nutrition. This leads to a negative iron balance and makes teenagers more  
susceptible to anaemia during pregnancy.<sup>37</sup> Poor fetal outcomes may occur, especially in cases of  
severe or first trimester anaemia.<sup>37 38</sup> In our study, anaemia was a risk factor of very preterm birth, a  
low 5-min Apgar score and shoulder dystocia.

1  
2  
3 Previous studies carried out in industrialised countries have revealed no excess risks of pre-eclampsia  
4  
5 or PIH among adolescents,<sup>9-12</sup> whereas higher risks have been reported in developing countries.<sup>14 31</sup>  
6  
7

8 Our results are partly contradictory, indicating a higher risk of pre-eclampsia among the youngest  
9  
10 teenagers. The relatively small number of pregnant mothers aged 13—15 years in our study places  
11  
12 some uncertainty on this finding. In two earlier studies, younger and older adolescents were  
13  
14 distinguished. A large Latin-American cross-sectional study revealed an increasing rate of pre-  
15  
16 eclampsia with descending age, but there was no significant difference in risk after adjustment for  
17  
18 confounding factors.<sup>16</sup> A French study revealed a lower risk among teenagers, but the number of very  
19  
20 young teenagers was even smaller than in the present study.<sup>11</sup>  
21  
22  
23  
24  
25

26 Our results confirm findings in earlier studies, showing an elevated risk of eclampsia among pregnant  
27  
28 teenagers.<sup>39 40</sup> A report by the National Center for Health Statistics in the US showed an increasing  
29  
30 trend in frequency with descending age (0.6% in 10—14-year-olds and 0.3% among 25—29-year-  
31  
32 olds).<sup>41</sup> Because of a smaller number of cases and rarity of the condition, we could not evaluate such a  
33  
34 trend. The essential role of prenatal care in the prevention of eclampsia has been previously  
35  
36 emphasised,<sup>42</sup> although not in studies confined to teenagers. We found a marked 12-fold risk of  
37  
38 eclampsia among teenagers with inadequate versus adequate care, highlighting the importance of  
39  
40 adequate prenatal care in teenage pregnancies.  
41  
42  
43  
44  
45  
46

47 We found an increasing risk of proteinuria in pregnancy with descending age. An earlier study on the  
48  
49 risk factors of proteinuria during pregnancy revealed a 1.5-fold risk among women below the age of  
50  
51 20.<sup>43</sup> Although the outcome of isolated proteinuria is mostly favourable, it is sometimes known to  
52  
53 precede pre-eclampsia and even eclampsia<sup>44 45</sup> and has been associated with preterm birth.<sup>46</sup>  
54  
55  
56

57 Whether or not isolated proteinuria is part of the same disease spectrum as pre-eclampsia is  
58  
59  
60



1  
2  
3 controversial.<sup>43 47</sup> In our study, proteinuria was found to be a risk factor as regards pre-eclampsia, but  
4  
5 not eclampsia or adverse neonatal outcome.  
6  
7

8  
9 Earlier studies on UTI and pyelonephritis in pregnant teenagers are sparse. In two UK studies 1.5- to  
10  
11 1.6-fold risks of UTI<sup>10</sup> and pyelonephritis<sup>9</sup> were reported among all teenagers. In contrast, no excess  
12  
13 risk was found in a Latin American study in which teenagers were analysed in subgroups by age.<sup>16</sup> Our  
14  
15 findings suggest higher risks of both UTI and pyelonephritis, with a trend toward a higher incidence  
16  
17 with descending age. However, no cases were found among teenagers of 13–15 years of age, possibly  
18  
19 because of the relative rarity of these diagnoses. Only a hypothesis for the reason behind the  
20  
21 increased risks has been presented – reduced resistance to infections in pregnant teenagers.<sup>10</sup> We  
22  
23 speculate that teenagers might be sexually more active during pregnancy compared with older  
24  
25 women, placing them at a higher risk of UTI. In addition, poorer recognition of symptoms of UTI could  
26  
27 lead to delayed care and explain the increased risk of pyelonephritis. UTIs, and pyelonephritis in  
28  
29 particular, have been associated with higher risks of adverse neonatal outcomes,<sup>48 49</sup> although they  
30  
31 are preventable with early detection and antimicrobial care.<sup>50</sup> Pyelonephritis was a risk factor of IUGR  
32  
33 among teenagers, but not adults in our study.  
34  
35  
36  
37  
38  
39  
40  
41

42 Regarding other infections, our results do not support earlier findings of a higher risk of  
43  
44 chorioamnionitis among adolescents compared with adult women.<sup>10 12</sup>  
45  
46  
47

48 Our findings of lower or similar risks of delivery complications and a higher incidence of vaginal  
49  
50 deliveries among teenagers are in line with findings in most studies in the developed world.<sup>9-12</sup>  
51  
52

53 Opposite findings come mainly from studies in developing countries.<sup>16 32</sup> The use of pain relief,  
54  
55  
56  
57  
58  
59  
60

1  
2  
3 especially combined anaesthetic analgesia, was high in all groups and was used even more often in  
4 teenagers compared with older women. This is in contrast to the results of a UK study.<sup>9</sup>  
5  
6

7  
8  
9 Three large retrospective cohort studies carried out in the US and Latin America revealed 1.2- to 2.0-  
10 fold risks of preterm birth and 1.1- to 1.5-fold risks of SGA infants among teenagers, with an  
11 increasing trend with descending age.<sup>15-17</sup> Only one of these studies showed an increased risk (1.2-  
12 fold) of IUGR among adolescents aged 15 years or less compared with older mothers.<sup>17</sup> Elevated (1.5-  
13 fold) risks of stillbirth and/or neonatal death were found among the youngest teenagers. However,  
14 among older teenagers and after adjustment for gestational age, the risks were either lower or non-  
15 significant.<sup>15-17</sup> These findings were largely confirmed in our study, although some differences were  
16 seen, possibly as a result of a smaller study population and the lack of socioeconomic status as a  
17 confounding factor. In addition, we found an excess risk of preterm birth only among the youngest  
18 teenagers. The lack of risk among older teenagers might be explained by the overall high quality and  
19 quantity of prenatal care in Finland.  
20  
21  
22  
23  
24  
25  
26  
27  
28  
29  
30  
31  
32  
33  
34  
35

36  
37 In accordance with the results of several recent studies,<sup>18 19 51</sup> we found higher risks of adverse  
38 neonatal outcomes, including an excess risk of neonatal/infant mortality among teenagers with  
39 inadequate prenatal care.  
40  
41  
42  
43  
44  
45

## 46 **Unanswered questions and implications**

47  
48

49 Our results add to existing literature, showing higher risks of various maternal complications among  
50 teenagers, often displaying an increasing trend with descending age. An increased risk of proteinuria  
51 during pregnancy was found, an outcome not analysed in past studies dealing with teenage  
52 pregnancy. Confirmation of this finding and its possible influence on other, more serious obstetric  
53  
54  
55  
56  
57  
58  
59  
60

1  
2  
3 outcomes is required. The effect of prenatal care on maternal outcomes should also be further  
4  
5 analysed in the future. Clinical studies on the mode of delivery and its complications would shed more  
6  
7 light on whether or not adolescents have better myometrial function compared with older women or  
8  
9 whether the higher incidence of uncomplicated vaginal births is a consequence of other factors, such  
10  
11 as more attentive care of adolescents. In addition to immediate obstetric risks, studies on long-term  
12  
13 consequences indicate a higher incidence of morbidity and preterm mortality among both teenage  
14  
15 mothers and their children,<sup>1 2 4</sup> and these risks should be examined in greater detail in the future.  
16  
17  
18  
19  
20

21  
22  
23  
24  
25 The present study has practical implications: in addition to prevention and treatment of anaemia and  
26  
27 eclampsia, and screening and counselling in connection with proteinuria, cystitis and pyelonephritis  
28  
29 are important among pregnant adolescents. The higher risk of pre-eclampsia among the youngest  
30  
31 teenagers should also be kept in mind. Teenagers in a welfare society are not a risk group as regards  
32  
33 delivery complications, and neonatal outcomes are mainly good. However, the younger the expectant  
34  
35 mother, the greater are the risks of several maternal and neonatal complications. Adequacy of  
36  
37 prenatal care is of great importance in preventing serious adverse obstetric outcomes. Thus, extra  
38  
39 efforts should be made to reach all pregnant teenagers and enrol them in adequate maternity care in  
40  
41 early pregnancy.  
42  
43  
44  
45  
46  
47  
48  
49  
50  
51  
52  
53  
54  
55  
56  
57  
58  
59  
60

## FOOTNOTES

**Contributors:** OH, MG and SL had the initial research idea and all authors contributed to the design, interpretation and critical revision of data. All authors had full access to the data and take responsibility of the integrity of the data and accuracy of the data analysis. SL carried out the analysis and wrote the drafts of the paper with important intellectual input from all coauthors. All authors have approved the final version of the manuscript submitted for publication. OH and SL act as guarantors.

**Funding statement:** Financial support from Helsinki University Central Hospital Research Funds and Clinical Graduate School in Pediatrics/Gynecology, University of Helsinki, Finland are gratefully acknowledged.

**Competing interests:** All authors have completed the ICMJE uniform disclosure form at [www.icmje.org/coi\\_disclosure.pdf](http://www.icmje.org/coi_disclosure.pdf) and declare: no support from any organisation for the submitted work; no financial relationships with any organisations that might have an interest in the submitted work in the previous three years; no other relationships or activities that could appear to have influenced the submitted work.

**Ethical approval:** No ethical approval was required for the present study.

**Data sharing:** No additional data available. Researchers can apply for the authorisation for the use of same health register data for scientific research from the register keeping organization (THL National Institute for Health and Welfare).

## FIGURE LEGENDS

Figure 1: Frequencies (%) of operative delivery and other delivery outcomes according to age group.

For peer review only

## REFERENCES

1. Paranjothy S, Broughton H, Adappa R, Fone D. Teenage pregnancy: who suffers? *Arch Dis Child*. 2009;94:239-45.
2. E-Risk Study T. Teen-aged mothers in contemporary Britain. *J Child Psychol Psychiatry*. 2002;43:727-42.
3. Olausson PO, Haglund B, Weitoft GR, Cnattingius S. Teenage childbearing and long-term socioeconomic consequences: a case study in Sweden. *Fam Plann Perspect*. 2001;33:70-4.
4. Otterblad Olausson P, Haglund B, Ringback Weitoft G, Cnattingius S. Premature death among teenage mothers. *BJOG*. 2004;111:793-9.
5. Olausson PO, Cnattingius S, Haglund B. Teenage pregnancies and risk of late fetal death and infant mortality. *Br J Obstet Gynaecol*. 1999;106:116-21.
6. Perinatal statistics in the Nordic countries. Statistical Report 7/2012. [updated 2012 March 27; cited 2013 Apr 10]. Official Statistics of Finland, Health 2012. THL. Available from: [http://www.thl.fi/en-US/web/en/statistics/topics/reproductive\\_health/deliveries](http://www.thl.fi/en-US/web/en/statistics/topics/reproductive_health/deliveries).
7. Birth summary tables, England and Wales - 2010. [cited 2013 Aug 10]. Available from: <http://www.statistics.gov.uk/hub/population/births-and-fertility/live-births-and-stillbirths>.
8. Hamilton BE, Ventura SJ. Birth rates for U.S. teenagers reach historic lows for all age and ethnic groups. NCHS data brief, no 89. Hyattsville, MD: National Center for Health Statistics. 2012.
9. Gupta N, Kiran U, Bhal K. Teenage pregnancies: obstetric characteristics and outcome. *Eur J Obstet Gynecol Reprod Biol*. 2008;137:165-71.
10. Jolly MC, Sebire N, Harris J, Robinson S, Regan L. Obstetric risks of pregnancy in women less than 18 years old. *Obstet Gynecol*. 2000;96:962-6.
11. de Vienne CM, Creveuil C, Dreyfus M. Does young maternal age increase the risk of adverse obstetric, fetal and neonatal outcomes: a cohort study. *Eur J Obstet Gynecol Reprod Biol*. 2009;147:151-6.
12. Raatikainen K, Heiskanen N, Verkasalo PK, Heinonen S. Good outcome of teenage pregnancies in high-quality maternity care. *Eur J Public Health*. 2006;16:157-61.
13. Menacker F, Martin JA, MacDorman MF, Ventura SJ. Births to 10-14 year-old mothers, 1990-2002: trends and health outcomes. *Natl Vital Stat Rep*. 2004;53:1-18.

- 1  
2  
3 14. Rasheed S, Abdelmonem A, Amin M. Adolescent pregnancy in Upper Egypt. *Int J Gynaecol Obstet*. 2011;112:21-4.  
4  
5  
6  
7 15. Chen XK, Wen SW, Fleming N, Demissie K, Rhoads GG, Walker M. Teenage pregnancy and adverse  
8 birth outcomes: a large population based retrospective cohort study. *Int J Epidemiol*. 2007;36:368-73.  
9  
10 16. Conde-Agudelo A, Belizan JM, Lammers C. Maternal-perinatal morbidity and mortality associated  
11 with adolescent pregnancy in Latin America: Cross-sectional study. *Am J Obstet Gynecol*  
12 2005;192:342-9.  
13  
14  
15 17. Malabarey OT, Balayla J, Klam SL, Shrim A, Abenhaim HA. Pregnancies in young adolescent  
16 mothers: a population-based study on 37 million births. *J Pediatr Adolesc Gynecol*. 2012;25:98-102.  
17  
18  
19 18. Vieira CL, Coeli CM, Pinheiro RS, Brandao ER, Camargo KR, Jr, Aguiar FP. Modifying effect of  
20 prenatal care on the association between young maternal age and adverse birth outcomes. *J Pediatr*  
21 *Adolesc Gynecol*. 2012;25:185-9.  
22  
23  
24 19. Debiec KE, Paul KJ, Mitchell CM, Hitti JE. Inadequate prenatal care and risk of preterm delivery  
25 among adolescents: a retrospective study over 10 years. *Am J Obstet Gynecol*. 2010;203:122.e1-6.  
26  
27  
28 20. Gissler M, Haukka J. Finnish health and social welfare registers in epidemiological research. *Norsk*  
29 *Epidemiologi*. 2004;14:113-20.  
30  
31  
32 21. Gissler M, Teperi J, Hemminki E, Meriläinen J. Data quality after restructuring a nationwide  
33 medical birth registry. *Scand J Soc Med*. 1995;23:75-80.  
34  
35  
36 22. Pihkala J, Hakala T, Voutilainen P, Raivio K. [Characteristics of recent fetal growth curves in  
37 Finland]. *Duodecim*. 1989;105:1540-6. Finnish.  
38  
39  
40 23. Statistic Finland. 2012. Tilastokeskus - Statistikcentralen - Statistics Finland. [updated 2012 March  
41 27; cited 2013 Aug 10]. Available from: [www.tilastokeskus.fi/index\\_en.html](http://www.tilastokeskus.fi/index_en.html).  
42  
43  
44 24. Viisainen K. [Screening and collaboration in Maternity care. Guidelines 1999.]. Jyväskylä: STAKES  
45 Oppaita 34; 1999. Finnish.  
46  
47  
48 25. Perinatal statistics: parturients, deliveries and newborns 2011. Statistical Report 20/2012.  
49 [updated 2012 Dec 12; cited 2013 Apr 10]. Official Statistics of Finland, Health 2012. THL. Available  
50 from: [http://www.thl.fi/en-US/web/en/statistics/topics/reproductive\\_health/deliveries](http://www.thl.fi/en-US/web/en/statistics/topics/reproductive_health/deliveries).  
51  
52  
53 26. FINLEX. 2006. Government Degree on Screenings act 1339/2006. [cited 2013 Aug 10]. Available  
54 from: <http://www.finlex.fi/en/>.  
55  
56  
57 27. Bradford JA, Giles WB. Teenage pregnancy in western Sydney. *Aust N Z J Obstet Gynaecol*.  
58 1989;29:1-4.  
59  
60

- 1  
2  
3 28. Abu-Heija A, Ali AM, Al-Dakheil S. Obstetrics and perinatal outcome of adolescent nulliparous  
4 pregnant women. *Gynecol Obstet Invest.* 2002;53:90-2.  
5  
6  
7 29. Briggs MM, Hopman WM, Jamieson MA. Comparing pregnancy in adolescents and adults:  
8 obstetric outcomes and prevalence of anemia. *J Obstet Gynaecol Can.* 2007;29:546-55.  
9  
10  
11 30. Brown HL, Fan YD, Gonsoulin WJ. Obstetric complications in young teenagers. *South Med J.*  
12 1991;84:46-8.  
13  
14 31. Mahavarkar SH, Madhu CK, Mule VD. A comparative study of teenage pregnancy. *J Obstet*  
15 *Gynaecol.* 2008;28:604-7.  
16  
17  
18 32. Sagili H, Pramyia N, Prabhu K, Mascarenhas M, Reddi Rani P. Are teenage pregnancies at high risk?  
19 A comparison study in a developing country. *Arch Gynecol Obstet.* 2012;285:573-7.  
20  
21  
22 33. Imamura M, Tucker J, Hannaford P, da Silva MO, Astin M, Wyness L, et al. Factors associated with  
23 teenage pregnancy in the European Union countries: a systematic review. *Eur J Public Health.*  
24 2007;17:630-6.  
25  
26  
27 34. Vikat A, Rimpela A, Kosunen E, Rimpela M. Sociodemographic differences in the occurrence of  
28 teenage pregnancies in Finland in 1987-1998: a follow up study. *J Epidemiol Community Health.*  
29 2002;56:659-68.  
30  
31  
32 35. Cavazos-Rehg PA, Krauss MJ, Spitznagel EL, Schootman M, Cottler LB, Bierut LJ. Brief report:  
33 Pregnant by age 15 years and substance use initiation among US adolescent girls. *J Adolesc.*  
34 2012;35:1393-7.  
35  
36  
37 36. Hansen BT, Kjaer SK, Munk C, Tryggvadottir L, Sparen P, Hagerup-Jenssen M, et al. Early smoking  
38 initiation, sexual behavior and reproductive health - a large population-based study of Nordic women.  
39 *Prev Med.* 2010;51:68-72.  
40  
41  
42 37. Beard JL. Iron requirements in adolescent females. *J Nutr.* 2000;130(2S Suppl):440S-2S.  
43  
44  
45 38. Scanlon KS, Yip R, Schieve LA, Cogswell ME. High and low hemoglobin levels during pregnancy:  
46 differential risks for preterm birth and small for gestational age. *Obstet Gynecol.* 2000;96:741-8.  
47  
48  
49 39. Morikawa M, Cho K, Yamada T, Yamada T, Sato S, Minakami H. Risk factors for eclampsia in Japan  
50 between 2005 and 2009. *Int J Gynaecol Obstet.* 2012;117:66-8.  
51  
52  
53 40. Tebeu PM, Halle G, Lemogoum D, Simo Wambo AG, Kengne Fosso G, Fomulu JN. Risk factors for  
54 eclampsia among patients with pregnancy-related hypertension at Maroua Regional Hospital,  
55 Cameroon. *Int J Gynaecol Obstet.* 2012;118:254-6.  
56  
57  
58  
59  
60



- 1  
2  
3  
4  
5  
6  
7  
8  
9  
10  
11  
12  
13  
14  
15  
16  
17  
18  
19  
20  
21  
22  
23  
24  
25  
26  
27  
28  
29  
30  
31  
32  
33  
34  
35  
36  
37  
38  
39  
40  
41  
42  
43  
44  
45  
46  
47  
48  
49  
50  
51  
52  
53  
54  
55  
56  
57  
58  
59  
60
41. Menacker F, Martin JA, MacDorman MF, Ventura SJ. Births to 10-14 year-old mothers, 1990-2002: trends and health outcomes. *Natl Vital Stat Rep.* 2004;53:1-18.
42. Ansari MZ, Mueller BA, Krohn MA. Epidemiology of eclampsia. *Eur J Epidemiol.* 1995;11:447-51.
43. Macdonald-Wallis C, Lawlor DA, Heron J, Fraser A, Nelson SM, Tilling K. Relationships of risk factors for pre-eclampsia with patterns of occurrence of isolated gestational proteinuria during normal term pregnancy. *PLoS ONE.* 2011;6:e22115.
44. Knight M, Ukoss. Eclampsia in the United Kingdom 2005. *BJOG.* 2007;114:1072-8.
45. Morikawa M, Yamada T, Minakami H. Outcome of pregnancy in patients with isolated proteinuria. *Curr Opin Obstet Gynecol.* 2009;21:491-5.
46. Franceschini N, Savitz DA, Kaufman JS, Thorp JM. Maternal urine albumin excretion and pregnancy outcome. *Am J Kidney Dis.* 2005;45:1010-8.
47. Masuyama H, Suwaki N, Nakatsukasa H, Masumoto A, Tateishi Y, Hiramatsu Y. Circulating angiogenic factors in preeclampsia, gestational proteinuria, and preeclampsia superimposed on chronic glomerulonephritis. *Am J Obstet Gynecol.* 2006;194:551-6.
48. Mittal P, Wing DA. Urinary tract infections in pregnancy. *Clin Perinatol* 2005;32:749-64.
49. Farkash E, Weintraub AY, Sergienko R, Wiznitzer A, Zlotnik A, Sheiner E. Acute antepartum pyelonephritis in pregnancy: a critical analysis of risk factors and outcomes. *Eur J Obstet Gynecol Reprod Biol.* 2012;162:24-7.
50. Romero R, Oyarzun E, Mazor M, Sirtori M, Hobbins JC, Bracken M. Meta-analysis of the relationship between asymptomatic bacteriuria and preterm delivery/low birth weight. *Obstet Gynecol.* 1989;73:576-82.
51. Partridge S, Balayla J, Holcroft CA, Abenhaim HA. Inadequate prenatal care utilization and risks of infant mortality and poor birth outcome: a retrospective analysis of 28,729,765 U.S. deliveries over 8 years. *Am J Perinatol.* 2012;29:787-93.

1  
2  
3  
4  
5  
6  
7  
8  
9  
10  
11  
12  
13  
14  
15  
16  
17  
18  
19  
20  
21  
22  
23  
24  
25  
26  
27  
28  
29  
30  
31  
32  
33  
34  
35  
36  
37  
38  
39  
40  
41  
42  
43  
44  
45  
46  
47  
48  
49  
50  
51  
52  
53  
54  
55  
56  
57  
58  
59  
60

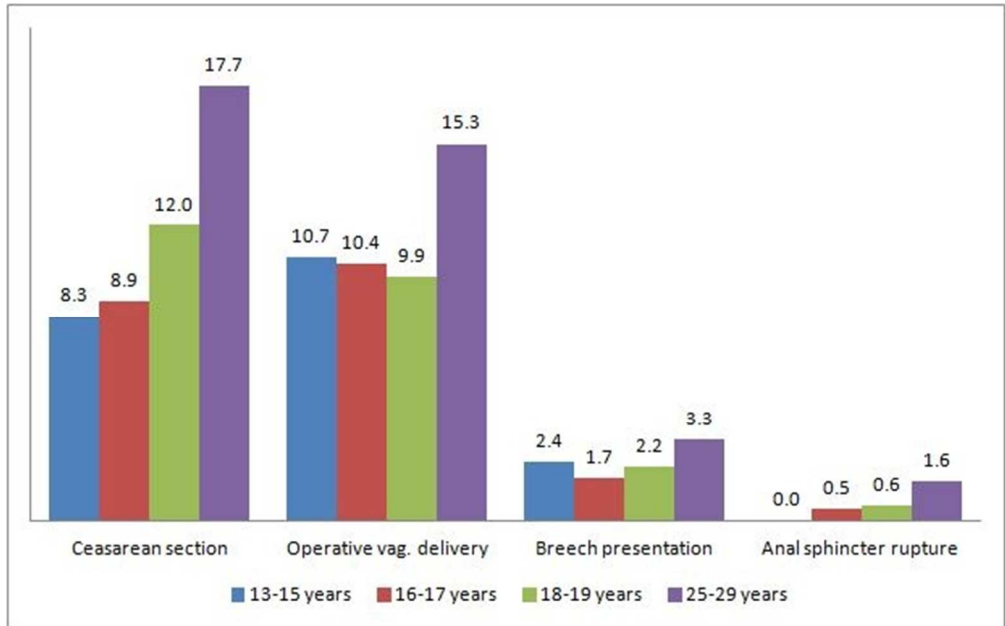

Fig. 1  
52x32mm (300 x 300 DPI)

review only

STROBE 2007 (v4) Statement—Checklist of items that should be included in reports of *cohort studies*

| Section/Topic                | Item # | Recommendation                                                                                                                                                                       | Reported on page # |
|------------------------------|--------|--------------------------------------------------------------------------------------------------------------------------------------------------------------------------------------|--------------------|
| Title and abstract           | 1      | (a) Indicate the study's design with a commonly used term in the title or the abstract                                                                                               | 1 and 2            |
|                              |        | (b) Provide in the abstract an informative and balanced summary of what was done and what was found                                                                                  | 2 and 3            |
| <b>Introduction</b>          |        |                                                                                                                                                                                      |                    |
| Background/rationale         | 2      | Explain the scientific background and rationale for the investigation being reported                                                                                                 | 5                  |
| Objectives                   | 3      | State specific objectives, including any prespecified hypotheses                                                                                                                     | 5 and 6            |
| <b>Methods</b>               |        |                                                                                                                                                                                      |                    |
| Study design                 | 4      | Present key elements of study design early in the paper                                                                                                                              | 2, 6 and 7         |
| Setting                      | 5      | Describe the setting, locations, and relevant dates, including periods of recruitment, exposure, follow-up, and data collection                                                      | 6                  |
| Participants                 | 6      | (a) Give the eligibility criteria, and the sources and methods of selection of participants. Describe methods of follow-up                                                           | 6                  |
|                              |        | (b) For matched studies, give matching criteria and number of exposed and unexposed                                                                                                  | -                  |
| Variables                    | 7      | Clearly define all outcomes, exposures, predictors, potential confounders, and effect modifiers. Give diagnostic criteria, if applicable                                             | 7 and 8            |
| Data sources/<br>measurement | 8*     | For each variable of interest, give sources of data and details of methods of assessment (measurement). Describe comparability of assessment methods if there is more than one group | 7 and 8            |
| Bias                         | 9      | Describe any efforts to address potential sources of bias                                                                                                                            | 6, 10 and 11       |
| Study size                   | 10     | Explain how the study size was arrived at                                                                                                                                            | 6                  |
| Quantitative variables       | 11     | Explain how quantitative variables were handled in the analyses. If applicable, describe which groupings were chosen and why                                                         | 7 and 8            |
| Statistical methods          | 12     | (a) Describe all statistical methods, including those used to control for confounding                                                                                                | 10 and 11          |
|                              |        | (b) Describe any methods used to examine subgroups and interactions                                                                                                                  | 10                 |
|                              |        | (c) Explain how missing data were addressed                                                                                                                                          | 11                 |
|                              |        | (d) If applicable, explain how loss to follow-up was addressed                                                                                                                       | -                  |
|                              |        | (e) Describe any sensitivity analyses                                                                                                                                                | -                  |
| <b>Results</b>               |        |                                                                                                                                                                                      |                    |

|                          |     |                                                                                                                                                                                                              |                    |
|--------------------------|-----|--------------------------------------------------------------------------------------------------------------------------------------------------------------------------------------------------------------|--------------------|
| Participants             | 13* | (a) Report numbers of individuals at each stage of study—eg numbers potentially eligible, examined for eligibility, confirmed eligible, included in the study, completing follow-up, and analysed            | 6                  |
|                          |     | (b) Give reasons for non-participation at each stage                                                                                                                                                         | 6                  |
|                          |     | (c) Consider use of a flow diagram                                                                                                                                                                           | -                  |
| Descriptive data         | 14* | (a) Give characteristics of study participants (eg demographic, clinical, social) and information on exposures and potential confounders                                                                     | 9, 11, 12          |
|                          |     | (b) Indicate number of participants with missing data for each variable of interest                                                                                                                          | 9 and 19           |
|                          |     | (c) Summarise follow-up time (eg, average and total amount)                                                                                                                                                  | -                  |
| Outcome data             | 15* | Report numbers of outcome events or summary measures over time                                                                                                                                               | 12-17              |
| Main results             | 16  | (a) Give unadjusted estimates and, if applicable, confounder-adjusted estimates and their precision (eg, 95% confidence interval). Make clear which confounders were adjusted for and why they were included | 12-17              |
|                          |     | (b) Report category boundaries when continuous variables were categorized                                                                                                                                    | 12, 14, 15, 17, 19 |
|                          |     | (c) If relevant, consider translating estimates of relative risk into absolute risk for a meaningful time period                                                                                             | -                  |
| Other analyses           | 17  | Report other analyses done—eg analyses of subgroups and interactions, and sensitivity analyses                                                                                                               | 18, 19             |
| <b>Discussion</b>        |     |                                                                                                                                                                                                              |                    |
| Key results              | 18  | Summarise key results with reference to study objectives                                                                                                                                                     | 20                 |
| <b>Limitations</b>       |     |                                                                                                                                                                                                              |                    |
| Interpretation           | 20  | Give a cautious overall interpretation of results considering objectives, limitations, multiplicity of analyses, results from similar studies, and other relevant evidence                                   | 22-25              |
| Generalisability         | 21  | Discuss the generalisability (external validity) of the study results                                                                                                                                        | 25 and 26          |
| <b>Other information</b> |     |                                                                                                                                                                                                              |                    |
| Funding                  | 22  | Give the source of funding and the role of the funders for the present study and, if applicable, for the original study on which the present article is based                                                | 27                 |

\*Give information separately for cases and controls in case-control studies and, if applicable, for exposed and unexposed groups in cohort and cross-sectional studies.

**Note:** An Explanation and Elaboration article discusses each checklist item and gives methodological background and published examples of transparent reporting. The STROBE checklist is best used in conjunction with this article (freely available on the Web sites of PLoS Medicine at <http://www.plosmedicine.org/>, Annals of Internal Medicine at <http://www.annals.org/>, and Epidemiology at <http://www.epidem.com/>). Information on the STROBE Initiative is available at [www.strobe-statement.org](http://www.strobe-statement.org).

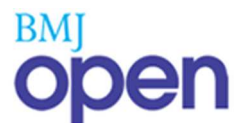

**Is teenage pregnancy an obstetric risk in a welfare society?  
A population-based study in Finland, from 2006 to 2011.**

|                                    |                                                                                                                                                                                                                                                                        |
|------------------------------------|------------------------------------------------------------------------------------------------------------------------------------------------------------------------------------------------------------------------------------------------------------------------|
| Journal:                           | <i>BMJ Open</i>                                                                                                                                                                                                                                                        |
| Manuscript ID:                     | bmjopen-2013-003225.R1                                                                                                                                                                                                                                                 |
| Article Type:                      | Research                                                                                                                                                                                                                                                               |
| Date Submitted by the Author:      | 29-Jun-2013                                                                                                                                                                                                                                                            |
| Complete List of Authors:          | Leppälahti, Suvi; Kätilöopisto Hospital, Ob&Gyn<br>Gissler, M; THL National Institute for Health and Welfare, Information<br>Mentula, Maarit; Kätilöopisto Hospital, Ob&Gyn<br>Heikinheimo, Oskari; Helsinki University Central Hospital, Obstetrics and<br>gynecology |
| <b>Primary Subject<br>Heading</b>: | Obstetrics and gynaecology                                                                                                                                                                                                                                             |
| Secondary Subject Heading:         | Epidemiology, Reproductive medicine, Sexual health                                                                                                                                                                                                                     |
| Keywords:                          | Maternal medicine < OBSTETRICS, PERINATOLOGY, PUBLIC HEALTH,<br>Adolescent                                                                                                                                                                                             |
|                                    |                                                                                                                                                                                                                                                                        |

SCHOLARONE™  
Manuscripts

1  
2  
3 1  
4  
5  
6  
7 2 **TITLE PAGE**  
8  
9  
10

11  
12 3 **Is teenage pregnancy an obstetric risk in a welfare society? A population-based study**  
13  
14  
15 4 **in Finland, from 2006 to 2011.**  
16  
17

18 5  
19  
20  
21 6 Suvi Leppälahti, Mika Gissler, Maarit Mentula, Oskari Heikinheimo  
22  
23

24 7  
25  
26  
27  
28 8 Department of Obstetrics and Gynecology/Kätilöopisto Hospital, *University of Helsinki and Helsinki*  
29  
30 9 *University Central Hospital*, P.O. Box 610, 00029-HUS, Helsinki, Finland. Suvi Leppälahti, specialising  
31  
32  
33 10 physician, Maarit Mentula, consultant gynaecologist, Oskari Heikinheimo, chief physician  
34  
35

36 11 Mika Gissler, THL National Institute for Health and Welfare, P.O. BOX 30, 00271 Helsinki, Finland.  
37

38  
39 12 Mika Gissler, research professor  
40  
41

42 13 Correspondence to: Oskari Heikinheimo: [oskari.heikinheimo@helsinki.fi](mailto:oskari.heikinheimo@helsinki.fi)  
43  
44

45 14 Keywords: Pregnancy, adolescence, complications, prenatal care  
46  
47

48  
49 15 Word count: 3994  
50  
51

52 16 Number of tables: 5  
53  
54

55 17 Number of figures: 1  
56  
57  
58  
59  
60

## 18 ABSTRACT

19 **Objective:** To assess obstetric outcomes in teenage pregnancies in a country with a low teenage  
20 delivery rate and comprehensive high-quality prenatal care.

21 **Design:** Retrospective population-based register study.

22 **Setting:** Finland.

23 **Participants:** All nulliparous teenagers (13–15 years [n=84], 16–17 years [n=1234], 18–19 years  
24 [n=5987]) and controls (25–29-year-old women [n=51 142]) with singleton deliveries in 2006–2011.

25 **Main outcome measures:** Risk of adverse obstetric outcomes adjusted for demographic factors and  
26 clinically relevant pregnancy complications, with a main focus on maternal pregnancy complications.

27 **Results:** Teenage mothers were more likely than controls to live in rural areas (16.0% [n=1168] vs.  
28 11.8% [n=6035]), smoke (36.4% [n=2661] vs. 7.0% [n=3580]) and misuse alcohol or drugs (1.1% [n=82]  
29 vs. 0.2% [n=96]) ( $p < 0.001$  for all). Teenagers made a good mean number of antenatal clinic visits (16.4  
30 vs. 16.5), but were more likely to have attended fewer than half of the recommended visits (3.0%  
31 [n=210] vs. 1.4% [n=716]).

32 Teenagers faced increased risks of several obstetric complications, e.g. anaemia (adjusted odds ratio  
33 1.8, 95% confidence interval 1.6 to 2.1), proteinuria (1.8, 1.2 to 2.6) urinary tract infection (UTI) (2.9,  
34 1.8 to 4.8) pyelonephritis (6.3, 3.8 to 10.4) and eclampsia (3.2, 1.4 to 7.3), the risks increasing with  
35 descending age for most outcomes. Elevated risks of pre-eclampsia (3.7, 1.5 to 9.0) and preterm  
36 delivery (2.5, 1.2 to 5.3) were also found among 13–15-year-olds. However, teenage mothers were

1  
2  
3 37 more likely to have vaginal delivery (1.9, 1.7 to 2.0) without complications. Inadequate prenatal care  
4  
5  
6 38 among teenagers was a risk factor of eclampsia (12.6, 2.6 to 62.6), UTI (5.8, 1.7 to 19.7) and adverse  
7  
8 39 neonatal outcomes.  
9

10  
11 **Conclusions:** Pregnant teenagers tended to be socioeconomically disadvantaged vs. controls and  
12 40  
13  
14 41 faced higher risks of various pregnancy complications. Special attention should be paid to enrolling  
15  
16  
17 42 teenagers into adequate prenatal care in early pregnancy.  
18

19  
20 43 Word count: 299  
21  
22  
23  
24 44  
25  
26  
27 45  
28  
29  
30 46  
31  
32  
33  
34 47  
35  
36  
37 48  
38  
39  
40 49  
41  
42  
43 50  
44  
45  
46 51  
47  
48  
49 52  
50  
51 53  
52  
53  
54 54  
55  
56  
57 55  
58  
59  
60



## ARTICLE SUMMARY

### Article focus

- Teenage pregnancy is associated with maternal anaemia and preterm birth. Association with other adverse obstetric outcomes, especially maternal complications, is less clear.
- Adequate antenatal care among teenagers has been shown to decrease adverse neonatal outcomes, but comprehensive care to all women was not offered in the previous study settings.
- We examined age-specific risks of adverse obstetric outcomes among teenagers, focusing on maternal pregnancy complications and the role of inadequate antenatal care.

### Key messages

- In addition to a higher risk of anaemia, elevated risks of urinary tract infection, pyelonephritis, proteinuria and eclampsia were found among teenagers as well as pre-eclampsia and preterm delivery among the youngest girls.
- Inadequate antenatal care may place teenagers at markedly elevated risks of urinary tract infection, eclampsia and adverse neonatal outcomes even in a welfare society offering high-quality care to all pregnant women.

### Strengths and limitations of this study

- The present study was nationwide, giving a realistic reflection of the situation regarding obstetric challenges among all teenage pregnancies during the study period.
- We were able to investigate a number of factors that have been sparsely reported in connection with teenage pregnancies, including proteinuria, cystitis and pyelonephritis during pregnancy, fear of childbirth and pain relief during delivery.
- Our study was retrospective and we could not look at the socioeconomic or educational status of women.

1  
2  
3  
4  
5  
6  
7  
8  
9  
10  
11  
12  
13  
14  
15  
16  
17  
18  
19  
20  
21  
22  
23  
24  
25  
26  
27  
28  
29  
30  
31  
32  
33  
34  
35  
36  
37  
38  
39  
40  
41  
42  
43  
44  
45  
46  
47  
48  
49  
50  
51  
52  
53  
54  
55  
56  
57  
58  
59  
60

## 82 INTRODUCTION

83 Pregnancy during teenage years is associated with socioeconomic and health inequalities as regards  
84 both mother and child,<sup>1-5</sup> including higher risks of deprivation,<sup>2</sup> behavioural and emotional  
85 difficulties,<sup>2</sup> maltreatment,<sup>1</sup> morbidity<sup>1</sup> and premature mortality.<sup>1 4</sup> Therefore, it is a global concern.  
86 Although most pronounced in developing countries, teenage pregnancy remains a significant problem  
87 also in the developed world. The incidence of teenage pregnancy ending in delivery varies widely,  
88 with Nordic countries having comparatively low rates: 6/1000 in Sweden<sup>6</sup> and 9/1000 in Finland,<sup>6</sup>  
89 compared with 24/1000 in England and Wales<sup>7</sup> and 34/1000 in the USA in 2010.<sup>8</sup>

90 Obstetric risks are often divided into categories of maternal complications, mode of delivery and its  
91 complications, and neonatal outcome. Teenage pregnancies are associated with maternal anaemia,<sup>9-</sup>  
92 <sup>12</sup> hypertensive problems<sup>13-15</sup> and preterm birth,<sup>16-19</sup> while low risks as regards delivery complications  
93 have been reported in studies carried out in industrialised countries.<sup>9-12 19</sup> However, results  
94 concerning several adverse outcomes vary largely, possibly as a result of the great number of  
95 confounding factors. Poor socioeconomic conditions,<sup>1 9 10</sup> risky health behaviour,<sup>9 12</sup> inadequate  
96 prenatal care<sup>18 20-21</sup> and biological immaturity<sup>16-18</sup> have been suggested as possible explanations for  
97 adverse obstetric outcomes.

98 Although the issue of teenage pregnancy has been widely studied, a consensus of opinion on obstetric  
99 risks is lacking. Comprehensive, age-specific studies concerning maternal complications remain  
100 sparse.<sup>9 17</sup> In addition, the role of prenatal care<sup>9</sup> in regard to these problems is not well established.

101 The objective of the present study was to investigate the risks of adverse obstetric outcomes in  
102 teenagers in a country with a low rate of adolescent births and comprehensive high-quality prenatal

1  
2  
3 103 care, with special focus on maternal complications during pregnancy. Secondly, we aimed to focus on  
4  
5  
6 104 the effect on these outcomes of a low number of visits to antenatal clinics.  
7  
8

## 9 105 **MATERIAL AND METHODS**

### 10 11 12 13 14 106 **Study population**

15  
16  
17 107 We identified all childbirths (n=354 833, of which 349 531 were singleton births) between 2006 and  
18  
19  
20 108 2011 in Finland using the national Medical Birth Register (MBR). Only singleton pregnancies of  
21  
22 109 nulliparous women (n=97 838) were included. Cases of major congenital anomaly (defined as major  
23  
24  
25 110 anatomical anomaly, chromosomal anomaly or congenital hypothyroidism)<sup>22</sup> were excluded (n=4149).  
26  
27 111 After exclusion, there was a total of 7305 singleton childbirths among 13–19-year-old nulliparous  
28  
29  
30 112 girls and women, further divided into three groups: 13–15-year-olds (n=84), 16–17-year-olds  
31  
32 113 (n=1234), and 18–19-year-olds (n=5987). Singleton deliveries (n=51 142) among women aged 25–29  
33  
34  
35 114 years served as reference material. Women with histories of abortion and miscarriage (n=11 703,  
36  
37 115 20.1%) were included.  
38  
39

### 40 41 116 **Data collection**

42  
43  
44 117 The study data were obtained from the MBR and the Hospital Discharge Register (HDR), maintained  
45  
46  
47 118 by the National Institute for Health and Welfare. Reporting to these national registers is obligatory  
48  
49 119 and the data has been shown to be valid and to reflect good coverage.<sup>23</sup>  
50  
51

52  
53 120 Data for the MBR is collected at all maternity hospitals in Finland.<sup>24</sup> It covers all live births and  
54  
55 121 stillbirths with a birth weight of 500 grams or more or with a gestational age of 22 weeks or more. The  
56  
57  
58 122 HDR contains information on all in-patient periods in public and private hospitals and out-patient  
59  
60

1  
2  
3 123 visits in the public sector. We collected the data separately for pregnancy and delivery (delivery  
4  
5  
6 124 complications include diagnoses reported from the start of delivery until 42 days postpartum). Each  
7  
8 125 complication was noted once per woman.  
9  
10

## 11 12 126 **Study variables**

13  
14  
15  
16 127 The choice of study variables was based on previous literature and clinical relevance. All study  
17  
18 128 variables are listed with ICD-10 codes, unless derived from the MBR in a separate check-box.  
19  
20

21  
22 129 **Maternal outcomes:** anaemia (haemoglobin below 100 g/l), pregnancy-induced hypertension (PIH)  
23  
24 130 (O13, O16), pre-eclampsia (O14), eclampsia, proteinuria (O12 excluding O12.0), gestational diabetes,  
25  
26  
27 131 intrahepatic cholestasis of pregnancy (O26.6), *placenta praevia*, sexually transmitted infections  
28  
29 132 (*Chlamydia trachomatis* [A56], *Neisseria gonorrhoeae* and syphilis [A51-A54]), urinary tract infection  
30  
31  
32 133 (UTI) (N30, N34, N39.0, O23.1–O23.4, O23.9), pyelonephritis (N10, N12, O23.0), chorioamnionitis  
33  
34 134 (O41.1), , bleeding in early pregnancy (O20) and fear of childbirth (O99.80).  
35  
36

37  
38 135 **Delivery outcomes:** mode of delivery (vaginal delivery, vaginal breech delivery, assisted vaginal  
39  
40 136 delivery [vacuum extraction or forceps] and Caesarean section [elective, urgent and emergency]),  
41  
42  
43 137 induction of labour, use of oxytocin, episiotomy, pain relief during delivery (regional anaesthesia,  
44  
45 138 other medication and non-medical pain relief), anal sphincter rupture, shoulder dystocia, placental  
46  
47  
48 139 abruption, uterine curettage, abnormal bleeding during (O67) and after delivery (O72), uterine  
49  
50 140 rupture (O71.0–O71.1) and postpartum infection (O85, O86, N71, N72).  
51  
52

53  
54 141 **Neonatal outcomes:** preterm birth (extremely preterm [<28 weeks] and preterm [<37 weeks of  
55  
56 142 gestation]), birth weight adjusted for gestational age according to the Finnish fetal growth curves<sup>25</sup>  
57  
58  
59  
60

1  
2  
3 143 (divided into small-for-gestational-age [SGA, defined as  $<-2$  SD], average-for-gestational-age [AGA]  
4  
5  
6 144 and large-for-gestational age [LGA, defined as  $> +2$  SD]), 5-min Apgar score below 7, cord blood pH  
7  
8 145 below 7.05 at birth, resuscitation of the newborn, use of a respirator, use of antibiotics, , admission to  
9  
10  
11 146 a neonatal intensive care unit, stillbirth (delivery of a stillborn at 22 weeks of gestation or later) and  
12  
13 147 neonatal death (death of a live-born at 0–6 days of age).  
14  
15

16  
17 148 **Demographic factors** are presented in Table 1. Of these, alcohol or drug misuse during pregnancy  
18  
19 149 (Z72.1–Z72.2), pre-existing diabetes (E10–E12, O24.0–O24.3) and pre-existing hypertension (I10,  
20  
21  
22 150 O10–O11) were derived from the HDR and other variables from the MBR.  
23  
24  
25  
26  
27  
28  
29  
30  
31  
32  
33  
34  
35  
36  
37  
38  
39  
40  
41  
42  
43  
44  
45  
46  
47  
48  
49  
50  
51  
52  
53  
54  
55  
56  
57  
58  
59  
60

151 **Table 1. Demographic characteristics according to age group (years)**

|                                                | 13–15     | 16–17      | 18–19       | All teenagers | 25–29         | P* for difference |
|------------------------------------------------|-----------|------------|-------------|---------------|---------------|-------------------|
| <b>n</b>                                       | 84        | 1234       | 5987        | 7305          | 51 142        |                   |
| <b>Cohabitation status</b>                     |           |            |             |               |               |                   |
| Married/cohabiting                             | 13 (15.5) | 598 (48.5) | 4248 (71.0) | 4859 (66.5)   | 45 262 (88.5) | <0.001            |
| Single                                         | 45 (53.6) | 471 (38.2) | 1132 (18.9) | 1644 (22.5)   | 2608 (5.1)    |                   |
| Missing data                                   | 26 (30.9) | 165 (13.3) | 607 (10.1)  | 802 (11.0)    | 3272 (6.4)    |                   |
| <b>Type of residence</b>                       |           |            |             |               |               |                   |
| Urban                                          | 52 (61.9) | 820 (66.5) | 3980 (66.5) | 4852 (66.4)   | 37589 (73.5)  | <0.001            |
| Densely populated                              | 14 (16.7) | 185 (15.0) | 1050 (17.5) | 1249 (17.1)   | 7313 (14.3)   |                   |
| Rural                                          | 16 (19.0) | 222(18.0)  | 930 (15.5)  | 1168 (16.0)   | 6035 (11.8)   |                   |
| Missing data                                   | 2 (2.4)   | 7 (0.5)    | 27 (0.5)    | 36 (0.5)      | 205 (0.4)     |                   |
| <b>Smoking during pregnancy</b>                |           |            |             |               |               |                   |
| Yes                                            | 28 (33.3) | 506 (41.3) | 2127 (35.5) | 2661 (36.4)   | 3580 (7.0)    | <0.001            |
| Quit during 1st trimester                      | 11(13.1)  | 157 (12.7) | 725 (12.1)  | 893 (12.2)    | 3324 (6.5)    |                   |
| Missing data                                   | 6 (7.1)   | 37 (3.0)   | 171 (2.9)   | 214 (2.9)     | 921 (1.8)     |                   |
| <b>Alcohol or drug misuse during pregnancy</b> |           |            |             |               |               |                   |
|                                                | 3 (3.6)   | 14 (1.1)   | 65 (1.1)    | 82 (1.1)      | 96 (0.2)      | <0.001            |
| <b>BMI before pregnancy</b>                    |           |            |             |               |               |                   |
| Underweight**                                  | 16 (19.0) | 155 (12.6) | 57 (9.6)    | 228 (10.3)    | 1841 (3.6)    | <0.001            |
| Obese***                                       | 109 (1.3) | 63 (5.1)   | 395 (6.6)   | 567 (6.3)     | 4347 (8.5)    |                   |
| Missing data                                   | 6 (7.1)   | 57 (4.6)   | 174 (2.9)   | 237 (3.2)     | 1074 (2.1)    |                   |
| <b>History of spontaneous abortion(s)</b>      |           |            |             |               |               |                   |
|                                                | 2 (2.4)   | 51 (4.1)   | 479 (8.0)   | 532 (7.3)     | 5984 (11.7)   | <0.001            |
| <b>Pre-existing hypertension</b>               |           |            |             |               |               |                   |
|                                                | 0 (0)     | 1 (0.1)    | 6 (0.1)     | 7 (0.1)       | 102 (0.2)     | 0.026             |
| <b>Pre-existing diabetes</b>                   |           |            |             |               |               |                   |
|                                                | 0 (0)     | 7 (0.6)    | 42 (0.7)    | 49 (0.7)      | 358 (0.7)     | 0.834             |

152 Data expressed as n (%).

153 \*P-values refer to differences between all the age groups.

154 \*\*BMI <18.5 kg/m<sup>2</sup>155 \*\*\*BMI ≥ 30.0 kg/m<sup>2</sup>

1  
2  
3 156 The area of residence at the time of delivery was divided into urban, densely populated or rural  
4  
5  
6 157 according to national classification by Statistics Finland.<sup>26</sup> Pre-pregnancy BMI was calculated on the  
7  
8 158 basis of height and weight measures reported by the pregnant women.  
9  
10

11  
12 159 Adequacy of prenatal care was calculated on the basis of the recommended number of antenatal  
13  
14 160 clinic visits in Finland (13-17 visits in full term pregnancies)<sup>27</sup> adjusted for gestational age at birth.  
15

16  
17 161 Inadequate prenatal care was defined as attendance at fewer than half of the recommended number  
18  
19 162 of visits.  
20  
21

## 22 23 163 **Statistical analysis**

24  
25  
26 164 To assess differences between age groups, the  $\chi^2$  test and Fisher's exact test were used as  
27  
28 appropriate. A P-value <0.05 was defined as statistically significant. The estimated risks (unadjusted  
29 165 and adjusted odds ratios [ORs] with their 95% confidence intervals [CIs]) of adverse outcomes were  
30  
31 166 calculated using binary logistic regression. Our basic multivariate model included all demographic  
32  
33  
34 167 factors presented in Table 1 (except for history of spontaneous abortions, which was used for preterm  
35  
36 168 birth only) and adequacy of prenatal care. Pregnancy complications were added to the model when  
37  
38  
39 169 found to be clinically relevant. Variables were removed from the model when necessary as a result of  
40  
41 170 small numbers of cases.  
42  
43  
44 171

45  
46  
47 172 A subgroup analysis was carried out including only teenagers, dividing the group into those with  
48  
49  
50 173 inadequate and adequate prenatal care (reference group). The risks were analysed using binary  
51  
52 174 logistic regression. We used the basic multivariate model (see above), excluding pre-existing  
53  
54  
55 175 hypertension and diabetes as a result of small numbers of cases.  
56  
57  
58  
59  
60

1  
2  
3 176 To minimise bias, we used list-wise deletion in logistic regression analysis when data was missing. The  
4  
5  
6 177 percentages of missing cases as regards demographic factors are shown in Table 1.  
7  
8  
9 178 IBM SPSS statistics 19.0 and 20.0 for Windows were used for the statistical analyses.  
10  
11

## 12 13 179 RESULTS

### 14 15 16 17 180 Demographics

18  
19  
20  
21 181 All the demographic characteristics of the teenagers vs. the reference women differed significantly,  
22  
23 182 except for pre-existing diabetes (Table 1). Pregnant teenagers were more likely to be single, live in a  
24  
25  
26 183 rural area, smoke and be diagnosed with misuse of alcohol or drugs during pregnancy. Pre-existing  
27  
28 184 hypertension was more common in the reference group.  
29  
30  
31  
32 185 All groups showed a good mean number of visits to an antenatal clinic (Table 2). However, teenagers  
33  
34 186 started their prenatal care significantly later in pregnancy. All teenage groups were also more likely to  
35  
36  
37 187 show a significantly lower attendance rate.  
38  
39

40 188 **Table 2: Prenatal care according to age group (years)**

|                                                     | 13–15      | 16–17      | 18–19      | All teenagers | 25–29      | P* for difference |
|-----------------------------------------------------|------------|------------|------------|---------------|------------|-------------------|
| <b>n</b>                                            | 84         | 1234       | 5987       | 7305          | 51 142     |                   |
| <b>All antenatal visits (Mean ± SD)</b>             | 14.6 ± 6.0 | 16.1 ± 5.8 | 16.5 ± 5.3 | 16.4 ± 5.4    | 16.5 ± 4.7 | <0.001            |
| <b>Hospital polyclinic visits (Mean ± SD)</b>       | 4.3 ± 2.3  | 3.7 ± 2.9  | 3.1 ± 2.7  | 3.2 ± 2.8     | 2.7 ± 2.5  | <0.001            |
| <b>First antenatal visit, gestational weeks</b>     | 18.8 ± 9.0 | 12.6 ± 7.2 | 10.2 ± 5.0 | 10.7 ± 5.6    | 9.0 ± 3.1  | <0.001            |
| <b>First antenatal visit ≥ 20 gestational weeks</b> | 43 (51.2)  | 192 (15.6) | 358 (6.0)  | 593 (8.1)     | 728 (1.4)  | <0.001            |
| <b>Low attendance (%)</b>                           |            |            |            |               |            |                   |
| <50% of expected visits                             | 4 (4.9)    | 65 (5.4)   | 141 (2.4)  | 210 (3.0)     | 691 (1.4)  | <0.001            |



|                                                     |           |            |             |             |              |        |
|-----------------------------------------------------|-----------|------------|-------------|-------------|--------------|--------|
| <b>1st trimester<br/>ultrasonographic screening</b> | 30 (35.7) | 671 (54.4) | 3733 (62.4) | 4434 (60.7) | 37429 (73.2) | <0.001 |
| <b>2nd trimester<br/>ultrasonographic screening</b> | 45 (53.6) | 850 (68.9) | 4299 (71.8) | 5194 (71.1) | 39620 (77.5) | <0.001 |

\* P-values refer to differences between all the age groups.

## Pregnancy complications

Significantly increased risks of anaemia, eclampsia, proteinuria, UTI and pyelonephritis were noted among the teenagers. The youngest group of teenagers (13—15-year-olds) had an elevated risk of pre-eclampsia and a small excess risk was also noted among 18—19-year-olds after controlling for confounding factors (Table 3). The frequency of gestational diabetes (5.3% [n=385] vs. 8.2% [n=4173], adjusted odds ratio [adj. OR] 0.7, 95% CI 0.6 to 0.7) and *placenta praevia* (0.04% [n=3] vs. 0.3% [n=161], adj. OR 0.1, 0.01 to 0.8) was lower among 13—19-year-olds although the differences between 13—15-year-olds and the reference group were non-significant, as was the case between 16—17-year-olds and the reference group as regards *placenta praevia*.

201 **Table 3: Maternal complications during pregnancy according to age group**

|                                     |                  | <b>Maternal age in years</b> |                   |                   |                      |              |
|-------------------------------------|------------------|------------------------------|-------------------|-------------------|----------------------|--------------|
|                                     |                  | <b>13–15</b>                 | <b>16–17</b>      | <b>18–19</b>      | <b>All teenagers</b> | <b>25–29</b> |
| <b>n</b>                            |                  | 84                           | 1234              | 5987              | 7305                 | 51 142       |
| <b>Anaemia</b> <sup>*M1</sup>       | n (%)            | 6 (7.1)                      | 64 (5.2)          | 245 (4.1)         | 315 (4.3)            | 1227 (2.4)   |
|                                     | OR (95% CI)      | 3.2 (1.4 to 7.3)             | 2.3 (1.7 to 2.9)  | 1.8 (1.5 to 2.0)  | 1.9 (1.7 to 2.1)     |              |
|                                     | Adj. OR (95% CI) | 3.1 (1.3 to 7.3)             | 2.2 (1.7 to 2.9)  | 1.8 (1.2 to 2.1)  | 1.8 (1.6 to 2.1)     | 1 (Ref.)     |
| <b>Pre-eclampsia</b> <sup>M2</sup>  | n (%)            | 6 (7.1)                      | 26 (2.1)          | 182 (3.0)         | 214 (2.9)            | 1522 (3.0)   |
|                                     | OR (95% CI)      | 2.5 (1.1 to 5.8)             | 0.7 (0.5 to 1.0)  | 1.0 (0.9 to 1.2)  | 1.0 (0.9 to 1.1)     |              |
|                                     | Adj. OR (95% CI) | 3.7 (1.5 to 9.0)             | 0.9 (0.6 to 1.4)  | 1.2 (1.0 to 1.5)  | 1.2 (1.0 to 1.4)     | 1 (Ref.)     |
| <b>Eclampsia</b> <sup>M4</sup>      | n (%)            | 0 (0.0)                      | 2 (0.2)           | 9 (0.2)           | 11 (0.2)             | 26 (0.1)     |
|                                     | OR (95% CI)      | -                            | 3.2 (0.8 to 13.5) | 3.9 (1.4 to 6.3)  | 3.0 (1.4 to 6.0)     |              |
|                                     | Adj. OR (95% CI) | -                            | 2.3 (0.3 to 18.2) | 3.3 (1.4 to 7.8)  | 3.2 (1.4 to 7.3)     | 1 (Ref.)     |
| <b>Proteinuria</b> <sup>M3</sup>    | n (%)            | 2 (2.4)                      | 9 (0.7)           | 32 (0.5)          | 43 (0.6)             | 171 (0.3)    |
|                                     | OR (95% CI)      | 7.3 (1.8 to 29.8)            | 2.2 (1.1 to 4.3)  | 1.6 (1.1 to 2.3)  | 1.8 (1.3 to 2.5)     |              |
|                                     | Adj. OR (95% CI) | 12.3 (2.8 to 53.6)           | 2.4 (1.1 to 5.2)  | 1.6 (1.0 to 2.5)  | 1.8 (1.2 to 2.6)     | 1 (Ref.)     |
| <b>UTI</b> <sup>M5</sup>            | n (%)            | 0 (0.0)                      | 6 (0.5)           | 21 (0.4)          | 27 (0.4)             | 75 (0.1)     |
|                                     | OR (95% CI)      | -                            | 3.3 (1.4 to 7.7)  | 2.4 (1.5 to 3.9)  | 2.5 (1.6 to 3.9)     |              |
|                                     | Adj. OR (95% CI) | -                            | 4.1 (1.7 to 10.2) | 2.7 (1.6 to 4.6)  | 2.9 (1.8 to 4.8)     | 1 (Ref.)     |
| <b>Pyelonephritis</b> <sup>M6</sup> | n (%)            | 0 (0.0)                      | 8 (0.6)           | 27 (0.5)          | 35 (0.5)             | 45 (0.1)     |
|                                     | OR (95% CI)      | -                            | 7.4 (3.5 to 15.8) | 5.1 (3.2 to 8.3)  | 5.5 (3.5 to 8.5)     |              |
|                                     | Adj. OR (95% CI) | -                            | 9.6 (4.2 to 21.9) | 5.8 (3.4 to 10.0) | 6.3 (3.8 to 10.4)    | 1 (Ref.)     |

\* Haemoglobin < 100 g/l.

**All the variables are adjusted according to multivariate models:**

**M1:** Demographic variables (Table 1 – history of spontaneous abortions) + adequacy of prenatal care

**M2:** M1 + (PIH and proteinuria)

**M3:** M1 + PIH

**M4:** M3 – misuse of alcohol or drugs and pre-existing hypertension

**M5:** M1 – misuse of alcohol or drugs

**M6:** M1 – pre-existing hypertension

1  
2  
3  
4 210 There were no statistically significant differences between the groups as regards PIH (3.2% [n=233] vs.  
5  
6  
7 211 4.2% [n=2158]), chorioamnionitis (0.6% [n=44] vs. 0.7% [n=377]), STIs (0.05% [n=10] vs. 0.02% [n=34]),  
8  
9 212 bleeding in early pregnancy (0.4% for both [n=27 vs. 190]), intrahepatic cholestasis of pregnancy  
10  
11  
12 213 (1.1% [n=79] vs. 0.9% [n=460]) or fear of childbirth (1.3% for both [n=98 vs. 659]).  
13  
14

15 214  
16  
17  
18  
19 215 Regarding pregnancy complications among teenagers, we evaluated their effects on other adverse  
20  
21 216 obstetric outcomes. Anaemia was a risk factor for very preterm birth (adjusted odds ratio 2.1, 1.1 to  
22  
23  
24 217 4.2). Proteinuria was found to be a risk factor for pre-eclampsia (5.4, 3.6 to 8.0), but not for eclampsia  
25  
26 218 or adverse neonatal outcomes. UTI and pyelonephritis did not affect the risks of adverse obstetric  
27  
28  
29 219 outcomes.  
30  
31

## 32 220 **Delivery outcomes**

33  
34  
35

36 221 The estimated risks (adj. OR) among all teenagers (13–19 years of age) compared with the reference  
37  
38  
39 222 women were: Caesarean section 0.6 (0.6 to 0.7), operative vaginal delivery 0.6 (0.6 to 0.7), anal  
40  
41 223 sphincter rupture 0.4 (0.3 to 0.5) and breech presentation 0.7 (0.6 to 0.8) (Figure 1). However, when  
42  
43  
44 224 analysed in subgroups according to age, the estimated risks among 13–15-year-olds did not differ  
45  
46 225 significantly from those in the reference group, except for Caesarean section.  
47  
48

49 226 The percentages of planned Caesarean sections were similar among 13–15-year-olds and the  
50  
51  
52 227 reference women (4.8 % [n=4] vs. 4.5% [n=2301]), but significantly lower among 16–17- and 18–19-  
53  
54  
55 228 year-olds (2.4 % [n=30] and 3.2% [n=192], respectively). Regarding urgent Caesarean sections, the  
56  
57 229 frequencies were lower among all teenagers (7.2% [n=524] vs. 11.7% [n=5996]) and descended  
58  
59  
60

1  
2  
3 230 according to age. In the case of emergency Caesarean sections, however, there were no significant  
4  
5  
6 231 differences (1.1% [n=83] vs. 1.5% [n=766]).  
7  
8

9 232 The frequencies of induction of labour and use of oxytocin during labour were similar in the teenagers  
10  
11 233 and reference women (16.8% [n=1226] vs. 17.2% [n=8788] and 49.7% [n=3630] vs. 50.3% [n=25744]  
12  
13  
14 234 respectively). Episiotomy was performed less often in all teenage groups (39.1% [n=2861] vs. 41.2%  
15  
16 [n=21511]), although the difference was non-significant as regards 13—15-year-olds. Combined  
17 235 regional anaesthesia was used significantly more often in all teenage groups compared with the  
18  
19 236 reference women (72.5% [n=5296] vs. 66.3% [n=33907]).  
20  
21  
22 237  
23  
24

25 238 The incidence of uterine curettage after childbirth was lower among all 13—19-year-olds (0.5% [n=40]  
26  
27 vs. 0.9% [n=446]), but the significance disappeared when the subgroups were analysed separately.  
28 239  
29  
30 240 Differences in the incidence of abnormal bleeding after childbirth were non-significant between 13—  
31  
32 241 15-year-olds (4.8% [n=4]) and the reference group (3.5% [n=1772]), but significantly lower among  
33  
34  
35 242 16—17- and 18—19-year-olds (1.8% [n=22] and 2.1% [n=125] respectively). No differences were seen  
36  
37  
38 243 as regards shoulder dystocia (0.2% for both [n=9 vs. 116], placental abruption (0.2% for both [n=19 vs.  
39  
40 244 13]), uterine rupture (none vs. 0.05% [n=24]), abnormal bleeding during delivery (0.2% for both [n=3  
41  
42 vs. 135]) and postpartum infection (0.5% [n=36] vs. 0.4% [n=229]).  
43 245  
44  
45

## 46 246 **Neonatal outcomes**

47  
48  
49

50 247 Table 4 summarises the incidences of various neonatal outcomes. No significant differences emerged  
51  
52 248 between the 13—19- and 25—29-year-olds as regards 5-min Apgar score of less than 7 (2.5% [n=161]  
53  
54 vs. 2.8% [n=1213]), cord blood pH below 7.05 at birth (1.9% [n=139] vs. 1.5% [n=767]), resuscitation of  
55 249  
56  
57  
58  
59  
60

1  
2  
3 250 the newborn (1.0% for both [n= 70 vs. 522]), use of a respirator (1.0% [n=74] vs. 0.9% [n=456]) or use  
4  
5  
6 251 of antibiotics (6.6% [n=481] vs. 6.8% [n=3498]).  
7  
8  
9  
10  
11  
12  
13  
14  
15  
16  
17  
18  
19  
20  
21  
22  
23  
24  
25  
26  
27  
28  
29  
30  
31  
32  
33  
34  
35  
36  
37  
38  
39  
40  
41  
42  
43  
44  
45  
46  
47  
48  
49  
50  
51  
52  
53  
54  
55  
56  
57  
58  
59  
60

For peer review only

252 **Table 4: Neonatal outcomes according to age group**

|                                                |                  | <b>Maternal age in years</b>   |                  |                  |                      |              |
|------------------------------------------------|------------------|--------------------------------|------------------|------------------|----------------------|--------------|
|                                                |                  | <b>13–15</b>                   | <b>16–17</b>     | <b>18–19</b>     | <b>All teenagers</b> | <b>25–29</b> |
| <b>n</b>                                       |                  | 84                             | 1234             | 5987             | 7305                 | 51 142       |
| <b>Extremely preterm &lt;28 w<sup>M3</sup></b> | n (%)            | 2 (2.4)                        | 3 (0.2)          | 23 (0.4)         | 28 (0.4)             | 149 (0.3)    |
|                                                | OR (95% CI)      | 8.5 (2.1 to 35.1)              | 0.8 (0.3 to 2.7) | 1.3 (0.9 to 2.1) | 1.3 (0.9 to 2.0)     |              |
|                                                | Adj. OR (95% CI) | 5.4 (0.7 to 41.5)              | 0.3 (0.0 to 2.4) | 1.1 (0.6 to 1.9) | 1.0 (0.6 to 1.7)     | 1 (Ref.)     |
| <b>Preterm &lt;37 w<sup>M2</sup></b>           | n (%)            | 11 (13.1)                      | 68 (5.5)         | 296 (4.9)        | 375 (5.1)            | 2440 (4.8)   |
|                                                | OR (95% CI)      | 3.0 (1.6 to 5.7)               | 1.1 (0.9 to 1.5) | 1.0 (0.9 to 1.2) | 1.1 (1.0 to 1.2)     |              |
|                                                | Adj. OR (95% CI) | 2.5 (1.2 to 5.3)               | 1.0 (0.8 to 1.4) | 0.9 (0.8 to 1.1) | 1.0 (0.8 to 1.1)     | 1 (Ref.)     |
| <b>SGA<sup>M1</sup></b>                        | n (%)            | 2 (2.4)                        | 52 (4.2)         | 199 (3.3)        | 253 (3.5)            | 1262 (2.5)   |
|                                                | OR (95% CI)      | 0.9 (0.2 to 3.5)               | 1.7 (1.3 to 2.3) | 1.4 (1.2 to 1.6) | 1.4 (1.2 to 1.6)     |              |
|                                                | Adj. OR (95% CI) | 0.5 (0.1 to 2.1)               | 1.2 (0.9 to 1.6) | 1.0 (0.8 to 1.1) | 1.0 (0.8 to 1.2)     | 1 (Ref.)     |
| <b>Intensive care<sup>M4</sup></b>             | n (%)            | 19 (22.6)                      | 138 (11.2)       | 654 (10.9)       | 811 (11.1)           | 5566 (10.9)  |
|                                                | OR (95% CI)      | 2.4 (1.4 to 4.0)               | 1.0 (0.9 to 1.2) | 1.0 (0.9 to 1.1) | 1.0 (0.9 to 1.1)     |              |
|                                                | Adj. OR (95% CI) | 1.9 (1.0 to 3.4)               | 0.9 (0.7 to 1.1) | 0.9 (0.8 to 1.0) | 0.9 (0.8 to 1.0)     | 1 (Ref.)     |
| <b>Stillbirth/neonatal death<sup>M5</sup></b>  | n (%)            | 2 (2.4)                        | 4 (0.3)          | 34 (0.6)         | 40 (0.5)             | 180 (0.4)    |
|                                                | OR (95% CI)      | 6.9 (1.7 to 28.3)              | 0.9 (0.3 to 2.5) | 1.6 (1.1 to 2.3) | 1.6 (1.1 to 2.2)     |              |
|                                                | Adj. OR (95% CI) | 0.4 (0.0 to 5.1) <sup>M6</sup> | 0.6 (0.1 to 2.7) | 1.4 (0.8 to 2.4) | 1.2 (0.7 to 2.1)     | 1 (Ref.)     |

253 **All the variables are adjusted according to multivariate models:**

254 **M1:** Demographic variables (Table 1 – history of spontaneous abortions) + adequacy of prenatal care, gestational diabetes, PIH, placental  
 255 abruption, chorioamnionitis, pre-eclampsia, eclampsia

256 **M2:** M1 + anaemia + history of spontaneous abortions

257 **M3:** M2 – misuse of alcohol or drugs

258 **M4:** M1 + preterm birth and IUGR

259 **M5:** M4 – (misuse of alcohol or drugs and pre-existing hypertension)

260 **M6:** M5 – (BMI and pre-existing diabetes)

261

262

## Adequacy of prenatal care

To investigate the effect of low antenatal clinic attendance on obstetric outcomes, we performed a subgroup analysis of 210 teenagers with inadequate prenatal care compared with 6 905 teenagers with adequate care. Teenagers with inadequate prenatal care were significantly more likely to be single (33.3% [n=67] vs. 22.1% [n=1526],  $P<0.001$ ) and to live in an urban area (73.9% [n=155] vs. 66.4% [n=485],  $P=0.03$ ). Although the rate of smoking during pregnancy did not differ statistically significantly in the two groups (43.9% [n=92] vs. 37.3% [n=2576],  $P=0.07$ ), teenagers with inadequate prenatal care were less likely to quit smoking during the 1<sup>st</sup> trimester (6.3% [n=13] vs. 12.8% [n=884],  $P=0.008$ ). No significant differences between the groups emerged as regards being underweight (11.4% [n=138] vs. 10.4% [n=718],  $P=0.62$ ) or obese (4.7% [n=10] vs. 6.3% [n=435],  $P=0.40$ ), or misuse of alcohol or drugs during pregnancy (0.5% [n=1] vs. 1.2% [n=81],  $P=0.73$ ).

Teenagers with inadequate prenatal care were at significantly higher risks of eclampsia and UTI, even after adjustment for confounding factors (Table 5). No excess risks of delivery complications were seen. The increased risk of stillbirth and neonatal mortality was almost entirely explained by premature births among teenagers with inadequate prenatal care.

1  
2  
3  
4  
5  
6  
7  
8  
9  
10  
11  
12  
13  
14  
15  
16  
17  
18  
19  
20  
21  
22  
23  
24  
25  
26  
27  
28  
29  
30  
31  
32  
33  
34  
35  
36  
37  
38  
39  
40  
41  
42  
43  
44  
45  
46  
47  
48  
49  
50  
51  
52  
53  
54  
55  
56  
57  
58  
59  
60

283 **Table 5: Maternal complications during pregnancy and neonatal outcomes**  
284 **according to adequacy of prenatal care.**

|                                                |                  | Inadequate prenatal care | Adequate prenatal care |
|------------------------------------------------|------------------|--------------------------|------------------------|
|                                                | n                | 210                      | 6905                   |
| <b>PREGNANCY COMPLICATIONS</b>                 |                  |                          |                        |
| <b>Eclampsia<sup>M4</sup></b>                  | n (%)            | 2 (1.0)                  | 7 (0.1)                |
|                                                | OR (95% CI)      | 9.5 (2.0 to 45.9)        |                        |
|                                                | Adj. OR (95% CI) | 12.6 (2.6 to 62.6)       | 1 (Ref.)               |
| <b>UTI<sup>M3</sup></b>                        | n (%)            | 3 (1.4)                  | 24 (0.3)               |
|                                                | OR (95% CI)      | 4.2 (1.2 to 13.9)        |                        |
|                                                | Adj. OR (95% CI) | 5.8 (1.7 to 19.7)        | 1 (Ref.)               |
| <b>NEONATAL OUTCOMES</b>                       |                  |                          |                        |
| <b>Extremely preterm &lt;28 w<sup>M6</sup></b> | n (%)            | 5 (2.4)                  | 20 (0.3)               |
|                                                | OR (95% CI)      | 8.4 (3.1 to 22.6)        |                        |
|                                                | Adj. OR (95% CI) | 0.7 (0.1 to 5.1)         | 1 (Ref.)               |
| <b>Preterm &lt;37 w<sup>M1</sup></b>           | n (%)            | 35 (16.7)                | 319 (4.6)              |
|                                                | OR (95% CI)      | 4.1 (2.8 to 6.0)         |                        |
|                                                | Adj. OR (95% CI) | 1.1 (0.7 to 1.7)         | 1 (Ref.)               |
| <b>Apgar at 5 min &lt;7<sup>M2</sup></b>       | n (%)            | 10 (5.8)                 | 140 (2.3)              |
|                                                | OR (95% CI)      | 2.7 (1.4 to 5.1)         |                        |
|                                                | Adj. OR (95% CI) | 1.9 (0.8 to 4.3)         | 1 (Ref.)               |
| <b>Intensive care<sup>M2</sup></b>             | n (%)            | 33 (15.7)                | 733 (10.6)             |
|                                                | OR (95% CI)      | 1.6 (1.1 to 2.3)         |                        |
|                                                | Adj. OR (95% CI) | 1.0 (0.6 to 1.7)         | 1 (Ref.)               |
| <b>Stillbirth/neonatal death<sup>M5</sup></b>  | n (%)            | 5 (2.4)                  | 28 (0.4)               |
|                                                | OR (95% CI)      | 6.0 (2.3 to 15.7)        |                        |
|                                                | Adj. OR (95% CI) | 0.7 (0.1 to 7.1)         | 1 (Ref.)               |

**All the variables are adjusted according to multivariate models:**

**M1:** Demographic variables (Table 1 – pre-existing hypertension and diabetes)

**M2:** M1 + preterm birth – history of spontaneous abortions

**M3:** M1 – misuse of alcohol or drugs – history of spontaneous abortions

**M4:** M1 – misuse of alcohol or drugs, BMI and history of spontaneous abortions

**M5:** M2 – misuse of alcohol or drugs

Missing data as regards confounding variables in inadequate vs. adequate prenatal care group: cohabitation 17.1% vs. 9.7%, smoking 10.0% vs. 2.2%, BMI 19.5% vs. 2.1%.



1  
2  
3 294 **DISCUSSION**  
4  
5  
6

7 295 Our comprehensive population-based study indicated an increased risk of eclampsia, proteinuria,  
8  
9 296 UTI, pyelonephritis and anaemia among pregnant teenagers. The youngest teenagers were also  
10  
11 297 faced with a higher risk of pre-eclampsia. However, teenagers were more likely to deliver vaginally  
12  
13 298 without delivery complications when compared with the reference women. Regarding neonatal  
14  
15 299 outcomes, the risk of preterm birth was increased among the youngest teenagers, whereas older  
16  
17 300 teenagers were at risk of having SGA infants. Inadequate prenatal care among teenagers increased  
18  
19 301 the risks of eclampsia, UTI and several adverse neonatal outcomes. Confounding factors affected  
20  
21 302 the risks of most neonatal outcomes, but their roles concerning maternal complications were less  
22  
23 303 significant.  
24  
25  
26  
27  
28  
29

30  
31  
32 304

33 305 The registers used for our study are of high quality and have been shown to be in accordance with  
34  
35 306 delivery records.<sup>23</sup> We were able to investigate a number of factors that have been sparsely  
36  
37 307 reported in connection with teenage pregnancies, such as proteinuria, UTI and pyelonephritis  
38  
39 308 during pregnancy, fear of childbirth and pain relief during delivery. Our study was nationwide,  
40  
41 309 giving a complete and realistic reflection of the situation regarding obstetric challenges among all  
42  
43 310 teenage pregnancies during the study period.  
44  
45  
46

47 311 In Finland, antenatal care, including routine visits to general practitioners and nurses/midwives, is  
48  
49 312 provided free of charge by municipalities and used by virtually all pregnant women.<sup>28</sup> Specialised  
50  
51 313 maternity units in public hospitals take care of practically all obstetric patients and births. In  
52  
53 314 addition, fetal screening including early ultrasonography with a nuchal translucency scan, blood  
54  
55 315 tests and structural ultrasonography is offered to all pregnant women.<sup>29</sup> Thus, the opportunity to  
56  
57  
58  
59  
60

1  
2  
3 316 receive comprehensive prenatal care is available to all regardless of socioeconomic status or  
4  
5 317 residence. This minimises the confounding effects which often complicate studies of this kind. We  
6  
7 318 also divided teenagers into categories by age. Although evidence suggests that the risks of  
8  
9 319 neonatal problems are higher in younger, biologically immature adolescents,<sup>16-18</sup> the majority of  
10  
11 320 studies, especially those on maternal outcomes, have involved the use of a dichotomised study  
12  
13 321 setting, neglecting the different stages of biological and psychological maturation in adolescents.<sup>10</sup>  
14  
15 322 <sup>12 19 30-35</sup> The importance of choosing the right reference group cannot be underestimated. The age  
16  
17 323 of 20—24 years has often been used for reference, but age groups of even 20—39 years are seen.  
18  
19 324 Childbearing has commonly been postponed in recent decades, in parallel with women's  
20  
21 325 increasing level of education. The mean age of primigravid women in Finland was approximately  
22  
23 326 28 years during the study period; thus we chose primigravid women of 25—29 years of age as a  
24  
25 327 reference group.  
26  
27  
28  
29  
30  
31  
32 328 Our study is retrospective, which remains a limitation. The reliability of the data depends on the  
33  
34 329 accuracy of reporting. In addition, the database did not allow for identification of precise timing of  
35  
36 330 the different events during pregnancy. There was more missing data regarding confounding  
37  
38 331 effects in the teenage group, as in the subgroup of teenagers with inadequate prenatal care. We  
39  
40 332 could not look at the socioeconomic or educational status of adolescents in this study. The MBR  
41  
42 333 includes information on maternal occupation, which is, however, less relevant as regards  
43  
44 334 teenagers and young adults. Unfortunately, there is no information on fathers in the MBR as a  
45  
46 335 result of confidentiality rules. Had socioeconomic status been available for use in our multivariate  
47  
48 336 models, this might have affected risks of adverse obstetric outcomes among teenagers. We were  
49  
50 337 not able to obtain information on weight gain during pregnancy. Poor weight gain is a known risk  
51  
52 338 factor of adverse neonatal outcomes, such as low birth weight. Our study group of 13—15-year-  
53  
54 339 olds was small in number, thus leading to lack of power in detecting risks of rare outcomes.  
55  
56  
57  
58  
59  
60

1  
2  
3 340 However, in order to discover the effect of very young age on the risk of adverse obstetric  
4  
5 341 outcomes, this age group was analysed separately.  
6  
7

### 8 342 **Relevant results in relation to those of other studies**

9  
10  
11 343 Overall, there was a high rate of attendance at antenatal clinics, which was expected, as antenatal  
12  
13 344 care is offered free of charge to all pregnant mothers. It can be speculated that women not  
14  
15 345 reached by the antenatal care system may be socially disadvantaged in various areas of life. Poor  
16  
17 346 socioeconomic status is often known to precede teenage pregnancy.<sup>36 37</sup> This view is supported by  
18  
19 347 our finding that teenagers smoked and were diagnosed with misuse of alcohol or drugs  
20  
21 348 significantly more often than reference women. Similar findings come from many parts of the  
22  
23 349 developed world,<sup>9 11 19 38 39</sup> whereas early marriage and childbirth are more common in other,  
24  
25 350 often developing parts of the world, thus leading to different social circumstances and possibly  
26  
27 351 different pregnancy outcomes.  
28  
29  
30  
31  
32

33  
34 352 The increased risk of anaemia seen among teenagers is in accordance with findings from several  
35  
36 353 earlier studies.<sup>10-12 32</sup> Physical growth and menstruation results in an increase in iron requirements  
37  
38 354 that is often not met by nutrition. This leads to a negative iron balance and makes teenagers more  
39  
40 355 susceptible to anaemia during pregnancy.<sup>40</sup> Poor fetal outcomes may occur, especially in cases of  
41  
42 356 severe or first trimester anaemia.<sup>40 41</sup> In our study, anaemia was a risk factor of very preterm  
43  
44 357 birth.  
45  
46  
47

48  
49 358 Previous studies carried out in industrialised countries have revealed no excess risks of pre-  
50  
51 359 eclampsia or PIH among adolescents,<sup>9-12 19</sup> whereas higher risks have been reported in developing  
52  
53 360 countries.<sup>14 15 34</sup> Our results are partly contradictory, indicating an increased risk of pre-eclampsia  
54  
55 361 among the youngest teenagers. The relatively small number of pregnant mothers aged 13—15  
56  
57  
58  
59  
60

1  
2  
3 362 years in our study places some uncertainty on this finding. A large Latin-American cross-sectional  
4  
5 363 study revealed an increasing rate of pre-eclampsia with descending age, but there was no  
6  
7  
8 364 significant difference in risk after adjustment for confounding factors.<sup>17</sup> A French study revealed a  
9  
10 365 lower risk among teenagers, but the number of very young teenagers was even smaller than in the  
11  
12 366 present study.<sup>11</sup>

13  
14  
15 367 Our results confirm findings in earlier studies, showing an elevated risk of eclampsia among  
16  
17 368 pregnant teenagers.<sup>42 43</sup> A report by the National Center for Health Statistics in the US showed an  
18  
19  
20 369 increasing trend in frequency with descending age (0.6% in 10–14-year-olds and 0.3% among  
21  
22 370 25–29-year-olds).<sup>44</sup> Because of a smaller number of cases and rarity of the condition, we could  
23  
24  
25 371 not evaluate such a trend. The essential role of prenatal care in the prevention of eclampsia has  
26  
27 372 been previously emphasised,<sup>45</sup> although not in studies confined to teenagers. We found a marked  
28  
29  
30 373 12-fold risk of eclampsia among teenagers with inadequate versus adequate care, highlighting the  
31  
32 374 importance of adequate prenatal care in teenage pregnancies.

33  
34  
35 375 We found an increasing risk of proteinuria in pregnancy with descending age. An earlier study on  
36  
37 376 the risk factors of proteinuria during pregnancy revealed a 1.5-fold risk among women below the  
38  
39  
40 377 age of 20.<sup>46</sup> Although the outcome of isolated proteinuria is mostly favourable, it is sometimes  
41  
42 378 known to precede pre-eclampsia and even eclampsia<sup>47 48</sup> and has been associated with preterm  
43  
44  
45 379 birth.<sup>49</sup> Whether or not isolated proteinuria is part of the same disease spectrum as pre-eclampsia  
46  
47 380 is controversial.<sup>46 50</sup> In our study, proteinuria was found to be a risk factor for pre-eclampsia, but  
48  
49  
50 381 not eclampsia or adverse neonatal outcomes.

51  
52  
53 382 Earlier studies on UTI and pyelonephritis in pregnant teenagers are sparse. Two UK studies  
54  
55 383 reported 1.5- to 1.6-fold risks of UTI<sup>10</sup> and pyelonephritis<sup>9</sup> among all teenagers. In contrast, no  
56  
57 384 excess risk was found in a Latin American study in which teenagers were analysed in subgroups by  
58  
59  
60

1  
2  
3 385 age.<sup>17</sup> Our findings suggest higher risks of both UTI and pyelonephritis, with a trend toward a  
4  
5 386 higher incidence with descending age. However, no cases were found among teenagers of 13–15  
6  
7 387 years of age, possibly because of the relative rarity of these diagnoses. Only a hypothesis for the  
8  
9 388 reason behind the increased risks has been presented – reduced resistance to infections in  
10  
11 389 pregnant teenagers.<sup>10</sup> We speculate that teenagers might be sexually more active during  
12  
13 390 pregnancy compared with older women, placing them at a higher risk of UTI. In addition, poorer  
14  
15 391 recognition of symptoms of UTI could lead to delayed care and explain the increased risk of  
16  
17 392 pyelonephritis.  
18  
19  
20  
21  
22 393 UTIs, and pyelonephritis in particular, have been associated with higher risks of adverse neonatal  
23  
24 394 outcomes,<sup>51 52</sup> although they are preventable with early detection and antimicrobial care.<sup>53</sup>  
25  
26  
27  
28 395 Regarding other infections, our results do not support earlier findings of a higher risk of  
29  
30 396 chorioamnionitis among adolescents compared with adult women.<sup>10 12</sup>  
31  
32  
33  
34 397 We detected lower or similar risks of delivery complications and a higher incidence of vaginal  
35  
36 398 deliveries among teenagers, which is in line with findings in most studies in the developed world.<sup>9-</sup>  
37  
38 399 <sup>12 19</sup> Contradictory findings derive mainly from studies in developing countries.<sup>17 35</sup> The use of pain  
39  
40 400 relief, especially combined anaesthetic analgesia, was high in all groups and was used even more  
41  
42 401 often in teenagers compared with older women. This is in contrast to the results of a UK study.<sup>9</sup>  
43  
44  
45  
46 402 Three large retrospective cohort studies carried out in the US and Latin America revealed 1.2- to  
47  
48 403 2.0-fold risks of preterm birth and 1.1- to 1.5-fold risks of SGA infants among teenagers, with an  
49  
50 404 increasing trend with descending age.<sup>16-18</sup> Elevated (1.5-fold) risks of stillbirth and/or neonatal  
51  
52 405 death were found among the youngest teenagers. However, among older teenagers and after  
53  
54 406 adjustment for gestational age, the risks were either lower or non-significant.<sup>16-18</sup> These findings  
55  
56 407 were largely confirmed in our study, although some differences were seen, possibly as a result of a  
57  
58  
59  
60

1  
2  
3 408 smaller study population and the lack of socioeconomic status as a confounding factor. In addition,  
4  
5 409 we found an excess risk of preterm birth only among the youngest teenagers. The lack of risk  
6  
7 410 among older teenagers might be explained by the overall high quality and quantity of prenatal  
8  
9 411 care in Finland.

12  
13 412 In accordance with the results of several recent studies,<sup>20 21 54</sup> we found higher risks of adverse  
14  
15 413 neonatal outcomes, including an excess risk of neonatal/infant mortality among teenagers with  
16  
17 414 inadequate prenatal care.

### 21 415 **Unanswered questions and implications**

24 416 Our results add to existing literature, showing higher risks of various maternal complications  
25  
26 417 among teenagers, often displaying an increasing trend with descending age. An increased risk of  
27  
28 418 proteinuria during pregnancy was found, an outcome not analysed in past studies dealing with  
29  
30 419 teenage pregnancy. Confirmation of this finding and its possible influence on other, more serious  
31  
32 420 obstetric outcomes is required. The effect of prenatal care on maternal outcomes should also be  
33  
34 421 further analysed in the future. Clinical studies on the mode of delivery and its complications would  
35  
36 422 shed more light on whether or not adolescents have better myometrial function compared with  
37  
38 423 older women or whether the higher incidence of uncomplicated vaginal births is a consequence of  
39  
40 424 other factors, such as more attentive care of adolescents. In addition to immediate obstetric risks,  
41  
42 425 studies on long-term consequences indicate a higher incidence of morbidity and preterm mortality  
43  
44 426 among both teenage mothers and their children,<sup>1 2 4</sup> and these risks should be examined in  
45  
46 427 greater detail in the future.

52  
53  
54 428

1  
2  
3 429 The present study has practical implications: in addition to prevention and treatment of anaemia  
4  
5 430 and eclampsia, screening and counselling in connection with proteinuria, cystitis and  
6  
7 431 pyelonephritis are important among pregnant adolescents. The higher risk of pre-eclampsia  
8  
9 432 among the youngest teenagers should also be kept in mind. Teenagers in a welfare society are not  
10  
11 433 a risk group as regards delivery complications, and neonatal outcomes are mainly good. However,  
12  
13 434 the younger the expectant mother, the greater are the risks of several maternal and neonatal  
14  
15 435 complications. Adequacy of prenatal care is of great importance in preventing serious adverse  
16  
17 436 obstetric outcomes. Thus, extra efforts should be made to reach all pregnant teenagers and enrol  
18  
19 437 them in adequate maternity care in early pregnancy.  
20  
21  
22  
23  
24  
25  
26  
27  
28  
29  
30  
31  
32  
33  
34  
35  
36  
37  
38  
39

438

439

440

441

## 442 FOOTNOTES

443 **Contributors:** OH, MG and SL had the initial research idea and all authors contributed to the  
444 design, interpretation and critical revision of data. All authors had full access to the data and take  
445 responsibility of the integrity of the data and accuracy of the data analysis. SL carried out the  
446 analysis and wrote the drafts of the paper with important intellectual input from all coauthors. All  
447 authors have approved the final version of the manuscript submitted for publication. OH and SL  
448 act as guarantors.

1  
2  
3 449 **Funding statement:** Financial support from Helsinki University Central Hospital Research Funds  
4  
5 450 and Clinical Graduate School in Pediatrics/Gynecology, University of Helsinki, Finland are gratefully  
6  
7 451 acknowledged.

9  
10 452 **Competing interests:** All authors have completed the ICMJE uniform disclosure form at  
11  
12 453 [www.icmje.org/coi\\_disclosure.pdf](http://www.icmje.org/coi_disclosure.pdf) and declare: no support from any organisation for the  
13  
14 454 submitted work; no financial relationships with any organisations that might have an interest in  
15  
16 455 the submitted work in the previous three years; no other relationships or activities that could  
17  
18 456 appear to have influenced the submitted work.

19  
20 457 **Ethical approval:** No ethical approval was required for the present study. The organization  
21  
22 458 responsible for the registers (THL National Institute for Health and Welfare) has given approval for  
23  
24 459 the study (Dnro THL/1008/5.05.00/2012).

25  
26 460 **Data sharing:** No additional data available. Researchers can apply for the authorisation for the use  
27  
28 461 of same health register data for scientific research from the register keeping organization (THL  
29  
30 462 National Institute for Health and Welfare).

## 31 463 **FIGURE LEGENDS**

32  
33 464  
34  
35 465 Figure 1: Frequencies (%) of operative delivery and other delivery outcomes according to age  
36  
37 466 group.



467 **REFERENCES**

- 468 1. Paranjothy S, Broughton H, Adappa R, Fone D. Teenage pregnancy: who suffers? *Arch Dis Child*.  
469 2009;94:239-45.
- 470 2. E-Risk Study T. Teen-aged mothers in contemporary Britain. *J Child Psychol Psychiatry*.  
471 2002;43:727-42.
- 472 3. Olausson PO, Haglund B, Weitoft GR, Cnattingius S. Teenage childbearing and long-term  
473 socioeconomic consequences: a case study in Sweden. *Fam Plann Perspect*. 2001;33:70-4.
- 474 4. Otterblad Olausson P, Haglund B, Ringback Weitoft G, Cnattingius S. Premature death among  
475 teenage mothers. *BJOG*. 2004;111:793-9.
- 476 5. Olausson PO, Cnattingius S, Haglund B. Teenage pregnancies and risk of late fetal death and  
477 infant mortality. *Br J Obstet Gynaecol*. 1999;106:116-21.
- 478 6. Perinatal statistics in the Nordic countries. Statistical Report 7/2012. [updated 2012 March 27;  
479 cited 2013 Apr 10]. Official Statistics of Finland, Health 2012. THL. Available from:  
480 [http://www.thl.fi/en\\_US/web/en/statistics/topics/reproductive\\_health/deliveries](http://www.thl.fi/en_US/web/en/statistics/topics/reproductive_health/deliveries).
- 481 7. Birth summary tables, England and Wales - 2010. [cited 2013 Aug 10]. Available from:  
482 <http://www.statistics.gov.uk/hub/population/births-and-fertility/live-births-and-stillbirths>.
- 483 8. Hamilton BE, Ventura SJ. Birth rates for U.S. teenagers reach historic lows for all age and ethnic  
484 groups. NCHS data brief, no 89. Hyattsville, MD: National Center for Health Statistics. 2012.
- 485 9. Gupta N, Kiran U, Bhal K. Teenage pregnancies: obstetric characteristics and outcome. *Eur J*  
486 *Obstet Gynecol Reprod Biol*. 2008;137:165-71.
- 487 10. Jolly MC, Sebire N, Harris J, Robinson S, Regan L. Obstetric risks of pregnancy in women less  
488 than 18 years old. *Obstet Gynecol*. 2000;96:962-6.
- 489 11. de Vienne CM, Creveuil C, Dreyfus M. Does young maternal age increase the risk of adverse  
490 obstetric, fetal and neonatal outcomes: a cohort study. *Eur J Obstet Gynecol Reprod Biol*.  
491 2009;147:151-6.
- 492 12. Raatikainen K, Heiskanen N, Verkasalo PK, Heinonen S. Good outcome of teenage pregnancies  
493 in high-quality maternity care. *Eur J Public Health*. 2006;16:157-61.
- 494 13. Menacker F, Martin JA, MacDorman MF, Ventura SJ. Births to 10-14 year-old mothers, 1990-  
495 2002: trends and health outcomes. *Natl Vital Stat Rep* .2004;53:1-18.
- 496 14. Rasheed S, Abdelmonem A, Amin M. Adolescent pregnancy in Upper Egypt. *Int J Gynaecol*  
497 *Obstet*. 2011;112:21-4.

- 1  
2  
3 498 15. Usta IM, Zoorob D, Abu-Musa A, Naassan G, Nassar AH. Obstetric outcome of teenage  
4 499 pregnancies compared with adult pregnancies. *Acta Obstet Gynecol Scand.* 2008;87:178-83.  
5  
6  
7 500 16. Chen XK, Wen SW, Fleming N, Demissie K, Rhoads GG, Walker M. Teenage pregnancy and  
8 501 adverse birth outcomes: a large population based retrospective cohort study. *Int J Epidemiol.*  
9 502 2007;36:368-73.  
10  
11 503 17. Conde-Agudelo A, Belizan JM, Lammers C. Maternal-perinatal morbidity and mortality  
12 504 associated with adolescent pregnancy in Latin America: Cross-sectional study. *Am J Obstet Gynecol*  
13 505 2005;192:342-9.  
14  
15  
16 506 18. Malabarey OT, Balayla J, Klam SL, Shrim A, Abenhaim HA. Pregnancies in young adolescent  
17 507 mothers: a population-based study on 37 million births. *J Pediatr Adolesc Gynecol.* 2012;25:98-  
18 508 102.  
19  
20  
21 509 19. Fleming N, Ng N, Osborne C, Biederman S, Yasseen AS 3rd, Dy J, Rennicks White R, Walker M.  
22 510 Adolescent pregnancy outcomes in the province of ontario: a cohort study. *J Obstet Gynaecol*  
23 511 *Can.* 2013 Mar;35(3):234-45.20. Vieira CL, Coeli CM, Pinheiro RS, Brandao ER, Camargo KR Jr,  
24 512 Aguiar FP. Modifying effect of prenatal care on the association between young maternal age and  
25 513 adverse birth outcomes. *J Pediatr Adolesc Gynecol.* 2012;25:185-9.  
26  
27  
28 514 21. Debiec KE, Paul KJ, Mitchell CM, Hitti JE. Inadequate prenatal care and risk of preterm delivery  
29 515 among adolescents: a retrospective study over 10 years. *Am J Obstet Gynecol.* 2010;203:122.e1-6.  
30  
31 516 22. Congenital anomalies 1993–2010. Statistical report 1/2013. [updated 2013 January 15; cited  
32 517 2013 June 24]. Official Statistics of Finland, Congenital Malformations. THL. Available from:  
33 518 [http://www.thl.fi/en\\_US/web/en/statistics/topics/reproductive\\_health/congenital\\_anomalies](http://www.thl.fi/en_US/web/en/statistics/topics/reproductive_health/congenital_anomalies).  
34  
35  
36 519 23. Gissler M, Haukka J. Finnish health and social welfare registers in epidemiological research.  
37 520 *Norsk Epidemiologi.* 2004;14:113-20.  
38  
39 521 24. Gissler M, Teperi J, Hemminki E, Meriläinen J. Data quality after restructuring a nationwide  
40 522 medical birth registry. *Scand J Soc Med.* 1995;23:75-80.  
41  
42  
43 523 25. Pihkala J, Hakala T, Voutilainen P, Raivio K. [Characteristics of recent fetal growth curves in  
44 524 Finland]. *Duodecim.* 1989;105:1540-6. Finnish.  
45  
46 525 26. Statistic Finland. 2012. Tilastokeskus - Statistikcentralen - Statistics Finland. [updated 2012  
47 526 March 27; cited 2013 Aug 10]. Available from: [www.tilastokeskus.fi/index\\_en.html](http://www.tilastokeskus.fi/index_en.html).  
48  
49  
50 527 27. Viisainen K. [Screening and collaboration in Maternity care. Guidelines 1999.]. Jyväskylä:  
51 528 STAKES Oppaita 34; 1999. Finnish.  
52  
53 529 28. Perinatal statistics: parturients, deliveries and newborns 2011. Statistical Report 20/2012.  
54 530 [updated 2012 Dec 12; cited 2013 Apr 10]. Official Statistics of Finland, Health 2012. THL. Available  
55 531 from: [http://www.thl.fi/en\\_US/web/en/statistics/topics/reproductive\\_health/deliveries](http://www.thl.fi/en_US/web/en/statistics/topics/reproductive_health/deliveries).  
56  
57  
58  
59  
60

- 1  
2  
3 532 29. FINLEX. 2006. Government Degree on Screenings act 1339/2006. [cited 2013 Aug 10]. Available  
4 533 from: <http://www.finlex.fi/en/>.
- 5  
6 534 30. Bradford JA, Giles WB. Teenage pregnancy in western Sydney. *Aust N Z J Obstet Gynaecol*.  
7 535 1989;29:1-4.
- 8  
9  
10 536 31. Abu-Heija A, Ali AM, Al-Dakheil S. Obstetrics and perinatal outcome of adolescent nulliparous  
11 537 pregnant women. *Gynecol Obstet Invest*. 2002;53:90-2.
- 12  
13 538 32. Briggs MM, Hopman WM, Jamieson MA. Comparing pregnancy in adolescents and adults:  
14 539 obstetric outcomes and prevalence of anemia. *J Obstet Gynaecol Can*. 2007;29:546-55.
- 15  
16  
17 540 33. Brown HL, Fan YD, Gonsoulin WJ. Obstetric complications in young teenagers. *South Med J*.  
18 541 1991;84:46-8.
- 19  
20 542 34. Mahavarkar SH, Madhu CK, Mule VD. A comparative study of teenage pregnancy. *J Obstet*  
21 543 *Gynaecol*. 2008;28:604-7.
- 22  
23 544 35. Sagili H, Pramya N, Prabhu K, Mascarenhas M, Reddi Rani P. Are teenage pregnancies at high  
24 545 risk? A comparison study in a developing country. *Arch Gynecol Obstet*. 2012;285:573-7.
- 25  
26  
27 546 36. Imamura M, Tucker J, Hannaford P, da Silva MO, Astin M, Wyness L, et al. Factors associated  
28 547 with teenage pregnancy in the European Union countries: a systematic review. *Eur J Public Health*.  
29 548 2007;17:630-6.
- 30  
31  
32 549 37. Vikat A, Rimpela A, Kosunen E, Rimpela M. Sociodemographic differences in the occurrence of  
33 550 teenage pregnancies in Finland in 1987-1998: a follow up study. *J Epidemiol Community Health*.  
34 551 2002;56:659-68.
- 35  
36  
37 552 38. Cavazos-Rehg PA, Krauss MJ, Spitznagel EL, Schootman M, Cottler LB, Bierut LJ. Brief report:  
38 553 Pregnant by age 15 years and substance use initiation among US adolescent girls. *J Adolesc*.  
39 554 2012;35:1393-7.
- 40  
41  
42 555 39. Hansen BT, Kjaer SK, Munk C, Tryggvadottir L, Sparen P, Hagerup-Jenssen M, et al. Early  
43 556 smoking initiation, sexual behavior and reproductive health - a large population-based study of  
44 557 Nordic women. *Prev Med*. 2010;51:68-72.
- 45  
46 558 40. Beard JL. Iron requirements in adolescent females. *J Nutr*. 2000;130(2S Suppl):440S-2S.
- 47  
48  
49 559 41. Scanlon KS, Yip R, Schieve LA, Cogswell ME. High and low hemoglobin levels during pregnancy:  
50 560 differential risks for preterm birth and small for gestational age. *Obstet Gynecol*. 2000;96:741-8.
- 51  
52 561 42. Morikawa M, Cho K, Yamada T, Yamada T, Sato S, Minakami H. Risk factors for eclampsia in  
53 562 Japan between 2005 and 2009. *Int J Gynaecol Obstet*. 2012;117:66-8.
- 54  
55 563 43. Tebeu PM, Halle G, Lemogoum D, Simo Wambo AG, Kengne Fosso G, Fomulu JN. Risk factors  
56 564 for eclampsia among patients with pregnancy-related hypertension at Maroua Regional Hospital,  
57 565 Cameroon. *Int J Gynaecol Obstet*. 2012;118:254-6.
- 58  
59  
60

- 1  
2  
3 566 44. Menacker F, Martin JA, MacDorman MF, Ventura SJ. Births to 10-14 year-old mothers, 1990-  
4 567 2002: trends and health outcomes. *Natl Vital Stat Rep.* 2004;53:1-18.  
5  
6 568 45. Ansari MZ, Mueller BA, Krohn MA. Epidemiology of eclampsia. *Eur J Epidemiol.* 1995;11:447-  
7 569 51.  
8  
9  
10 570 46. Macdonald-Wallis C, Lawlor DA, Heron J, Fraser A, Nelson SM, Tilling K. Relationships of risk  
11 571 factors for pre-eclampsia with patterns of occurrence of isolated gestational proteinuria during  
12 572 normal term pregnancy. *PLoS ONE.* 2011;6:e22115.  
13  
14 573 47. Knight M, Ukoss. Eclampsia in the United Kingdom 2005. *BJOG.* 2007;114:1072-8.  
15  
16  
17 574 48. Morikawa M, Yamada T, Minakami H. Outcome of pregnancy in patients with isolated  
18 575 proteinuria. *Curr Opin Obstet Gynecol.* 2009;21:491-5.  
19  
20 576 49. Franceschini N, Savitz DA, Kaufman JS, Thorp JM. Maternal urine albumin excretion and  
21 577 pregnancy outcome. *Am J Kidney Dis.* 2005;45:1010-8.  
22  
23  
24 578 50. Masuyama H, Suwaki N, Nakatsukasa H, Masumoto A, Tateishi Y, Hiramatsu Y. Circulating  
25 579 angiogenic factors in preeclampsia, gestational proteinuria, and preeclampsia superimposed on  
26 580 chronic glomerulonephritis. *Am J Obstet Gynecol.* 2006;194:551-6.  
27  
28 581 51. Mittal P, Wing DA. Urinary tract infections in pregnancy. *Clin Perinatol* 2005;32:749-64.  
29  
30  
31 582 52. Farkash E, Weintraub AY, Sergienko R, Wiznitzer A, Zlotnik A, Sheiner E. Acute antepartum  
32 583 pyelonephritis in pregnancy: a critical analysis of risk factors and outcomes. *Eur J Obstet Gynecol*  
33 584 *Reprod Biol.* 2012;162:24-7.  
34  
35 585 53. Romero R, Oyarzun E, Mazor M, Sirtori M, Hobbins JC, Bracken M. Meta-analysis of the  
36 586 relationship between asymptomatic bacteriuria and preterm delivery/low birth weight. *Obstet*  
37 587 *Gynecol.* 1989;73:576-82.  
38  
39  
40 588 54. Partridge S, Balayla J, Holcroft CA, Abenhaim HA. Inadequate prenatal care utilization and risks  
41 589 of infant mortality and poor birth outcome: a retrospective analysis of 28,729,765 U.S. deliveries  
42 590 over 8 years. *Am J Perinatol.* 2012;29:787-93.  
43 591  
44 592  
45 593  
46 594  
47 595  
48 596  
49  
50  
51  
52  
53  
54  
55  
56  
57  
58  
59  
60

1  
2  
3  
4  
5  
6  
7  
8  
9 1  
10  
11  
12 2 **TITLE PAGE**  
13  
14  
15

16 3 **Is teenage pregnancy an obstetric risk in a welfare society? A population-based study**  
17  
18 4 **in Finland, from 2006 to 2011.**  
19  
20  
21 5

22  
23 6 Suvi Leppälahti, Mika Gissler, Maarit Mentula, Oskari Heikinheimo  
24  
25  
26 7

27  
28 8 Department of Obstetrics and Gynecology/Kätilöopisto Hospital, *University of Helsinki and Helsinki*  
29  
30 9 *University Central Hospital*, P.O. Box 610, 00029-HUS, Helsinki, Finland. Suvi Leppälahti, specialising  
31  
32 10 physician, Maarit Mentula, consultant gynaecologist, Oskari Heikinheimo, chief physician  
33  
34

35 11 Mika Gissler, THL National Institute for Health and Welfare, P.O. BOX 30, 00271 Helsinki, Finland.  
36

37 12 Mika Gissler, research professor  
38

39  
40 13 Correspondence to: Oskari Heikinheimo: [oskari.heikinheimo@helsinki.fi](mailto:oskari.heikinheimo@helsinki.fi)  
41

42 14 Keywords: Pregnancy, adolescence, complications, prenatal care  
43  
44

45 15 Word count: 39944335  
46

47  
48 16 Number of tables: 5  
49

50 17 Number of figures: 1  
51  
52  
53  
54  
55  
56  
57  
58  
59  
60

## ABSTRACT

**Objective:** To assess obstetric outcomes in teenage pregnancies in a country with a low teenage delivery rate and comprehensive high-quality prenatal care.

**Design:** Retrospective population-based register study.

**Setting:** Finland.

**Participants:** All nulliparous teenagers (13–15 years [n=84], 16–17 years [n=1234], 18–19 years [n=5987]) and controls (25–29-year-old women [n=51 142]) with singleton deliveries in 2006–2011.

**Main outcome measures:** Risk of adverse obstetric outcomes adjusted for demographic factors and clinically relevant pregnancy complications, with a main focus on maternal pregnancy complications.

**Results:** Teenage mothers were more likely than controls to live in rural areas (16.0% [n=1168] vs. 11.8% [n=6035]), smoke (36.4% [n=2661] vs. 7.0% [n=3580]) and misuse alcohol or drugs (1.1% [n=82] vs. 0.2% [n=96]) ( $p<0.001$  for all). Teenagers made a good mean number of antenatal clinic visits (16.4 vs. 16.5), but were more likely to have attended fewer than half of the recommended visits (3.0% [n=210] 2.9% [n=155] vs. 1.4% [n=716]).

Teenagers faced increased risks of several obstetric complications, e.g. anaemia (adjusted odds ratio 1.8, 95% confidence interval 1.6 to 2.1), proteinuria (1.8, 1.2 to 2.6) urinary tract infection (UTI) (2.9, 1.8 to 4.8) pyelonephritis (6.3, 3.8 to 10.4) and eclampsia (3.2, 1.4 to 7.3), the risks increasing with descending age for most outcomes. Elevated risks of pre-eclampsia (3.7, 1.5 to 9.0) and preterm delivery (2.5, 1.2 to 5.3) were also found among 13–15-year-olds. However, teenage mothers were

1  
2  
3  
4  
5  
6  
7  
8  
9 37 more likely to have vaginal delivery (1.9, 1.7 to 2.0) without complications. Inadequate prenatal care  
10  
11 38 among teenagers was a risk factor of eclampsia (12.6, 2.6 to 62.6), UTI (5.8, 1.7 to 19.7) and adverse  
12  
13 39 neonatal outcomes.  
14

15  
16 40 **Conclusions:** Pregnant teenagers tended to be socioeconomically disadvantaged vs. controls and  
17  
18 41 faced higher risks of various pregnancy complications. Special attention should be paid to enrolling  
19  
20 42 teenagers into adequate prenatal care in early pregnancy.  
21

22 43 Word count: 2992  
23  
24  
25 44  
26  
27  
28 45  
29  
30 46  
31  
32  
33 47  
34  
35  
36 48  
37  
38 49  
39  
40 50  
41  
42 51  
43  
44 52  
45  
46 53  
47  
48  
49 54  
50  
51 55  
52  
53  
54  
55  
56  
57  
58  
59  
60

## ARTICLE SUMMARY

### Article focus

- Teenage pregnancy is associated with maternal anaemia and preterm birth. Association with other adverse obstetric outcomes, especially maternal complications, is less clear.
- Adequate antenatal care among teenagers has been shown to decrease adverse neonatal outcomes, but comprehensive care to all women was not offered in the previous study settings.
- We examined age-specific risks of adverse obstetric outcomes among teenagers, focusing on maternal pregnancy complications and the role of inadequate antenatal care.

### Key messages

- In addition to a higher risk of anaemia, elevated risks of urinary tract infection, pyelonephritis, proteinuria and eclampsia were found among teenagers as well as pre-eclampsia and preterm delivery among the youngest girls.
- Inadequate antenatal care may place teenagers at markedly elevated risks of urinary tract infection, eclampsia and adverse neonatal outcomes even in a welfare society offering high-quality care to all pregnant women.

### Strengths and limitations of this study

- The present study was nationwide, giving a realistic reflection of the situation regarding obstetric challenges among all teenage pregnancies during the study period.
- We were able to investigate a number of factors that have been sparsely reported in connection with teenage pregnancies, including proteinuria, cystitis and pyelonephritis during pregnancy, fear of childbirth and pain relief during delivery.
- Our study was retrospective and we could not look at the socioeconomic or educational status of women.



## INTRODUCTION

Pregnancy during teenage years is associated with socioeconomic and health inequalities as regards both mother and child,<sup>1-5</sup> including higher risks of deprivation,<sup>2</sup> behavioural and emotional difficulties,<sup>2</sup> maltreatment,<sup>1</sup> morbidity<sup>1</sup> and premature mortality.<sup>1-4</sup> Therefore, it is a global concern.

Although most pronounced in developing countries, teenage pregnancy ~~also~~ remains a significant problem also in the developed world. The incidence of teenage pregnancy ending in delivery varies widely, with Nordic countries having comparatively low rates: 6/1000 in Sweden<sup>6</sup> and 9/1000 in Finland,<sup>6</sup> compared with 24/1000 in England and Wales<sup>7</sup> and 34/1000 in the USA in 2010.<sup>8</sup>

Obstetric risks are often divided into categories of maternal complications, mode of delivery and its complications, and neonatal outcome. Teenage pregnancies are associated with maternal anaemia,<sup>9</sup> hypertensive problems<sup>13-1415</sup> and preterm~~mature~~ birth,<sup>16-195-17</sup> while low risks as regards delivery complications have been reported in studies carried out in industrialised countries.<sup>9-122 197</sup> However, results concerning several adverse outcomes vary largely, possibly as a result of the great number of confounding factors. Poor socioeconomic conditions,<sup>1 9 10</sup> risky health behaviour,<sup>9 12</sup> inadequate prenatal care<sup>187 20-21-49</sup> and biological immaturity<sup>16-185-17</sup> have been suggested as possible explanations for adverse obstetric outcomes.

Although the issue of teenage pregnancy has been widely studied, a consensus of opinion on obstetric risks is lacking. Comprehensive, age-specific studies concerning maternal complications remain sparse.<sup>9 176</sup> In addition, the role of prenatal care in regard to these problems is not well established.

The objective of the present study was to investigate the risks of adverse obstetric outcomes in teenagers in a country with a low rate of adolescent births and comprehensive high-quality prenatal

care, with special focus on maternal complications during pregnancy. Secondly, we aimed to focus on the effect on these outcomes of a low number of visits to antenatal clinics.

## MATERIAL AND METHODS

### Study population

We identified all childbirths (n=354 833, of which 349 531 were singleton births) between ~~1 January 2006 and 31 December 2011~~ ~~2006 and 2011~~ in Finland using the national Medical Birth Register (MBR). Only singleton pregnancies of nulliparous women (n=97 838) were included. Cases of major congenital anomaly (~~defined as major anatomical anomaly, chromosomal anomaly or congenital hypothyroidism~~)<sup>22</sup> were excluded (n=4149). After exclusion, there was a total of 7305 singleton childbirths among 13–19-year-old nulliparous girls and women, further divided into three groups: 13–15-year-olds (n=84), 16–17-year-olds (n=1234), and 18–19-year-olds (n=5987). Singleton deliveries (n=51 142) among women aged 25–29 years served as reference material. Women with histories of abortion and miscarriage (n=11 703, 20.1%) were included.

### Data collection

The study data were obtained from the MBR and the Hospital Discharge Register (HDR), maintained by the National Institute for Health and Welfare. Reporting to these national registers is obligatory and the data has been shown to be valid and to reflect good coverage.<sup>239</sup> Data for the MBR is collected at all maternity hospitals in Finland.<sup>241</sup> It covers all live births and stillbirths with a birth weight of 500 grams or more or with a gestational age of 22 weeks or more. ~~The~~

Formatted: Font: 12 pt

Formatted: Font: 12 pt

Formatted: Font: 12 pt, Font color: Auto

1  
2  
3  
4  
5  
6  
7  
8  
9 122 register includes information on maternal demographic factors, prenatal care, interventions and  
10  
11 123 common diagnoses during pregnancy and delivery and neonatal outcomes until the age of seven days.  
12  
13  
14 124 The HDR contains information on all in-patient periods in public and private hospitals and out-patient  
15  
16 125 visits in the public sector. The information includes diagnosis (ICD-10 codes), dates of admission and  
17  
18 126 discharge and the code of the hospital or other institution. We collected the data separately for  
19  
20 127 pregnancy and delivery (delivery complications include diagnoses reported from the start of delivery  
21  
22 128 until 42 days postpartum). Each complication was noted once per woman.

### 23 24 129 **Study variables**

25  
26  
27 130 The choice of study variables was based on previous literature and clinical relevance. All study  
28  
29 131 variables are listed with ICD-10 codes, unless derived from the MBR in a separate check-box.

30  
31  
32 132 **Maternal outcomes:** ~~of interest were~~ anaemia (haemoglobin below 100 g/l), pregnancy-induced  
33  
34 133 hypertension (PIH) (O13, O16), pre-eclampsia (O14), eclampsia, proteinuria (O12 excluding O12.0),  
35  
36 134 gestational diabetes, intrahepatic cholestasis of pregnancy (O26.6), *placenta praevia*, sexually  
37  
38 135 transmitted infections (*Chlamydia trachomatis* [A56], *Neisseria gonorrhoeae* and syphilis [A51-A54]),  
39  
40 136 urinary tract infection (UTI) (N30, N34, N39.0, O23.1–O23.4, O23.9), pyelonephritis (N10, N12, O23.0),  
41  
42 137 chorioamnionitis (O41.1), ~~proteinuria (O12 excluding O12.0), preterm contractions (before 37 weeks~~  
43  
44 138 ~~of gestation; O47.0)~~, bleeding in early pregnancy (O20) and fear of childbirth (O99.80).

45  
46  
47 139 **Delivery outcomes:** ~~of interest were~~ mode of delivery (vaginal delivery, vaginal breech delivery,  
48  
49 140 assisted vaginal delivery [vacuum extraction or forceps] and Caesarean section [elective, urgent and  
50  
51 141 emergency]), induction of labour, use of oxytocin, episiotomy, pain relief during delivery (regional

Formatted: Space Before: 12 pt

1  
2  
3  
4  
5  
6  
7  
8  
9  
10  
11  
12  
13  
14  
15  
16  
17  
18  
19  
20  
21  
22  
23  
24  
25  
26  
27  
28  
29  
30  
31  
32  
33  
34  
35  
36  
37  
38  
39  
40  
41  
42  
43  
44  
45  
46  
47  
48  
49  
50  
51  
52  
53  
54  
55  
56  
57  
58  
59  
60

anaesthesia, other medication and non-medical pain relief), anal sphincter rupture, shoulder dystocia, placental abruption, uterine curettage, abnormal bleeding during (O67) and after delivery (O72), uterine rupture (O71.0–O71.1) and postpartum infection (O85, O86, N71, N72).

**Neonatal outcomes:** ~~selected for analysis were~~ preterm birth (extremely preterm [ $<28$  weeks] and preterm [ $<37$  weeks of gestation]), birth weight adjusted for gestational age according to the Finnish fetal growth curves<sup>25a</sup> (divided into small-for-gestational-age [SGA, defined as  $<-2$  SD], average-for-gestational-age [AGA] and large-for-gestational age [LGA, defined as  $>+2$  SD]), 5-min Apgar score below 7, cord blood pH below 7.05 at birth, resuscitation of the newborn, use of a respirator, use of antibiotics, phototherapy, admission to a neonatal intensive care unit, stillbirth intrauterine fetal death (delivery of a stillborn at 22 weeks of gestation or later) and neonatal death (death of a live-born at 0–6 days of age).

**Demographic factors** are presented in Table 1. Of these, alcohol or drug misuse during pregnancy (Z72.1–Z72.2), pre-existing diabetes (E10–E12, O24.0–O24.3) and pre-existing hypertension (I10, O10–O11) were derived from the HDR and other variables from the MBR.

156 **Table 1. Demographic characteristics according to age group (years)**

|                                                | 13–15     | 16–17      | 18–19       | All teenagers | 25–29         | P* for difference |
|------------------------------------------------|-----------|------------|-------------|---------------|---------------|-------------------|
| <b>n</b>                                       | 84        | 1234       | 5987        | 7305          | 51 142        |                   |
| <b>Cohabitation status</b>                     |           |            |             |               |               |                   |
| Married/cohabiting                             | 13 (15.5) | 598 (48.5) | 4248 (71.0) | 4859 (66.5)   | 45 262 (88.5) | <0.001            |
| Single                                         | 45 (53.6) | 471 (38.2) | 1132 (18.9) | 1644 (22.5)   | 2608 (5.1)    |                   |
| Missing data                                   | 26 (30.9) | 165 (13.3) | 607 (10.1)  | 802 (11.0)    | 3272 (6.4)    |                   |
| <b>Type of residence</b>                       |           |            |             |               |               |                   |
| Urban                                          | 52 (61.9) | 820 (66.5) | 3980 (66.5) | 4852 (66.4)   | 37589 (73.5)  | <0.001            |
| Densely populated                              | 14 (16.7) | 185 (15.0) | 1050 (17.5) | 1249 (17.1)   | 7313 (14.3)   |                   |
| Rural                                          | 16 (19.0) | 222(18.0)  | 930 (15.5)  | 1168 (16.0)   | 6035 (11.8)   |                   |
| Missing data                                   | 2 (2.4)   | 7 (0.5)    | 27 (0.5)    | 36 (0.5)      | 205 (0.4)     |                   |
| <b>Smoking during pregnancy</b>                |           |            |             |               |               |                   |
| Yes                                            | 28 (33.3) | 506 (41.3) | 2127 (35.5) | 2661 (36.4)   | 3580 (7.0)    | <0.001            |
| Quit during 1st trimester                      | 11(13.1)  | 157 (12.7) | 725 (12.1)  | 893 (12.2)    | 3324 (6.5)    |                   |
| Missing data                                   | 6 (7.1)   | 37 (3.0)   | 171 (2.9)   | 214 (2.9)     | 921 (1.8)     |                   |
| <b>Alcohol or drug misuse during pregnancy</b> | 3 (3.6)   | 14 (1.1)   | 65 (1.1)    | 82 (1.1)      | 96 (0.2)      | <0.001            |
| <b>BMI before pregnancy</b>                    |           |            |             |               |               |                   |
| Underweight**                                  | 16 (19.0) | 155 (12.6) | 57 (9.6)    | 228 (10.3)    | 1841 (3.6)    | <0.001            |
| Obese***                                       | 109 (1.3) | 63 (5.1)   | 395 (6.6)   | 567 (6.3)     | 4347 (8.5)    |                   |
| Missing data                                   | 6 (7.1)   | 57 (4.6)   | 174 (2.9)   | 237 (3.2)     | 1074 (2.1)    |                   |
| <b>History of spontaneous abortion(s)</b>      | 2 (2.4)   | 51 (4.1)   | 479 (8.0)   | 532 (7.3)     | 5984 (11.7)   | <0.001            |
| <b>Pre-existing hypertension</b>               | 0 (0)     | 1 (0.1)    | 6 (0.1)     | 7 (0.1)       | 102 (0.2)     | 0.026             |
| <b>Pre-existing diabetes</b>                   | 0 (0)     | 7 (0.6)    | 42 (0.7)    | 49 (0.7)      | 358 (0.7)     | 0.834             |

157 Data expressed as n (%).

158 \*P-values refer to differences between all the age groups.

159 \*\*BMI <18.5 kg/m<sup>2</sup>

160 \*\*\*BMI ≥ 30.0 kg/m<sup>2</sup>

Formatted: Font color: Auto

Formatted: Indent: Left: 0"

1  
2  
3  
4  
5  
6  
7  
8  
9  
10  
11  
12  
13  
14  
15  
16  
17  
18  
19  
20  
21  
22  
23  
24  
25  
26  
27  
28  
29  
30  
31  
32  
33  
34  
35  
36  
37  
38  
39  
40  
41  
42  
43  
44  
45  
46  
47  
48  
49  
50  
51  
52  
53  
54  
55  
56  
57  
58  
59  
60

The area of residence at the time of delivery was divided into urban, densely populated or rural according to national classification by Statistics Finland.<sup>263</sup> Pre-pregnancy BMI was calculated on the basis of height and weight measures reported by the pregnant women. ~~As the “adult” BMI curve plateau is seen at 15–16 years of age, and the total number of teenagers below this age was small in our study, we used the same BMI for adolescents and adults instead of using the ISO-BMI for adolescents.~~

Adequacy of prenatal care was calculated on the basis of the ~~recommended~~expected number of antenatal clinic visits in Finland (13-17 visits in full term pregnancies)<sup>274</sup> adjusted for gestational age at birth. Inadequate prenatal care was defined as attendance at fewer than half of the recommended number of visits.

### Statistical analysis

To assess differences between age groups, the  $\chi^2$  test and Fisher’s exact test were used as appropriate. A P-value <0.05 was defined as statistically significant. ~~To determine the~~ estimated risks (unadjusted and adjusted odds ratios [ORs] with their 95% confidence intervals [CIs]) of adverse outcomes were ~~calculated unadjusted and adjusted odds ratios (ORs) with their 95% confidence intervals (CIs), using binary logistic regression. To minimise confounding effects, we used several multivariate models depending on the outcome variable analysed.~~ Our basic multivariate model included all demographic factors presented in Table 1 (except for history of spontaneous abortions, which was used for preterm birth only) and adequacy of prenatal care. Pregnancy complications were added to the model when found to be clinically relevant. Variables were removed from the model when necessary as a result of small numbers of cases ~~regarding rare adverse outcomes.~~

1  
2  
3  
4  
5  
6  
7  
8  
9  
10 A subgroup analysis was carried out including only teenagers, dividing the group into those with  
11 inadequate and adequate prenatal care ([reference group](#)). ~~The risks were~~We analysed [using binary](#)  
12 [logistic regression](#). ~~unadjusted and adjusted estimates of risk (ORs) with their 95% CIs using the group~~  
13 ~~with adequate care as the control group. For the multivariate model, w~~We used the basic multivariate  
14 ~~model (see above), excluding pre-existing hypertension and diabetes as a result of small numbers of~~  
15 ~~cases. We also used preterm birth as a confounding factor when analysing the estimated risks of a low~~  
16 ~~Apgar score, need of intensive care, and death. We did not use other confounding factors in the~~  
17 ~~subgroup analysis because teenagers with inadequate prenatal care might have been diagnosed with~~  
18 ~~pregnancy complications less often as a result of a low number of visits, thus causing possible bias.~~  
19  
20  
21  
22  
23  
24  
25  
26  
27  
28 To ~~further~~ minimise bias, we used list-wise deletion in logistic regression analysis when data was  
29 missing. The percentages of missing cases as regards demographic factors are shown in Table 1.  
30  
31  
32  
33 IBM SPSS statistics 19.0 and 20.0 for Windows were used for the statistical analyses.  
34

## 35 RESULTS

### 38 Demographics

39  
40  
41 All the demographic characteristics of the teen-agers vs. the reference women differed significantly,  
42 except for pre-existing diabetes (Table 1). Pregnant teenagers were more likely to be single, live in a  
43 rural area, smoke and be diagnosed with misuse of alcohol or drugs during pregnancy. Pre-existing  
44 hypertension was more common in the reference group.  
45  
46  
47  
48  
49  
50  
51  
52  
53  
54  
55  
56  
57  
58  
59  
60

All groups showed a good mean number of visits to an antenatal clinic (Table 2). However, teenagers started their prenatal care significantly later in pregnancy. All teenage groups were also more likely to show a significantly lower attendance rate.

Table 2: Prenatal care according to age group (years)

|                                              | 13–15      | 16–17      | 18–19       | All teenagers | 25–29        | P* for difference |
|----------------------------------------------|------------|------------|-------------|---------------|--------------|-------------------|
| n                                            | 84         | 1234       | 5987        | 7305          | 51 142       |                   |
| All anteprenatal visits (Mean ± SD)          | 14.6 ± 6.0 | 16.1 ± 5.8 | 16.5 ± 5.3  | 16.4 ± 5.4    | 16.5 ± 4.7   | <0.001            |
| Hospital polyclinic visits (Mean ± SD)       | 4.3 ± 2.3  | 3.7 ± 2.9  | 3.1 ± 2.7   | 3.2 ± 2.8     | 2.7 ± 2.5    | <0.001            |
| First anteprenatal visit, gestational weeks  | 18.8 ± 9.0 | 12.6 ± 7.2 | 10.2 ± 5.0  | 10.7 ± 5.6    | 9.0 ± 3.1    | <0.001            |
| First antenatal visit ≥ 20 gestational weeks | 43 (51.2)  | 192 (15.6) | 358 (6.0)   | 593 (8.1)     | 728 (1.4)    | <0.001            |
| Low attendance (%)                           |            |            |             |               |              |                   |
| <50% of expected visits                      | 4 (4.9)    | 65 (5.4)   | 141 (2.4)   | 210 (3.0)     | 691 (1.4)    | <0.001            |
| 1st trimester ultrasonographic screening     | 30 (35.7)  | 671 (54.4) | 3733 (62.4) | 4434 (60.7)   | 37429 (73.2) | <0.001            |
| 2nd trimester ultrasonographic screening     | 45 (53.6)  | 850 (68.9) | 4299 (71.8) | 5194 (71.1)   | 39620 (77.5) | <0.001            |

\* P-values refer to differences between all the age groups.

Formatted Table

Formatted: Font color: Auto

### Pregnancy complications

Significantly increased risks of anaemia, eclampsia, proteinuria, UTIs and pyelonephritis were noted among the teenagers. The youngest group of teenagers (13–15-year-olds) had an elevated risk of pre-eclampsia and a small excess risk was also noted among 18–19-year-olds after controlling for confounding factors (Table 3). The frequency of gestational diabetes (5.3% [n=385] vs. 8.2% [n=4173], adjusted odds ratio [adj. OR] 0.7, 95% CI 0.6 to 0.7) and *placenta praevia* (0.04% [n=3] vs. 0.3%



1  
2  
3  
4  
5  
6  
7  
8  
9 213 [n=161], adj. OR 0.1, 0.01 to 0.8) was lower among 13—19-year-olds, ~~whereas teenagers were more~~  
10  
11 214 ~~often diagnosed with preterm contractions (4.0% [n=289] vs. 2.6% [n=1333], adj. OR 1.5, 1.3 to 1.7)~~  
12  
13 215 ~~compared with reference women. Although the differences between 13—15-year-olds and the~~  
14  
15 216 ~~reference group were non-significant, as regards gestational diabetes, placenta praevia and preterm~~  
16  
17 217 ~~contractions,~~ as was the case between 16—17-year-olds and the reference group as regards *placenta*  
18  
19 218 *praevia*.

219 **Table 3: Maternal complications during pregnancy according to age group**

|                                     |                  | <u>Maternal age in years</u> |                   |                   |                   |            |
|-------------------------------------|------------------|------------------------------|-------------------|-------------------|-------------------|------------|
|                                     |                  | 13–15                        | 16–17             | 18–19             | All teenagers     | 25–29      |
| <b>n</b>                            |                  | 84                           | 1234              | 5987              | 7305              | 51 142     |
| <b>Anaemia</b> <sup>*M1</sup>       | n (%)            | 6 (7.1)                      | 64 (5.2)          | 245 (4.1)         | 315 (4.3)         | 1227 (2.4) |
|                                     | OR (95% CI)      | 3.2 (1.4 to 7.3)             | 2.3 (1.7 to 2.9)  | 1.8 (1.5 to 2.0)  | 1.9 (1.7 to 2.1)  |            |
|                                     | Adj. OR (95% CI) | 3.1 (1.3 to 7.3)             | 2.2 (1.7 to 2.9)  | 1.8 (1.2 to 2.1)  | 1.8 (1.6 to 2.1)  | 1 (Ref.)   |
| <b>Pre-eclampsia</b> <sup>M2</sup>  | n (%)            | 6 (7.1)                      | 26 (2.1)          | 182 (3.0)         | 214 (2.9)         | 1522 (3.0) |
|                                     | OR (95% CI)      | 2.5 (1.1 to 5.8)             | 0.7 (0.5 to 1.0)  | 1.0 (0.9 to 1.2)  | 1.0 (0.9 to 1.1)  |            |
|                                     | Adj. OR (95% CI) | 3.7 (1.5 to 9.0)             | 0.9 (0.6 to 1.4)  | 1.2 (1.0 to 1.5)  | 1.2 (1.0 to 1.4)  | 1 (Ref.)   |
| <b>Eclampsia</b> <sup>M4</sup>      | n (%)            | 0 (0.0)                      | 2 (0.2)           | 9 (0.2)           | 11 (0.2)          | 26 (0.1)   |
|                                     | OR (95% CI)      | -                            | 3.2 (0.8 to 13.5) | 3.9 (1.4 to 6.3)  | 3.0 (1.4 to 6.0)  |            |
|                                     | Adj. OR (95% CI) | -                            | 2.3 (0.3 to 18.2) | 3.3 (1.4 to 7.8)  | 3.2 (1.4 to 7.3)  | 1 (Ref.)   |
| <b>Proteinuria</b> <sup>M3</sup>    | n (%)            | 2 (2.4)                      | 9 (0.7)           | 32 (0.5)          | 43 (0.6)          | 171 (0.3)  |
|                                     | OR (95% CI)      | 7.3 (1.8 to 29.8)            | 2.2 (1.1 to 4.3)  | 1.6 (1.1 to 2.3)  | 1.8 (1.3 to 2.5)  |            |
|                                     | Adj. OR (95% CI) | 12.3 (2.8 to 53.6)           | 2.4 (1.1 to 5.2)  | 1.6 (1.0 to 2.5)  | 1.8 (1.2 to 2.6)  | 1 (Ref.)   |
| <b>UTI</b> <sup>M5</sup>            | n (%)            | 0 (0.0)                      | 6 (0.5)           | 21 (0.4)          | 27 (0.4)          | 75 (0.1)   |
|                                     | OR (95% CI)      | -                            | 3.3 (1.4 to 7.7)  | 2.4 (1.5 to 3.9)  | 2.5 (1.6 to 3.9)  |            |
|                                     | Adj. OR (95% CI) | -                            | 4.1 (1.7 to 10.2) | 2.7 (1.6 to 4.6)  | 2.9 (1.8 to 4.8)  | 1 (Ref.)   |
| <b>Pyelonephritis</b> <sup>M6</sup> | n (%)            | 0 (0.0)                      | 8 (0.6)           | 27 (0.5)          | 35 (0.5)          | 45 (0.1)   |
|                                     | OR (95% CI)      | -                            | 7.4 (3.5 to 15.8) | 5.1 (3.2 to 8.3)  | 5.5 (3.5 to 8.5)  |            |
|                                     | Adj. OR (95% CI) | -                            | 9.6 (4.2 to 21.9) | 5.8 (3.4 to 10.0) | 6.3 (3.8 to 10.4) | 1 (Ref.)   |

Formatted Table

220 \* Haemoglobin < 100 g/l.

221 **All the variables are adjusted according to multivariate models:**

222 **M1:** Demographic variables (Table 1 – history of spontaneous abortions) + adequacy of prenatal care

223 **M2:** M1 + (PIH and proteinuria)

224 **M3:** M1 + PIH

225 **M4:** M3 – misuse of alcohol or drugs and pre-existing hypertension

226 **M5:** M1 – misuse of alcohol or drugs

227 **M6:** M1 – pre-existing hypertension

Formatted: Font: Bold

There were no statistically significant differences between the groups as regards PIH (3.2% [n=233] vs. 4.2% [n=2158]), chorioamnionitis (0.6% [n=44] vs. 0.7% [n=377]), STIs (0.05% [n=10] vs. 0.02% [n=34]), bleeding in early pregnancy (0.4% for both [n=27 vs. 190]), intrahepatic cholestasis of pregnancy (1.1% [n=79] vs. 0.9% [n=460]) or fear of childbirth (1.3% for both [n=98 vs. 659]).

Regarding pregnancy complications among teenagers, we evaluated their effects on other adverse obstetric outcomes. Anaemia was a risk factor for very preterm birth (~~un~~adjusted odds ratio [2.1, 1.1 to 4.2](#)), 5-min Apgar score of less than 7 ([1.6, 1.2 to 2.1](#)) and shoulder dystocia ([2.8, 1.4 to 5.5](#)). Proteinuria was found to be a risk factor for pre-eclampsia ([5.47-7, 3.65-4 to 8.010-8](#)), but not for eclampsia or adverse neonatal outcomes. UTI [and pyelonephritis](#) did not affect the risks of adverse obstetric outcomes, ~~whereas pyelonephritis was a risk factor for IUGR (3.67, 1.1 to 12.20~~

### Delivery outcomes

The estimated risks (adj. OR) among all teenagers (13–19 years of age) compared with the reference women were: Caesarean section 0.6 (0.6 to 0.7), operative vaginal delivery 0.6 (0.6 to 0.7), anal sphincter rupture 0.4 (0.3 to 0.5) and breech presentation 0.7 (0.6 to 0.8) (Figure 1). However, when analysed in subgroups according to age, the estimated risks among 13–15-year-olds did not differ significantly from those in the reference group, except for Caesarean section.

The percentages of planned Caesarean sections were similar among 13–15-year-olds and the reference women (4.8 % [n=4] vs. 4.5% [n=2301]), but significantly lower among 16–17- and 18–19-year-olds (2.4 % [n=30] and 3.2% [n=192], respectively). Regarding urgent Caesarean sections, the

1  
2  
3  
4  
5  
6  
7  
8  
9  
10  
11  
12  
13  
14  
15  
16  
17  
18  
19  
20  
21  
22  
23  
24  
25  
26  
27  
28  
29  
30  
31  
32  
33  
34  
35  
36  
37  
38  
39  
40  
41  
42  
43  
44  
45  
46  
47  
48  
49  
50  
51  
52  
53  
54  
55  
56  
57  
58  
59  
60

frequencies were lower among all teenagers (7.2% [n=524] vs. 11.7% [n=5996]) and descended according to age. In the case of emergency Caesarean sections, however, there were no significant differences (1.1% [n=83] vs. 1.5% [n=766]).

The frequencies of induction of labour and use of oxytocin during labour were similar in the teenagers and reference women (16.8% [n=1226] vs. 17.2% [n=8788] and 49.7% [n=3630] vs. 50.3% [n=25744] respectively). Episiotomy was performed less often in all teenage groups (39.1% [n=2861] vs. 41.2% [n=21511]), although the difference was non-significant as regards 13–15-year-olds. Combined regional anaesthesia was used significantly more often in all teenage groups compared with the reference women (72.5% [n=5296] vs. 66.3% [n=33907]).

The incidence of uterine curettage after childbirth was lower among all 13–19-year-olds (0.5% [n=40] vs. 0.9% [n=446]), but the significance disappeared when the subgroups were analysed separately. Differences in the incidence of abnormal bleeding after childbirth were non-significant between 13–15-year-olds (4.8% [n=4]) and the reference group (3.5% [n=1772]), but significantly lower among 16–17- and 18–19-year-olds (1.8% [n=22] and 2.1% [n=125] respectively). No differences were seen as regards shoulder dystocia (0.2% for both [n=9 vs. 116]), placental abruption (0.2% for both [n=19 vs. 13]), uterine rupture (none vs. 0.05% [n=24]), abnormal bleeding during delivery (0.2% for both [n=3 vs. 135]) and postpartum infection (0.5% [n=36] vs. 0.4% [n=229]).

### Neonatal outcomes

Table 4 summarises the incidences of various neonatal outcomes. No significant differences emerged between the 13–19- and 25–29-year-olds as regards ~~ss the proportions with a~~ 5-min Apgar score of less than 7 (2.5% [n=161] vs. 2.8% [n=1213]), cord blood pH below 7.05 at birth (1.9% [n=139] vs. 1.5%

1  
2  
3  
4  
5  
6  
7  
8  
9 269 [n=767]), resuscitation of the newborn (1.0% for both [n= 70 vs. 522]), use of a respirator (1.0% [n=74]  
10  
11 270 vs. 0.9% [n=456]) or use of antibiotics (6.6% [n=481] vs. 6.8% [n=3498]). Phototherapy was used  
12  
13 271 similarly among all groups, although the frequency was significantly lower among 18–19-year-olds  
14  
15 272 compared with the reference women (5.9% [n=443] vs. 6.8% [n=3457]).

273 Table 4: Neonatal outcomes according to age group

|                                                |                  | Maternal age in years          |                  |                  |                  |             |
|------------------------------------------------|------------------|--------------------------------|------------------|------------------|------------------|-------------|
|                                                |                  | 13–15                          | 16–17            | 18–19            | All teenagers    | 25–29       |
| n                                              |                  | 84                             | 1234             | 5987             | 7305             | 51 142      |
| <b>Extremely preterm &lt;28 w<sup>M3</sup></b> | n (%)            | 2 (2.4)                        | 3 (0.2)          | 23 (0.4)         | 28 (0.4)         | 149 (0.3)   |
|                                                | OR (95% CI)      | 8.5 (2.1 to 35.1)              | 0.8 (0.3 to 2.7) | 1.3 (0.9 to 2.1) | 1.3 (0.9 to 2.0) |             |
|                                                | Adj. OR (95% CI) | 5.4 (0.7 to 41.5)              | 0.3 (0.0 to 2.4) | 1.1 (0.6 to 1.9) | 1.0 (0.6 to 1.7) | 1 (Ref.)    |
| <b>Preterm &lt;37 w<sup>M2</sup></b>           | n (%)            | 11 (13.1)                      | 68 (5.5)         | 296 (4.9)        | 375 (5.1)        | 2440 (4.8)  |
|                                                | OR (95% CI)      | 3.0 (1.6 to 5.7)               | 1.1 (0.9 to 1.5) | 1.0 (0.9 to 1.2) | 1.1 (1.0 to 1.2) |             |
|                                                | Adj. OR (95% CI) | 2.5 (1.2 to 5.3)               | 1.0 (0.8 to 1.4) | 0.9 (0.8 to 1.1) | 1.0 (0.8 to 1.1) | 1 (Ref.)    |
| <b>SGA<sup>M1</sup></b>                        | n (%)            | 2 (2.4)                        | 52 (4.2)         | 199 (3.3)        | 253 (3.5)        | 1262 (2.5)  |
|                                                | OR (95% CI)      | 0.9 (0.2 to 3.5)               | 1.7 (1.3 to 2.3) | 1.4 (1.2 to 1.6) | 1.4 (1.2 to 1.6) |             |
|                                                | Adj. OR (95% CI) | 0.5 (0.1 to 2.1)               | 1.2 (0.9 to 1.6) | 1.0 (0.8 to 1.1) | 1.0 (0.8 to 1.2) | 1 (Ref.)    |
| <b>Intensive care<sup>M4</sup></b>             | n (%)            | 19 (22.6)                      | 138 (11.2)       | 654 (10.9)       | 811 (11.1)       | 5566 (10.9) |
|                                                | OR (95% CI)      | 2.4 (1.4 to 4.0)               | 1.0 (0.9 to 1.2) | 1.0 (0.9 to 1.1) | 1.0 (0.9 to 1.1) |             |
|                                                | Adj. OR (95% CI) | 1.9 (1.0 to 3.4)               | 0.9 (0.7 to 1.1) | 0.9 (0.8 to 1.0) | 0.9 (0.8 to 1.0) | 1 (Ref.)    |
| <b>Stillbirth/neonatal death<sup>M5</sup></b>  | n (%)            | 2 (2.4)                        | 4 (0.3)          | 34 (0.6)         | 40 (0.5)         | 180 (0.4)   |
|                                                | OR (95% CI)      | 6.9 (1.7 to 28.3)              | 0.9 (0.3 to 2.5) | 1.6 (1.1 to 2.3) | 1.6 (1.1 to 2.2) |             |
|                                                | Adj. OR (95% CI) | 0.4 (0.0 to 5.1) <sup>M6</sup> | 0.6 (0.1 to 2.7) | 1.4 (0.8 to 2.4) | 1.2 (0.7 to 2.1) | 1 (Ref.)    |

274 **All the variables are adjusted according to multivariate models:**

- 275 **M1:** Demographic variables (Table 1 – history of spontaneous abortions) + adequacy of prenatal care, gestational diabetes, PIH, placental
- 276 **M2:** M1 + anaemia + history of spontaneous abortions
- 277 **M3:** M2 – misuse of alcohol or drugs
- 278 **M4:** M1 + preterm birth and IUGR
- 279 **M5:** M4 – (misuse of alcohol or drugs and pre-existing hypertension)
- 280 **M6:** M5 – (BMI and pre-existing diabetes)

Formatted: Font: Bold

## Adequacy of prenatal care

To investigate the effect of low antenatal clinic attendance on obstetric outcomes, we performed a subgroup analysis of 210 teenagers with inadequate prenatal care compared with 6 905 teenagers with adequate care. Teenagers with inadequate prenatal care were significantly more likely to be single (33.3% [n=67] vs. 22.1% [n=1526],  $P<0.001$ ) and to live in an urban area (73.9% [n=155] vs. 66.4% [n=485],  $P=0.03$ ). Although the rate of smoking during pregnancy did not differ statistically significantly in the two groups (43.9% [n=92] vs. 37.3% [n=2576],  $P=0.07$ ), teenagers with inadequate prenatal care were less likely to quit smoking during the 1<sup>st</sup> trimester (6.3% [n=13] vs. 12.8% [n=884],  $P=0.008$ ). No significant differences between the groups emerged as regards being underweight (11.4% [n=138] vs. 10.4% [n=718],  $P=0.62$ ) or obese (4.7% [n=10] vs. 6.3% [n=435],  $P=0.40$ ), or ~~as regards~~ misuse of alcohol or drugs during pregnancy (0.5% [n=1] vs. 1.2% [n=81],  $P=0.73$ ).

Teenagers with inadequate prenatal care were at significantly higher risks of eclampsia and UTI, even after adjustment for confounding factors (Table 5). No excess risks ~~of as regards~~ delivery complications were seen. The increased risk of ~~stillbirthperinatal~~ and neonatal mortality was almost entirely explained by premature births among teenagers with inadequate prenatal care.

Table 5: Maternal complications during pregnancy and neonatal outcomes according to adequacy of prenatal care.

|                                                   |                  | Inadequate prenatal care | Adequate prenatal care |
|---------------------------------------------------|------------------|--------------------------|------------------------|
| n                                                 |                  | 210                      | 6905                   |
| <b>PREGNANCY COMPLICATIONS</b>                    |                  |                          |                        |
| <b>Eclampsia<sup>M4</sup></b>                     | n (%)            | 2 (1.0)                  | 7 (0.1)                |
|                                                   | OR (95% CI)      | 9.5 (2.0 to 45.9)        |                        |
|                                                   | Adj. OR (95% CI) | 12.6 (2.6 to 62.6)       | 1 (Ref.)               |
| <b>UTI<sup>M3</sup></b>                           | n (%)            | 3 (1.4)                  | 24 (0.3)               |
|                                                   | OR (95% CI)      | 4.2 (1.2 to 13.9)        |                        |
|                                                   | Adj. OR (95% CI) | 5.8 (1.7 to 19.7)        | 1 (Ref.)               |
| <b>NEONATAL OUTCOMES</b>                          |                  |                          |                        |
| <b>Extremely preterm &lt;28 w<sup>M6</sup></b>    | n (%)            | 5 (2.4)                  | 20 (0.3)               |
|                                                   | OR (95% CI)      | 8.4 (3.1 to 22.6)        |                        |
|                                                   | Adj. OR (95% CI) | 0.7 (0.1 to 5.1)         | 1 (Ref.)               |
| <b>Preterm &lt;37 w<sup>M1</sup></b>              | n (%)            | 35 (16.7)                | 319 (4.6)              |
|                                                   | OR (95% CI)      | 4.1 (2.8 to 6.0)         |                        |
|                                                   | Adj. OR (95% CI) | 1.1 (0.7 to 1.7)         | 1 (Ref.)               |
| <b>Apgar at 5 min &lt;7<sup>M2</sup></b>          | n (%)            | 10 (5.8)                 | 140 (2.3)              |
|                                                   | OR (95% CI)      | 2.7 (1.4 to 5.1)         |                        |
|                                                   | Adj. OR (95% CI) | 1.9 (0.8 to 4.3)         | 1 (Ref.)               |
| <b>Intensive care<sup>M2</sup></b>                | n (%)            | 33 (15.7)                | 733 (10.6)             |
|                                                   | OR (95% CI)      | 1.6 (1.1 to 2.3)         |                        |
|                                                   | Adj. OR (95% CI) | 1.0 (0.6 to 1.7)         | 1 (Ref.)               |
| <b>Stillbirth/Pre/neonatal death<sup>M5</sup></b> | n (%)            | 5 (2.4)                  | 28 (0.4)               |
|                                                   | OR (95% CI)      | 6.0 (2.3 to 15.7)        |                        |
|                                                   | Adj. OR (95% CI) | 0.7 (0.1 to 7.1)         | 1 (Ref.)               |

All the variables are adjusted according to multivariate models:

**M1:** Demographic variables (Table 1 – pre-existing hypertension and diabetes)

**M2:** M1 + preterm birth – history of spontaneous abortions

**M3:** M1 – misuse of alcohol or drugs – history of spontaneous abortions

**M4:** M1 – misuse of alcohol or drugs, BMI and history of spontaneous abortions

**M5:** M2 – misuse of alcohol or drugs

Missing data as regards confounding variables in inadequate vs. adequate prenatal care group: cohabitation 17.1% vs. 9.7%, smoking 10.0% vs. 2.2%, BMI 19.5% vs. 2.1%.

Formatted: Font: Bold



## DISCUSSION

Our comprehensive population-based study indicated ~~that pregnant teenagers are at~~ an increased risk of eclampsia, proteinuria, ~~UTI~~cystitis, pyelonephritis and anaemia ~~among pregnant teenagers~~. The youngest teenagers ~~were also faced with~~also had a higher risk of pre-eclampsia. However, teenagers were more likely to ~~have a normal vaginal delivery~~ vaginally without delivery complications without excessive risks of delivery complications when compared with the reference women. ~~“at the best age for delivery” (25–29 years)~~. Regarding neonatal outcomes, the risk of preterm birth was increased among the youngest teenagers, whereas older teenagers were at risk of having SGA infants ~~and infants with IUGR. An increased risk of stillbirth/neonatal death was also found~~. Inadequate prenatal care among teenagers increased the risks of eclampsia, UTI and several adverse neonatal outcomes. Confounding factors affected the risks of most neonatal outcomes, but their roles ~~concerning~~as regards maternal complications were less significant.

The registers used for our study are of high quality and have been shown to be in accordance with delivery records.<sup>239</sup> We were able to investigate a number of factors that have been sparsely reported in connection with teenage pregnancies, such as proteinuria, ~~UTI~~cystitis and pyelonephritis during pregnancy, fear of childbirth and pain relief during delivery. Our study was nationwide, giving a complete and realistic reflection of the situation regarding obstetric challenges among all teenage pregnancies during the study period.

In Finland, ~~ante~~prenatal care, including routine visits to general practitioners and nurses/midwives, is provided free of charge by municipalities and used by virtually all pregnant women.<sup>285</sup> Specialised maternity units in public hospitals take care of practically all obstetric

1  
2  
3  
4  
5  
6  
7  
8  
9  
10  
11  
12  
13  
14  
15  
16  
17  
18  
19  
20  
21  
22  
23  
24  
25  
26  
27  
28  
29  
30  
31  
32  
33  
34  
35  
36  
37  
38  
39  
40  
41  
42  
43  
44  
45  
46  
47  
48  
49  
50  
51  
52  
53  
54  
55  
56  
57  
58  
59  
60

patients and births. In addition, fetal screening including early ultrasonography with a nuchal translucency scan, blood tests and structural ultrasonography is offered to all pregnant women.<sup>296</sup>

Thus, the opportunity to receive comprehensive prenatal care is available to all regardless of socioeconomic status or residence. This minimises the confounding effects which often complicate studies of this kind. We also divided teenagers into categories by age. Although evidence suggests that the risks of neonatal problems are higher in younger, biologically immature adolescents,<sup>165</sup><sup>187</sup> the majority of studies, especially those on maternal outcomes, have involved the use of a dichotomised study setting, neglecting the different stages of biological and psychological maturation in adolescents.<sup>10 12 19 3027-352</sup> The importance of choosing the right reference group cannot be underestimated. The age of 20—24 years has often been used for reference, but age groups of even 20—39 years are seen. Childbearing has commonly been postponed in recent decades, in parallel with women's increasing level of education. The mean age of primigravid women in Finland was approximately 28 years during the study period; thus we chose primigravid women of 25—29 years of age as a reference group.

Our study is retrospective, which remains a limitation. The reliability of the data depends on the accuracy of reporting. In addition, the database did not allow for identification of precise timing of the different events during pregnancy. There was more missing data regarding confounding effects in the teenage group, as in the subgroup of teenagers with inadequate prenatal care. We could not look at the socioeconomic or educational status of adolescents in this study. The MBR includes information on maternal occupation, which is, however, less relevant as regards teenagers and young adults. Unfortunately, there is no information on fathers in the MBR as a result of confidentiality rules. Had socioeconomic status been available for use in our multivariate models, this might have affected risks of adverse obstetric outcomes among teenagers. ~~socioeconomic status had been used in logistic regression analysis as a confounding factor, the~~

1  
2  
3  
4  
5  
6  
7 361 ~~risks of some outcomes among teenagers might have been smaller.~~ We were not able to obtain  
8  
9 362 information on weight gain during pregnancy. Poor weight gain is a known risk factor of adverse  
10  
11 363 neonatal outcomes, such as low birth weight. Our study group of 13—15-year-olds was small in  
12  
13 364 number, thus leading to lack of power in detecting risks of rare outcomes. However, in order we  
14  
15 365 ~~felt it important to analyse this group separately~~ to discover the effect of very young age on the  
16  
17 366 risk of adverse obstetric outcomes, this age group was analysed separately.  
18  
19

### 20 367 **Relevant results in relation to those of other studies**

21  
22  
23 368 Overall, there was a high rate of attendance at antenatal clinics, which was expected, as antenatal  
24  
25 369 care is offered free of charge to all pregnant mothers. It can be speculated that women not  
26  
27 370 reached by the antenatal care system may be socially disadvantaged in various areas of life. Poor  
28  
29 371 socioeconomic status is often known to precede teenage pregnancy.<sup>369 374</sup> This view is supported  
30  
31 372 by our finding that teenagers smoked and were diagnosed with misuse of alcohol or drugs  
32  
33 373 significantly more often than reference women. Similar findings come from many parts of the  
34  
35 374 developed world,<sup>9 11 19 385 396</sup> whereas early marriage and childbirth are more common in other,  
36  
37 375 often developing parts of the world, thus leading to different social circumstances and possibly  
38  
39 376 different pregnancy outcomes.

40  
41  
42 377 The increased risk of anaemia seen among teenagers is in accordance with findings from several  
43  
44 378 earlier studies.<sup>10-12 3229</sup> Physical growth and menstruation results in an increase in iron  
45  
46 379 requirements that is often not met by nutrition. This leads to a negative iron balance and makes  
47  
48 380 teenagers more susceptible to anaemia during pregnancy.<sup>4037</sup> Poor fetal outcomes may occur,  
49  
50 381 especially in cases of severe or first trimester anaemia.<sup>4037 4138</sup> In our study, anaemia was a risk  
51  
52 382 factor of very preterm birth, ~~a low 5-min Apgar score and shoulder dystocia.~~  
53  
54  
55  
56  
57  
58  
59  
60

1  
2  
3  
4  
5  
6  
7  
8  
9  
10  
11  
12  
13  
14  
15  
16  
17  
18  
19  
20  
21  
22  
23  
24  
25  
26  
27  
28  
29  
30  
31  
32  
33  
34  
35  
36  
37  
38  
39  
40  
41  
42  
43  
44  
45  
46  
47  
48  
49  
50  
51  
52  
53  
54  
55  
56  
57  
58  
59  
60

Previous studies carried out in industrialised countries have revealed no excess risks of pre-eclampsia or PIH among adolescents,<sup>9-12 192</sup> whereas higher risks have been reported in developing countries.<sup>14 15 341</sup> Our results are partly contradictory, indicating an ~~increased~~ ~~higher~~ risk of pre-eclampsia among the youngest teenagers. The relatively small number of pregnant mothers aged 13–15 years in our study places some uncertainty on this finding. ~~In two earlier studies, younger and older adolescents were distinguished.~~ A large Latin-American cross-sectional study revealed an increasing rate of pre-eclampsia with descending age, but there was no significant difference in risk after adjustment for confounding factors.<sup>176</sup> A French study revealed a lower risk among teenagers, but the number of very young teenagers was even smaller than in the present study.<sup>11</sup>

Our results confirm findings in earlier studies, showing an elevated risk of eclampsia among pregnant teenagers.<sup>4239 439</sup> A report by the National Center for Health Statistics in the US showed an increasing trend in frequency with descending age (0.6% in 10–14-year-olds and 0.3% among 25–29-year-olds).<sup>441</sup> Because of a smaller number of cases and rarity of the condition, we could not evaluate such a trend. The essential role of prenatal care in the prevention of eclampsia has been previously emphasised,<sup>452</sup> although not in studies confined to teenagers. We found a marked 12-fold risk of eclampsia among teenagers with inadequate versus adequate care, highlighting the importance of adequate prenatal care in teenage pregnancies.

We found an increasing risk of proteinuria in pregnancy with descending age. An earlier study on the risk factors of proteinuria during pregnancy revealed a 1.5-fold risk among women below the age of 20.<sup>462</sup> Although the outcome of isolated proteinuria is mostly favourable, it is sometimes known to precede pre-eclampsia and even eclampsia<sup>474 485</sup> and has been associated with preterm birth.<sup>496</sup> Whether or not isolated proteinuria is part of the same disease spectrum as pre-

1  
2  
3  
4  
5  
6  
7 405 eclampsia is controversial.<sup>463 5047</sup> In our study, proteinuria was found to be a risk factor ~~for~~  
8  
9 406 ~~regards~~ pre-eclampsia, but not eclampsia or adverse neonatal outcomes.  
10  
11  
12 407 Earlier studies on UTI and pyelonephritis in pregnant teenagers are sparse. ~~Th~~two UK studies  
13  
14 408 ~~reported~~ 1.5- to 1.6-fold risks of UTI<sup>10</sup> and pyelonephritis<sup>9</sup> ~~were reported~~ among all teenagers. In  
15  
16 409 contrast, no excess risk was found in a Latin American study in which teenagers were analysed in  
17  
18 410 subgroups by age.<sup>176</sup> Our findings suggest higher risks of both UTI and pyelonephritis, with a trend  
19  
20 411 toward a higher incidence with descending age. However, no cases were found among teenagers  
21  
22 412 of 13–15 years of age, possibly because of the relative rarity of these diagnoses. Only a hypothesis  
23  
24 413 for the reason behind the increased risks has been presented – reduced resistance to infections in  
25  
26 414 pregnant teenagers.<sup>10</sup> We speculate that teenagers might be sexually more active during  
27  
28 415 pregnancy compared with older women, placing them at a higher risk of UTI. In addition, poorer  
29  
30 416 recognition of symptoms of UTI could lead to delayed care and explain the increased risk of  
31  
32 417 pyelonephritis.  
33  
34  
35 418 UTIs, and pyelonephritis in particular, have been associated with higher risks of adverse neonatal  
36  
37 419 outcomes,<sup>5148 5249</sup> although they are preventable with early detection and antimicrobial care.<sup>539</sup>  
38  
39 420 ~~Pyelonephritis was a risk factor of IUGR among teenagers, but not adults in our study.~~  
40  
41 421 Regarding other infections, our results do not support earlier findings of a higher risk of  
42  
43 422 chorioamnionitis among adolescents compared with adult women.<sup>10 12</sup>  
44  
45  
46 423 ~~We detected~~Our findings of lower or similar risks of delivery complications and a higher incidence  
47  
48 424 of vaginal deliveries among teenagers, ~~which is~~ ~~are~~ in line with findings in most studies in the  
49  
50 425 developed world.<sup>9-12 193</sup> ~~Contradictory~~ ~~Opposite~~ findings ~~derive~~ ~~come~~ mainly from studies in  
51  
52 426 developing countries.<sup>176 352</sup> The use of pain relief, especially combined anaesthetic analgesia, was  
53  
54  
55  
56  
57  
58  
59  
60

1  
2  
3  
4  
5  
6  
7  
8  
9  
10  
11  
12  
13  
14  
15  
16  
17  
18  
19  
20  
21  
22  
23  
24  
25  
26  
27  
28  
29  
30  
31  
32  
33  
34  
35  
36  
37  
38  
39  
40  
41  
42  
43  
44  
45  
46  
47  
48  
49  
50  
51  
52  
53  
54  
55  
56  
57  
58  
59  
60

high in all groups and was used even more often in teenagers compared with older women. This is

in contrast to the results of a UK study.<sup>9</sup>

Three large retrospective cohort studies carried out in the US and Latin America revealed 1.2- to

2.0-fold risks of preterm birth and 1.1- to 1.5-fold risks of SGA infants among teenagers, with an

increasing trend with descending age.<sup>165-187</sup> ~~Only one of these studies showed an increased risk~~

~~(1.2 fold) of IUGR among adolescents aged 15 years or less compared with older mothers.<sup>17</sup>~~

Elevated (1.5-fold) risks of stillbirth and/or neonatal death were found among the youngest

teenagers. However, among older teenagers and after adjustment for gestational age, the risks

were either lower or non-significant.<sup>165-187</sup> These findings were largely confirmed in our study,

although some differences were seen, possibly as a result of a smaller study population and the

lack of socioeconomic status as a confounding factor. In addition, we found an excess risk of

preterm birth only among the youngest teenagers. The lack of risk among older teenagers might

be explained by the overall high quality and quantity of prenatal care in Finland.

In accordance with the results of several recent studies,<sup>2018 21-19 541</sup> we found higher risks of

adverse neonatal outcomes, including an excess risk of neonatal/infant mortality among teenagers

with inadequate prenatal care.<sup>27</sup>

### Unanswered questions and implications

Our results add to existing literature, showing higher risks of various maternal complications

among teenagers, often displaying an increasing trend with descending age. An increased risk of

proteinuria during pregnancy was found, an outcome not analysed in past studies dealing with

teenage pregnancy. Confirmation of this finding and its possible influence on other, more serious

obstetric outcomes is required. The effect of prenatal care on maternal outcomes should also be

1  
2  
3  
4  
5  
6  
7 449 further analysed in the future. Clinical studies on the mode of delivery and its complications would  
8  
9 450 shed more light on whether or not adolescents have better myometrial function compared with  
10  
11 451 older women or whether the higher incidence of uncomplicated vaginal births is a consequence of  
12  
13 452 other factors, such as more attentive care of adolescents. In addition to immediate obstetric risks,  
14  
15 453 studies on long-term consequences indicate a higher incidence of morbidity and preterm mortality  
16  
17 454 among both teenage mothers and their children,<sup>1 2 4</sup> and these risks should be examined in  
18  
19 455 greater detail in the future.

20  
21  
22 456  
23  
24 457 The present study has practical implications: in addition to prevention and treatment of anaemia  
25  
26 458 and eclampsia, screening and counselling in connection with proteinuria, cystitis and  
27  
28 459 pyelonephritis are important among pregnant adolescents. The higher risk of pre-eclampsia  
29  
30 460 among the youngest teenagers should also be kept in mind. Teenagers in a welfare society are not  
31  
32 461 a risk group as regards delivery complications, and neonatal outcomes are mainly good. However,  
33  
34 462 the younger the expectant mother, the greater are the risks of several maternal and neonatal  
35  
36 463 complications. Adequacy of prenatal care is of great importance in preventing serious adverse  
37  
38 464 obstetric outcomes. Thus, extra efforts should be made to reach all pregnant teenagers and enrol  
39  
40 465 them in adequate maternity care in early pregnancy.  
41  
42  
43 466  
44  
45  
46 467  
47  
48  
49  
50 468  
51  
52  
53 469  
54  
55  
56  
57  
58  
59  
60

1  
2  
3  
4  
5  
6  
7 **FOOTNOTES**  
8  
9

10 **Contributors:** OH, MG and SL had the initial research idea and all authors contributed to the  
11 design, interpretation and critical revision of data. All authors had full access to the data and take  
12 responsibility of the integrity of the data and accuracy of the data analysis. SL carried out the  
13 analysis and wrote the drafts of the paper with important intellectual input from all coauthors. All  
14 authors have approved the final version of the manuscript submitted for publication. OH and SL  
15 act as guarantors.  
16  
17  
18  
19  
20  
21  
22

23 **Funding statement:** Financial support from Helsinki University Central Hospital Research Funds  
24 and Clinical Graduate School in Pediatrics/Gynecology, University of Helsinki, Finland are gratefully  
25 acknowledged.  
26  
27  
28  
29

30 **Competing interests:** All authors have completed the ICMJE uniform disclosure form at  
31 [www.icmje.org/coi\\_disclosure.pdf](http://www.icmje.org/coi_disclosure.pdf) and declare: no support from any organisation for the  
32 submitted work; no financial relationships with any organisations that might have an interest in  
33 the submitted work in the previous three years; no other relationships or activities that could  
34 appear to have influenced the submitted work.  
35  
36  
37  
38  
39

40 **Ethical approval:** No ethical approval was required for the present study. [The organization](#)  
41 [responsible for the registers \(THL National Institute for Health and Welfare\) has given approval for](#)  
42 [the study \(Dnro THL/1008/5.05.00/2012\).](#)  
43  
44  
45  
46

47 **Data sharing:** No additional data available. Researchers can apply for the authorisation for the use  
48 of same health register data for scientific research from the register keeping organization (THL  
49 National Institute for Health and Welfare).  
50  
51  
52  
53  
54



1  
2  
3  
4  
5  
6  
7 **FIGURE LEGENDS**  
8

9  
10<sup>492</sup>  
11  
12<sup>493</sup> Figure 1: Frequencies (%) of operative delivery and other delivery outcomes according to age  
13  
14<sup>494</sup> group.

15  
16  
17  
18  
19  
20  
21  
22  
23  
24  
25  
26  
27  
28  
29  
30  
31  
32  
33  
34  
35  
36  
37  
38  
39  
40  
41  
42  
43  
44  
45  
46  
47  
48  
49  
50  
51  
52  
53  
54  
55  
56  
57  
58  
59  
60

For peer review only

## REFERENCES

1. Paranjothy S, Broughton H, Adappa R, Fone D. Teenage pregnancy: who suffers? *Arch Dis Child*. 2009;94:239-45.
2. E-Risk Study T. Teen-aged mothers in contemporary Britain. *J Child Psychol Psychiatry*. 2002;43:727-42.
3. Olausson PO, Haglund B, Weitoft GR, Cnattingius S. Teenage childbearing and long-term socioeconomic consequences: a case study in Sweden. *Fam Plann Perspect*. 2001;33:70-4.
4. Otterblad Olausson P, Haglund B, Ringback Weitoft G, Cnattingius S. Premature death among teenage mothers. *BJOG*. 2004;111:793-9.
5. Olausson PO, Cnattingius S, Haglund B. Teenage pregnancies and risk of late fetal death and infant mortality. *Br J Obstet Gynaecol*. 1999;106:116-21.
6. Perinatal statistics in the Nordic countries. Statistical Report 7/2012. [updated 2012 March 27; cited 2013 Apr 10]. Official Statistics of Finland, Health 2012. THL. Available from: [http://www.thl.fi/en\\_US/web/en/statistics/topics/reproductive\\_health/deliveries](http://www.thl.fi/en_US/web/en/statistics/topics/reproductive_health/deliveries).
7. Birth summary tables, England and Wales - 2010. [cited 2013 Aug 10]. Available from: <http://www.statistics.gov.uk/hub/population/births-and-fertility/live-births-and-stillbirths>.
8. Hamilton BE, Ventura SJ. Birth rates for U.S. teenagers reach historic lows for all age and ethnic groups. NCHS data brief, no 89. Hyattsville, MD: National Center for Health Statistics. 2012.
9. Gupta N, Kiran U, Bhal K. Teenage pregnancies: obstetric characteristics and outcome. *Eur J Obstet Gynecol Reprod Biol*. 2008;137:165-71.
10. Jolly MC, Sebire N, Harris J, Robinson S, Regan L. Obstetric risks of pregnancy in women less than 18 years old. *Obstet Gynecol*. 2000;96:962-6.
11. de Vienne CM, Creveuil C, Dreyfus M. Does young maternal age increase the risk of adverse obstetric, fetal and neonatal outcomes: a cohort study. *Eur J Obstet Gynecol Reprod Biol*. 2009;147:151-6.
12. Raatikainen K, Heiskanen N, Verkasalo PK, Heinonen S. Good outcome of teenage pregnancies in high-quality maternity care. *Eur J Public Health*. 2006;16:157-61.
13. Menacker F, Martin JA, MacDorman MF, Ventura SJ. Births to 10-14 year-old mothers, 1990-2002: trends and health outcomes. *Natl Vital Stat Rep*. 2004;53:1-18.
14. Rasheed S, Abdelmonem A, Amin M. Adolescent pregnancy in Upper Egypt. *Int J Gynaecol Obstet*. 2011;112:21-4.

1  
2  
3  
4  
5  
6  
7 526 15. Usta IM, Zoorob D, Abu-Musa A, Naassan G, Nassar AH. Obstetric outcome of teenage  
8 527 pregnancies compared with adult pregnancies. *Acta Obstet Gynecol Scand.* 2008;87:178-83.

10 528 165. Chen XK, Wen SW, Fleming N, Demissie K, Rhoads GG, Walker M. Teenage pregnancy and  
11 529 adverse birth outcomes: a large population based retrospective cohort study. *Int J Epidemiol.*  
12 530 2007;36:368-73.

14 531 176. Conde-Agudelo A, Belizan JM, Lammers C. Maternal-perinatal morbidity and mortality  
15 532 associated with adolescent pregnancy in Latin America: Cross-sectional study. *Am J Obstet Gynecol*  
16 533 2005;192:342-9.

18 534 187. Malabarey OT, Balayla J, Klam SL, Shrim A, Abenhaim HA. Pregnancies in young adolescent  
19 535 mothers: a population-based study on 37 million births. *J Pediatr Adolesc Gynecol.* 2012;25:98-  
20 536 102.

22 537 19. Fleming N, Ng N, Osborne C, Biederman S, Yasseen AS 3rd, Dy J, Rennicks White R, Walker M.  
23 538 Adolescent pregnancy outcomes in the province of ontario: a cohort study. *J Obstet Gynaecol*  
24 539 *Can.* 2013 Mar;35(3):234-45.

26 540 2018. Vieira CL, Coeli CM, Pinheiro RS, Brandao ER, Camargo KR Jr, Aguiar FP. Modifying effect of  
27 541 prenatal care on the association between young maternal age and adverse birth outcomes. *J*  
28 542 *Pediatr Adolesc Gynecol.* 2012;25:185-9.

30 543 2119. Debiec KE, Paul KJ, Mitchell CM, Hitti JE. Inadequate prenatal care and risk of preterm  
31 544 delivery among adolescents: a retrospective study over 10 years. *Am J Obstet Gynecol.*  
32 545 2010;203:122.e1-6.

34 546 22. Congenital anomalies 1993–2010. Statistical report 1/2013. [updated 2013 January 15; cited  
35 547 2013 June 24]. Official Statistics of Finland, Congenital Malformations. THL. Available from:  
36 548 [http://www.thl.fi/en\\_US/web/en/statistics/topics/reproductive\\_health/congenital\\_anomalies](http://www.thl.fi/en_US/web/en/statistics/topics/reproductive_health/congenital_anomalies).

38 549 230. Gissler M, Haukka J. Finnish health and social welfare registers in epidemiological research.  
39 550 *Norsk Epidemiologi.* 2004;14:113-20.

41 551 241. Gissler M, Teperi J, Hemminki E, Meriläinen J. Data quality after restructuring a nationwide  
42 552 medical birth registry. *Scand J Soc Med.* 1995;23:75-80.

44 553 252. Pihkala J, Hakala T, Voutilainen P, Raivio K. [Characteristics of recent fetal growth curves in  
45 554 Finland]. *Duodecim.* 1989;105:1540-6. Finnish.

47 555 263. Statistic Finland. 2012. Tilastokeskus - Statistikcentralen - Statistics Finland. [updated 2012  
48 556 March 27; cited 2013 Aug 10]. Available from: [www.tilastokeskus.fi/index\\_en.html](http://www.tilastokeskus.fi/index_en.html).

50 557 274. Viisainen K. [Screening and collaboration in Maternity care. Guidelines 1999.]. Jyväskylä:  
51 558 STAKES Oppaita 34; 1999. Finnish.

Formatted: Font: +Body (Calibri), No underline, Font color: Auto

Formatted: Line spacing: Multiple 1.15 li

Formatted: Font: +Body (Calibri), Not Bold, English (U.S.)

Formatted: English (U.S.)

Formatted: Font: (Default) +Body (Calibri), English (U.S.)

Formatted: No underline, Font color: Auto

1  
2  
3  
4  
5  
6  
7  
8  
9  
10  
11  
12  
13  
14  
15  
16  
17  
18  
19  
20  
21  
22  
23  
24  
25  
26  
27  
28  
29  
30  
31  
32  
33  
34  
35  
36  
37  
38  
39  
40  
41  
42  
43  
44  
45  
46  
47  
48  
49  
50  
51  
52  
53  
54  
55  
56  
57  
58  
59  
60

285. Perinatal statistics: parturients, deliveries and newborns 2011. Statistical Report 20/2012. [updated 2012 Dec 12; cited 2013 Apr 10]. Official Statistics of Finland, Health 2012. THL. Available from: [http://www.thl.fi/en-US/web/en/statistics/topics/reproductive\\_health/deliveries](http://www.thl.fi/en-US/web/en/statistics/topics/reproductive_health/deliveries).

296. FINLEX. 2006. Government Degree on Screenings act 1339/2006. [cited 2013 Aug 10]. Available from: <http://www.finlex.fi/en/>.

3027. Bradford JA, Giles WB. Teenage pregnancy in western Sydney. *Aust N Z J Obstet Gynaecol*. 1989;29:1-4.

3128. Abu-Heija A, Ali AM, Al-Dakheil S. Obstetrics and perinatal outcome of adolescent nulliparous pregnant women. *Gynecol Obstet Invest*. 2002;53:90-2.

3229. Briggs MM, Hopman WM, Jamieson MA. Comparing pregnancy in adolescents and adults: obstetric outcomes and prevalence of anemia. *J Obstet Gynaecol Can*. 2007;29:546-55.

330. Brown HL, Fan YD, Gonsoulin WJ. Obstetric complications in young teenagers. *South Med J*. 1991;84:46-8.

341. Mahavarkar SH, Madhu CK, Mule VD. A comparative study of teenage pregnancy. *J Obstet Gynaecol*. 2008;28:604-7.

352. Sagili H, Pramya N, Prabhu K, Mascarenhas M, Reddi Rani P. Are teenage pregnancies at high risk? A comparison study in a developing country. *Arch Gynecol Obstet*. 2012;285:573-7.

363. Imamura M, Tucker J, Hannaford P, da Silva MO, Astin M, Wyness L, et al. Factors associated with teenage pregnancy in the European Union countries: a systematic review. *Eur J Public Health*. 2007;17:630-6.

374. Vikat A, Rimpela A, Kosunen E, Rimpela M. Sociodemographic differences in the occurrence of teenage pregnancies in Finland in 1987-1998: a follow up study. *J Epidemiol Community Health*. 2002;56:659-68.

385. Cavazos-Rehg PA, Krauss MJ, Spitznagel EL, Schootman M, Cottler LB, Bierut LJ. Brief report: Pregnant by age 15 years and substance use initiation among US adolescent girls. *J Adolesc*. 2012;35:1393-7.

396. Hansen BT, Kjaer SK, Munk C, Tryggvadottir L, Sparen P, Hagerup-Jenssen M, et al. Early smoking initiation, sexual behavior and reproductive health - a large population-based study of Nordic women. *Prev Med*. 2010;51:68-72.

4037. Beard JL. Iron requirements in adolescent females. *J Nutr*. 2000;130(2S Suppl):440S-2S.

4138. Scanlon KS, Yip R, Schieve LA, Cogswell ME. High and low hemoglobin levels during pregnancy: differential risks for preterm birth and small for gestational age. *Obstet Gynecol*. 2000;96:741-8.

Formatted: Font: 12 pt, No underline, Font color: Auto, Finnish

Formatted: Font: 12 pt, No underline, Font color: Auto, Finnish

- 1  
2  
3  
4  
5  
6  
7 592 | [4239](#). Morikawa M, Cho K, Yamada T, Yamada T, Sato S, Minakami H. Risk factors for eclampsia in  
8 593 | Japan between 2005 and 2009. *Int J Gynaecol Obstet*. 2012;117:66-8.  
9  
10594 | [430](#). Tebeu PM, Halle G, Lemogoum D, Simo Wambo AG, Kengne Fosso G, Fomulu JN. Risk factors  
11595 | for eclampsia among patients with pregnancy-related hypertension at Maroua Regional Hospital,  
12596 | Cameroon. *Int J Gynaecol Obstet*. 2012;118:254-6.  
13  
14597 | [441](#). Menacker F, Martin JA, MacDorman MF, Ventura SJ. Births to 10-14 year-old mothers, 1990-  
15598 | 2002: trends and health outcomes. *Natl Vital Stat Rep*. 2004;53:1-18.  
16  
17599 | [452](#). Ansari MZ, Mueller BA, Krohn MA. Epidemiology of eclampsia. *Eur J Epidemiol*. 1995;11:447-  
18600 | 51.  
19  
20601 | [463](#). Macdonald-Wallis C, Lawlor DA, Heron J, Fraser A, Nelson SM, Tilling K. Relationships of risk  
21602 | factors for pre-eclampsia with patterns of occurrence of isolated gestational proteinuria during  
22603 | normal term pregnancy. *PLoS ONE*. 2011;6:e22115.  
23  
24604 | [474](#). Knight M, Ukoss. Eclampsia in the United Kingdom 2005. *BJOG*. 2007;114:1072-8.  
25  
26605 | [485](#). Morikawa M, Yamada T, Minakami H. Outcome of pregnancy in patients with isolated  
27606 | proteinuria. *Curr Opin Obstet Gynecol*. 2009;21:491-5.  
28  
29607 | [496](#). Franceschini N, Savitz DA, Kaufman JS, Thorp JM. Maternal urine albumin excretion and  
30608 | pregnancy outcome. *Am J Kidney Dis*. 2005;45:1010-8.  
31  
32609 | [5047](#). Masuyama H, Suwaki N, Nakatsukasa H, Masumoto A, Tateishi Y, Hiramatsu Y. Circulating  
33610 | angiogenic factors in preeclampsia, gestational proteinuria, and preeclampsia superimposed on  
34611 | chronic glomerulonephritis. *Am J Obstet Gynecol*. 2006;194:551-6.  
35  
36612 | [5148](#). Mittal P, Wing DA. Urinary tract infections in pregnancy. *Clin Perinatol* 2005;32:749-64.  
37  
38613 | [5249](#). Farkash E, Weintraub AY, Sergienko R, Wiznitzer A, Zlotnik A, Sheiner E. Acute antepartum  
39614 | pyelonephritis in pregnancy: a critical analysis of risk factors and outcomes. *Eur J Obstet Gynecol*  
40615 | *Reprod Biol*. 2012;162:24-7.  
41  
42616 | [530](#). Romero R, Oyarzun E, Mazor M, Sirtori M, Hobbins JC, Bracken M. Meta-analysis of the  
43617 | relationship between asymptomatic bacteriuria and preterm delivery/low birth weight. *Obstet*  
44618 | *Gynecol*. 1989;73:576-82.  
45  
46619 | [544](#). Partridge S, Balayla J, Holcroft CA, Abenheim HA. Inadequate prenatal care utilization and  
47620 | risks of infant mortality and poor birth outcome: a retrospective analysis of 28,729,765 U.S.  
48621 | deliveries over 8 years. *Am J Perinatol*. 2012;29:787-93.  
49622  
50623  
51624  
52625  
53626  
54627  
55  
56  
57  
58  
59  
60

1  
2  
3  
4  
5  
6  
7  
8  
9  
10  
11  
12  
13  
14  
15  
16  
17  
18  
19  
20  
21  
22  
23  
24  
25  
26  
27  
28  
29  
30  
31  
32  
33  
34  
35  
36  
37  
38  
39  
40  
41  
42  
43  
44  
45  
46  
47  
48  
49  
50  
51  
52  
53  
54  
55  
56  
57  
58  
59  
60

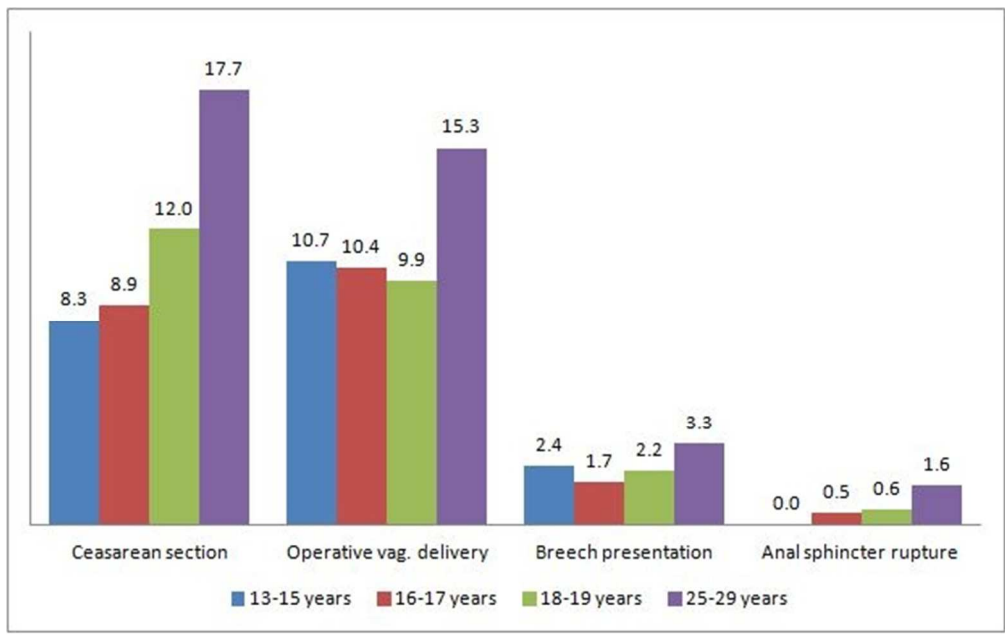

Fig. 1  
52x32mm (300 x 300 DPI)

review only

STROBE 2007 (v4) Statement—Checklist of items that should be included in reports of *cohort studies*

| Section/Topic                | Item # | Recommendation                                                                                                                                                                       | Reported on page # |
|------------------------------|--------|--------------------------------------------------------------------------------------------------------------------------------------------------------------------------------------|--------------------|
| Title and abstract           | 1      | (a) Indicate the study's design with a commonly used term in the title or the abstract                                                                                               | 1 and 2            |
|                              |        | (b) Provide in the abstract an informative and balanced summary of what was done and what was found                                                                                  | 2 and 3            |
| <b>Introduction</b>          |        |                                                                                                                                                                                      |                    |
| Background/rationale         | 2      | Explain the scientific background and rationale for the investigation being reported                                                                                                 | 5                  |
| Objectives                   | 3      | State specific objectives, including any prespecified hypotheses                                                                                                                     | 5 and 6            |
| <b>Methods</b>               |        |                                                                                                                                                                                      |                    |
| Study design                 | 4      | Present key elements of study design early in the paper                                                                                                                              | 2, 6 and 7         |
| Setting                      | 5      | Describe the setting, locations, and relevant dates, including periods of recruitment, exposure, follow-up, and data collection                                                      | 6                  |
| Participants                 | 6      | (a) Give the eligibility criteria, and the sources and methods of selection of participants. Describe methods of follow-up                                                           | 6                  |
|                              |        | (b) For matched studies, give matching criteria and number of exposed and unexposed                                                                                                  | -                  |
| Variables                    | 7      | Clearly define all outcomes, exposures, predictors, potential confounders, and effect modifiers. Give diagnostic criteria, if applicable                                             | 7 and 8            |
| Data sources/<br>measurement | 8*     | For each variable of interest, give sources of data and details of methods of assessment (measurement). Describe comparability of assessment methods if there is more than one group | 7 and 8            |
| Bias                         | 9      | Describe any efforts to address potential sources of bias                                                                                                                            | 6, 10 and 11       |
| Study size                   | 10     | Explain how the study size was arrived at                                                                                                                                            | 6                  |
| Quantitative variables       | 11     | Explain how quantitative variables were handled in the analyses. If applicable, describe which groupings were chosen and why                                                         | 7 and 8            |
| Statistical methods          | 12     | (a) Describe all statistical methods, including those used to control for confounding                                                                                                | 10 and 11          |
|                              |        | (b) Describe any methods used to examine subgroups and interactions                                                                                                                  | 10                 |
|                              |        | (c) Explain how missing data were addressed                                                                                                                                          | 11                 |
|                              |        | (d) If applicable, explain how loss to follow-up was addressed                                                                                                                       | -                  |
|                              |        | (e) Describe any sensitivity analyses                                                                                                                                                | -                  |
| <b>Results</b>               |        |                                                                                                                                                                                      |                    |

|                          |     |                                                                                                                                                                                                              |                    |
|--------------------------|-----|--------------------------------------------------------------------------------------------------------------------------------------------------------------------------------------------------------------|--------------------|
| Participants             | 13* | (a) Report numbers of individuals at each stage of study—eg numbers potentially eligible, examined for eligibility, confirmed eligible, included in the study, completing follow-up, and analysed            | 6                  |
|                          |     | (b) Give reasons for non-participation at each stage                                                                                                                                                         | 6                  |
|                          |     | (c) Consider use of a flow diagram                                                                                                                                                                           | -                  |
| Descriptive data         | 14* | (a) Give characteristics of study participants (eg demographic, clinical, social) and information on exposures and potential confounders                                                                     | 9, 11, 12          |
|                          |     | (b) Indicate number of participants with missing data for each variable of interest                                                                                                                          | 9 and 19           |
|                          |     | (c) Summarise follow-up time (eg, average and total amount)                                                                                                                                                  | -                  |
| Outcome data             | 15* | Report numbers of outcome events or summary measures over time                                                                                                                                               | 12-17              |
| Main results             | 16  | (a) Give unadjusted estimates and, if applicable, confounder-adjusted estimates and their precision (eg, 95% confidence interval). Make clear which confounders were adjusted for and why they were included | 12-17              |
|                          |     | (b) Report category boundaries when continuous variables were categorized                                                                                                                                    | 12, 14, 15, 17, 19 |
|                          |     | (c) If relevant, consider translating estimates of relative risk into absolute risk for a meaningful time period                                                                                             | -                  |
| Other analyses           | 17  | Report other analyses done—eg analyses of subgroups and interactions, and sensitivity analyses                                                                                                               | 18, 19             |
| <b>Discussion</b>        |     |                                                                                                                                                                                                              |                    |
| Key results              | 18  | Summarise key results with reference to study objectives                                                                                                                                                     | 20                 |
| <b>Limitations</b>       |     |                                                                                                                                                                                                              |                    |
| Interpretation           | 20  | Give a cautious overall interpretation of results considering objectives, limitations, multiplicity of analyses, results from similar studies, and other relevant evidence                                   | 22-25              |
| Generalisability         | 21  | Discuss the generalisability (external validity) of the study results                                                                                                                                        | 25 and 26          |
| <b>Other information</b> |     |                                                                                                                                                                                                              |                    |
| Funding                  | 22  | Give the source of funding and the role of the funders for the present study and, if applicable, for the original study on which the present article is based                                                | 27                 |

\*Give information separately for cases and controls in case-control studies and, if applicable, for exposed and unexposed groups in cohort and cross-sectional studies.

**Note:** An Explanation and Elaboration article discusses each checklist item and gives methodological background and published examples of transparent reporting. The STROBE checklist is best used in conjunction with this article (freely available on the Web sites of PLoS Medicine at <http://www.plosmedicine.org/>, Annals of Internal Medicine at <http://www.annals.org/>, and Epidemiology at <http://www.epidem.com/>). Information on the STROBE Initiative is available at [www.strobe-statement.org](http://www.strobe-statement.org).
